# Supplementary material for: Trichromophoric pentapeptide: impact of β-sheet conformation on dual path to excimer emission and sensing of BSA
Source: Royal Society of Chemistry journal article supplement (doi:10.1039/c6ra14084j), 2016-01-01
Supplement: c6ra14084j1.pdf [file c6ra14084j1.pdf]

## Trichromophoric Pentapeptide: Impact of $\beta$ -Sheet Conformation on Dual Path to Excimer Emission and Sensing of BSA<sup>†</sup>

Subhendu Sekhar Bag,\* Subhashis Jana, Manoj Kumar Pradhan and Sunit Pal

*Bioorganic Chemistry Laboratory, Department of Chemistry, Indian Institute of Technology Guwahati, North Guwahati-781039, Assam, India. Fax: +91-361-258-2349; Tel: +91-361-258-2324. E-mail: [ssbag75@iitg.ernet.in](mailto:ssbag75@iitg.ernet.in)*

| Topics                                                                                                            | Page     |
|-------------------------------------------------------------------------------------------------------------------|----------|
| 1. General Experimental Section (Materials and Methods)                                                           | S2       |
| 2. Synthetic Schemes                                                                                              | S3-S6    |
| 3. Synthetic Procedure and Characterization Data of Synthesized Peptides                                          | S7-S19   |
| 4. Spectroscopic Evidences of Various Interactions and $\beta$ -sheet like Structures in the Synthesized Peptides | S19-S25  |
| 5. Conformational Analysis of peptides 2, 3 by 2D NMR Spectroscopy                                                | S26-S34  |
| 6. Macro Model Study and Molecular Dynamics Simulation                                                            | S34-S36  |
| 7. Photophysical Properties/Spectra and summary table of peptide 2                                                | S37-S41  |
| 8. Study of Fluorescence Resonance Energy Transfer (FRET) in Pentapeptide 2 & Photograph under fluorescence light | S41-S44  |
| 9. Time Resolved Fluorescence Lifetime Study and Spectra of Peptide 2                                             | S44-S48  |
| 10. Studies on the interaction of Pentapeptide 2 with BSA                                                         | S49-S59  |
| 11. Molecular docking calculation                                                                                 | S60- S61 |
| 12. Determination of the Detection Limit of BSA protein                                                           | S61- S62 |
| 13. Studies on the interaction of Pentapeptide 2 with $\alpha$ -Amylase                                           | S62      |
| 14. Plot of relative change of florescence intensity of pentapeptide 2 with BSA and $\alpha$ -Amylase             | S63      |
| 15. $^1\text{H}$ and $^{13}\text{C}$ NMR spectra of synthesized compounds                                         | S64-S91  |

## 1. General Experimental Section (Materials and Methods)

All reactions except Boc-protection of primary amine were carried out under nitrogen atmosphere in flame-dried glassware, using a nitrogen filled balloon. Organic extracts were dried over anhydrous sodium sulfate. Solvents were removed in a rotary evaporator under reduced pressure. Silica gel (60- 120 mesh size) was used for the column chromatography. Reactions were monitored by TLC on silica gel 60 F254 (0.25).  $^1\text{H}$  NMR spectra were recorded either at 400 MHz or at 600 MHz and  $^{13}\text{C}$  NMR spectra were recorded either at 100 MHz or at 150 MHz (mentioned accordingly). Coupling constants (J value) were reported in hertz (Hz). The chemical shift were shown in ppm downfield from tetramethylsilane, using residual chloroform ( $\delta = 7.26$  in  $^1\text{H}$  NMR,  $\delta = 77.23$  in  $^{13}\text{C}$  NMR), DMSO ( $\delta = 2.5$  in  $^1\text{H}$  NMR,  $\delta = 39.5$  in  $^{13}\text{C}$  NMR), as an internal standard. Mass spectra were recorded with a HR mass spectrometer and data analysed by using built-in software. IR spectra were recorded in KBr on a FT-IR spectrometer.

All 2D NMR Experiments were carried out on 600 MHz (Bruker Ascend<sup>TM</sup> Aeon) spectrometer at room temperature using 7 - 10 mM concentration in  $\text{d}_6$ -DMSO solvent. Spectra were acquired with 2048 x 256 in both dimension (F2 and F1) and other parameter are given below. Parametre of

**TOCSY** : Free induction decay (FID) with NS = 16 and DS =32, relaxation delay (D1) 2s, mixing time (D9) 0.08s, acquisition time (AQ) 0.085s, spectral width 12019 Hz.

**ROESY** : Free induction decay (FID) with NS = 16 and DS =16, relaxation delay (D1) 2s, mixing time (P15) 0.02s, acquisition time (AQ) 0.085s, spectral width (SWH) 12019 Hz.

**NOESY** : Free induction decay (FID) with NS = 8 and DS =16, relaxation delay (D1) 2s, mixing time (D8) 0.6s, acquisition time (AQ) 0.085s, spectral width (SWH) 12019 Hz.

## 2. Synthetic Schemes

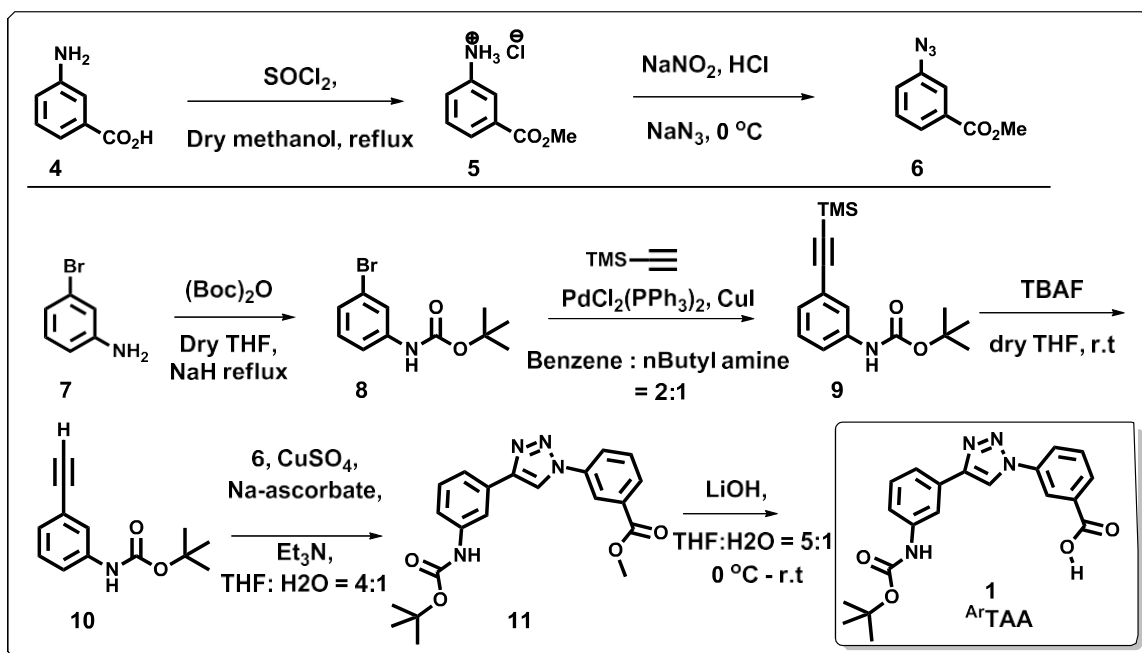

**Scheme 1:** Synthetic scheme for the triazolyl aromatic amino acid scaffold (**1**,  $\text{ArTAA}$ ).

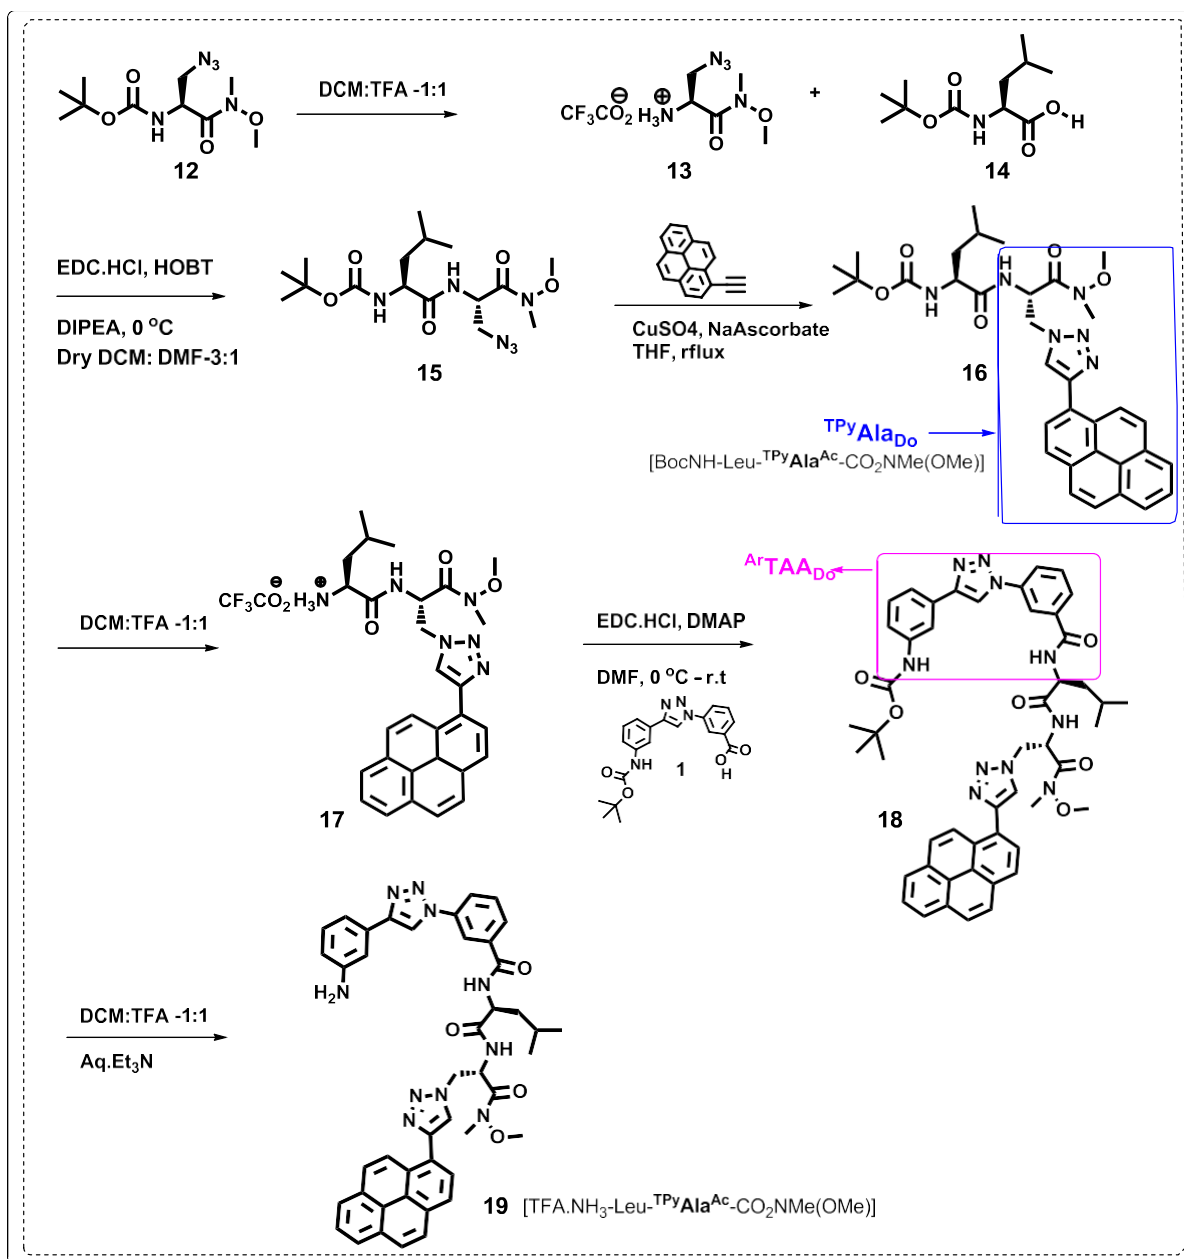

**Scheme 2:** Synthetic scheme of triazolyl aromatic amino acid scaffold based unnatural tripeptide **18**. [BocNH-<sup>Ar</sup>TAA<sub>D0</sub>-Leu-<sup>TPy</sup>Ala<sub>D0</sub>-CO<sub>2</sub>NMe(OMe)].



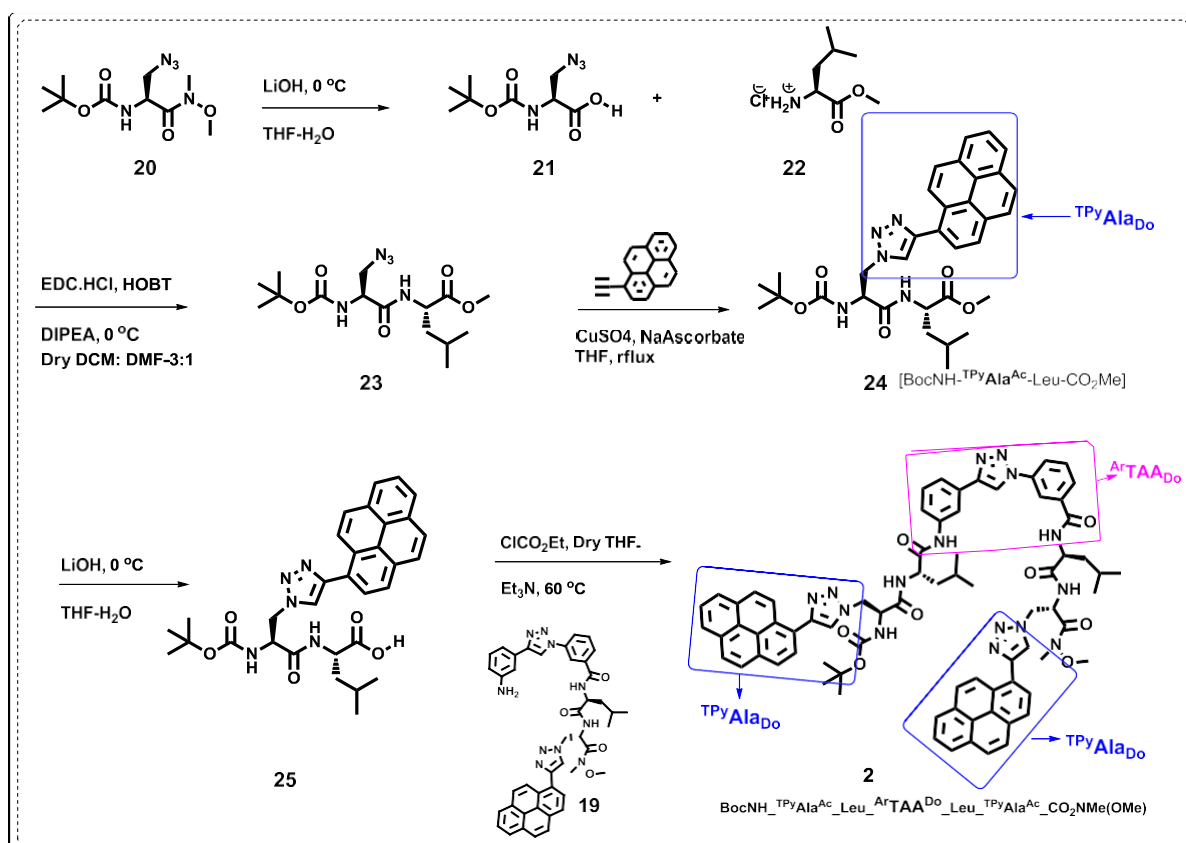

**Scheme 3:** Synthetic scheme of aromatic triazolyl amino acid scaffold based unnatural pentapeptide **2** [BocNH-TPyAla<sup>Ac</sup>-Leu-Ar<sup>TAA</sup>D<sub>0</sub>-Leu-TPyAla<sup>Ac</sup>-CO<sub>2</sub>NMe(OMe)].

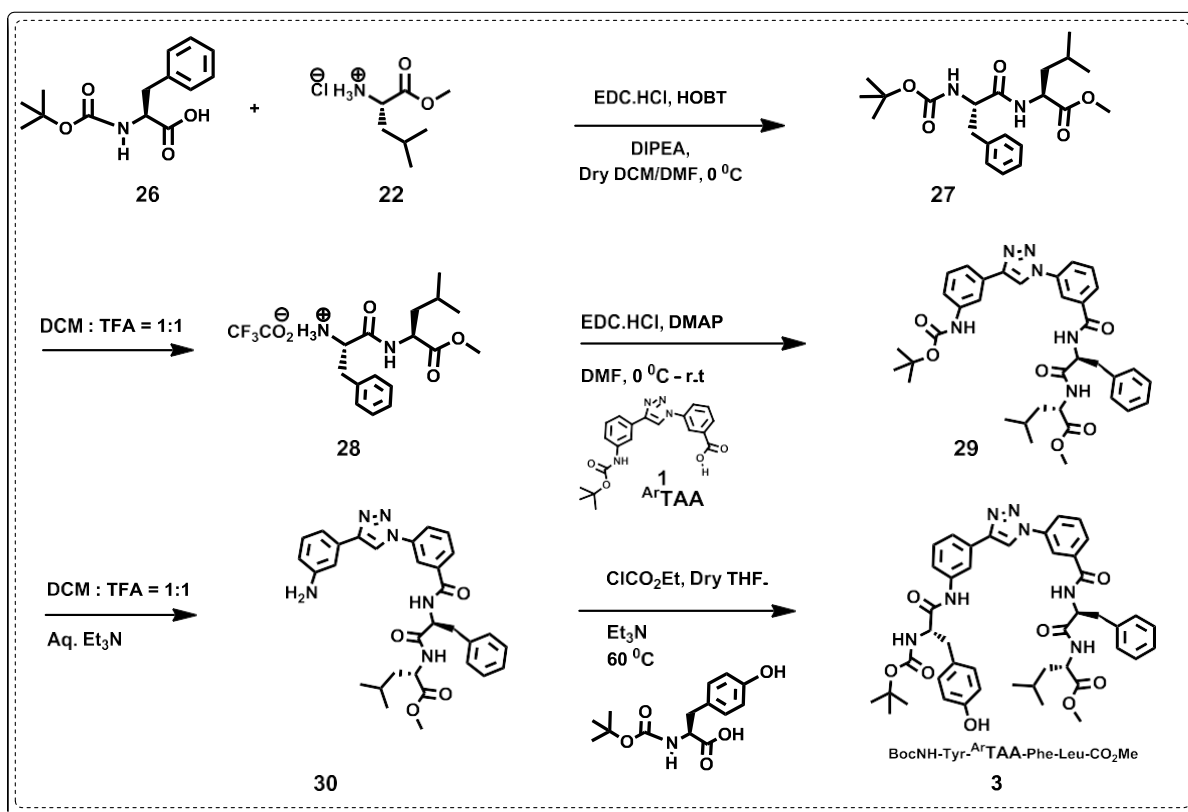

**Scheme 4:** Synthetic scheme of triazolyl aromatic amino acid scaffold based Leu-enkephaline analogue natural **tetrapeptide 3** (BocNH-Tyr-Ar-TAA-Phe-Leu-CO<sub>2</sub>Me).

### 3. Synthetic Procedure and Characterization Data of Synthesized Peptides

#### 3.1. Some General Procedure for Our Synthetic Scheme of Peptides

**3.1.1. General procedure for the Peptide coupling :** To a solution N-protected amino acids in 3:1 mixture of dry DCM and DMF, 1-[3-dimethyl amino propyl]-3-ethylcarbodiimide hydrochloride (EDC.HCl) (1.2 equiv) and HOBt (1.2 equiv) were added and the reaction mixture was stirred for 1h at 0 °C. Then the amine salt of wienreb amide or methyl ester protected corresponding amino acids or dipeptide (1.1 equiv) were added followed by diisopropylethylamine (DIPEA) (2.4 equiv). The reaction mixture was stirred for another 18-20 h at 0 °C to room temperature. Then solvent was dried by rotary evaporator, after which it was partitioned between EtOAc and aqueous NaHCO<sub>3</sub> solution (50 ml each). The organic layer was washed with brine solution. Pure product was isolated in pure form by column chromatography (Si-gel, PE : EtOAc = 1:1).

**3.1.2. General procedure of [3+2] Cyclo-addition reaction :** The azido derivative of dipeptide was taken in 5:1 dry THF and water and degassed for 5 min with nitrogen gas. After adding alkyne (1.1 equiv) degassing were continued for the next 5 min. Then, 6 mol % sodium ascorbate and 1 mol% powdered CuSO<sub>4</sub> were added. Then 1.2eqv Et<sub>3</sub>N was added and reaction mixture was degassed and allowed to proceed for 18-20 h about 65 to 70 °C. After total consumption of the starting azide, the reaction mixture was evaporated completely and work up was done by EtOAc and NH<sub>4</sub>Cl solution. The organic layer was washed with brine, dried over Na<sub>2</sub>SO<sub>4</sub>. The title triazolyl unnatural dipeptides were separated by column chromatography and characterized.

**3.1.3. General procedure for the deprotection of the methyl ester :** To a solution of the respective methyl ester protected peptide in THF : H<sub>2</sub>O = 5 : 1, lithium hydroxide (1.5 equivalent) was added at 0 °C. The reaction mixture was stirred about 3-4 hour until starting material was consumed. Reaction was monitored by TLC. After completion of the reaction, solvent dried by rotary evaporator. Then water (4-5 ml) was added to the reaction mixture and cooled to 0 °C. The dilute acetic acid was added to the reaction mixture to adjust pH- 3 to 4. The reaction mixture was extracted with EtOAc. The combined organic layers were dried over Na<sub>2</sub>SO<sub>4</sub>. The hydrolysed compound was isolated by column chromatography (Si-gel, CHCl<sub>3</sub>:MeOH = 10:1). Yield was 90-96%.

**3.1.4. General procedure for the deprotection of the Boc-group :** The respective both side protected amino acids or peptides was dissolved in  $\text{CH}_2\text{Cl}_2$  and cooled to  $0\text{ }^\circ\text{C}$ . TFA (equal amount as the solvent) was added and the solution was allowed to warm to room temperature. The stirring was continue at room temperature until the starting material was consumed (TLC monitoring). The reaction mixture was evaporated *in vacuo*. The residual TFA was evaporated by triturating the mixture with dry toluene thrice, evaporated thrice and dried to afford the product in quantitative yield.

But in some cases to get free amine, water (4-5 ml) was added to the reaction mixture after evaporation of reaction solvent and cooled at  $0\text{ }^\circ\text{C}$  temperature. Then diluted aq.  $\text{Et}_3\text{N}$  was added to the reaction mixture to adjust pH- 8. The reaction mixture was extracted with EtOAc. The combined organic layers were dried over  $\text{Na}_2\text{SO}_4$  and evaporated *in vacuo* to yield the crude product in quantitative yield to use for next step.

### 3.2. Synthetic route of aromatic triazolyl amino acid scaffold (1,<sup>Ar</sup>TAA)

#### 3.2.1. Synthesis of 3-(methoxycarbonyl) benzenaminium chloride (5):

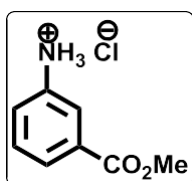

acid **4** (1500 mg) was taken in a dried RB then it is dissolved by adding dry methanol. Under ice cold condition 1.5 equivalent  $\text{SOCl}_2$  was added into the reaction mixture. After 15 minute reaction mixture was refluxed for 5-6 hours. After that reaction solvent was dried in rotary evaporator and washed the reaction mixture with toluene 3 times. The title compound **5** was isolated in quantitative yield.

#### 3.2.2. Synthesis of methyl 3-azidobenzoate (6) :

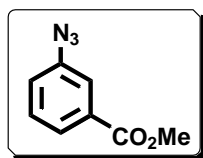

Starting material **6** (1500 mg) was taken in a conical then it dissolved by adding water and it was acidified with dil. HCl under ice cool condition. Then drop by drop 1.5 equivalent  $\text{NaNO}_2$  solution was added to the reaction mixture. Consequently 1.5 eqv.  $\text{NaN}_3$  solution was added slowly to the reaction mixture. After few minute to complete the reaction it was work up by ethyl acetate. The combined organic layer was washed by brine solution dried over  $\text{Na}_2\text{SO}_4$ . The title compound **6** was isolated by column chromatography (si-gel, PE) in pure form as colourless oil (1079 mg, Yield 76 %). IR (KBr) 2953, 2844, **2115**, 1727, 1585, 1484, 1443, 1300, 1140,  $752\text{ cm}^{-1}$ .

**3.2.3. Synthesis of *tert*-butyl (3-bromophenyl)carbamate (8) :** In a dry THF, NaH (1.1 eqv) (washed by hexane) and 3-bromo aniline **7** (1 ml, 8.7 mmol) were taken. The reaction

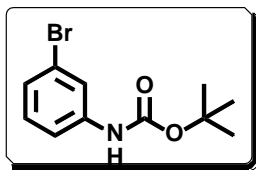

mixture was heated to reflux for one hour then cooled to room temperature. Boc anhydride (1.5 ml, 10.4 mmol) was added and reaction mixture was stirred for 30 minute. A second portion of sodium hydride (same eqv. amount again) was added to the reaction mixture and refluxed overnight. The reaction mixture was cooled to room temperature, carefully quenched by water. The reaction mixture was extracted with EtOAc. The combined organic layers were dried over Na<sub>2</sub>SO<sub>4</sub>. The Pure product **8** was isolated by column chromatography (Si-gel, PE : EtOAc = 10:1). (2070 mg, 7.6 mmol, Yield 88 %).

**3.2.4. Synthesis of *tert*-butyl (3-((trimethylsilyl)ethynyl)phenyl)carbamate (9) :** In a dry R.B, compound **8** ( 800 mg, 2.95 mmol) was taken with dry solvent benzene : n-butyl

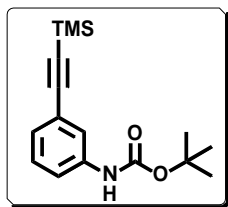

amine = 2:1 then catalyst PdCl<sub>2</sub>(PPh<sub>3</sub>)<sub>2</sub> (103.6 mg, 0.147 mmol) was added and degassed by N<sub>2</sub> gas. After fifteen minute of stirring the reaction mixture, TMS acetylene (600 µl, 4.42 mmol) and CuI (11.2 mg, 0.06 mmol) was added and heated to 80 °C temperature for 12 hour. Then solvent was dried by rotary evaporator, then it was partitioned between EtOAc and aqueous NH<sub>4</sub>Cl solution (20 ml each). The organic layer was washed with brine solution. Pure product **9** (665 mg, 2.3 mmol) was isolated in pure form by column chromatography (Si-gel, PE : EtOAc = 10:1). Yield 78 %. <sup>1</sup>H NMR (CDCl<sub>3</sub>; 400 MHz) δ 0.15 (9H, s); 1.42 (9H, s); 6.52 (1H, bs); 7.04 (1H, d, *J* = 6.8 Hz); 7.1 (1H, t, *J* = 8.2 Hz); 7.17 (1H, d, *J* = 8.4 Hz); 7.48 (1H, s); <sup>13</sup>C NMR (CDCl<sub>3</sub>; 100 MHz) δ 0.1, 28.4, 80.8, 94.3, 104.9, 118.8, 121.8, 126.7, 128.9, 130.3, 138.4, 152.7.

**3.2.5. Synthesis of *tert*-butyl (3-ethynylphenyl)carbamate (10) :** Compound **9**, 650 mg (2.24 mmol) was dissolved in 8 ml THF with 1 ml methanol, 314

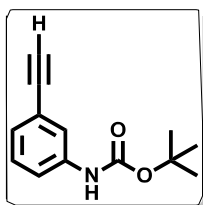

mg (5.6 mmol) KOH was added to the solution at room temperature and stirrer overnight. Then solvent was dried by rotary evaporator, then it was partitioned between EtOAc and water. The organic layer was washed with brine solution. Pure product **10** (468 mg, 2.15 mmol) was isolated in pure form by column chromatography (Si-gel, PE : EtOAc = 10:1). Yield 96 %. <sup>1</sup>H NMR (CDCl<sub>3</sub>; 400 MHz) δ 1.5 (9H, s); 3.04 (1H, s); 6.63 (1H, s); 7.14 (1H, d, *J* = 7.6 Hz); 7.19 (1H, t, *J* = 8 Hz); 7.43 (1H, d, *J* = 8 Hz); 7.53 (1H,

s);  $^{13}\text{C}$  NMR ( $\text{CDCl}_3$ ; 100 MHz)  $\delta$  28.4, 77.3, 80.9, 83.5, 119.2, 122.1, 122.8, 126.8, 129.1, 138.5, 152.7.

**3.2.6. Synthesis of methyl 3-(4-(3-((tert-butoxycarbonyl)amino)phenyl)-1H-1,2,3-triazol-1-yl)benzoate (11) :** The ethynyl derivative **10**, 450 mg (2.06 mmol) was taken in a

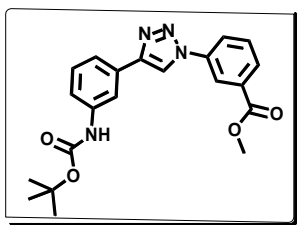

5:1 dry THF and water system and degassed for 5 min with nitrogen gas. Methyl 3-azidobenzoate **6**, 403 mg (2.3 mmol), 6 mol % sodium ascorbate and 1 mol% powdered  $\text{CuSO}_4$  were added followed by. Then 1.2 eqv  $\text{Et}_3\text{N}$  was added and reaction mixture was degassed and refluxed for 18-20 hour.

After finishing starting material, the reaction mixture was evaporated completely and it was partitioned by EtOAc and  $\text{NH}_4\text{Cl}$  solution. The organic layer was washed with brine, dried over  $\text{Na}_2\text{SO}_4$ . Pure product **11** (670 mg, 1.7 mmol) was isolated in pure form by column chromatography (Si-gel, PE : EtOAc = 2:1). Yield 82 %. IR (KBr) 3328, 3137, 2965, 2919, 1718, 1593, 1448, 1289, 1151, 762  $\text{cm}^{-1}$ .  $^1\text{H}$  NMR ( $\text{d}_6$ -DMSO; 600 MHz)  $\delta$  1.48 (9H, s); 3.91 (3H, s); 7.38-7.34 (2H, m); 7.52 (1H, d,  $J$  = 6.6 Hz); 7.78 (1H, t,  $J$  = 7.8 Hz); 8.06 (1H, d,  $J$  = 7.8 Hz); 8.17 (1H, s), 8.24 (1H, d,  $J$  = 7.8 Hz); 8.49 (1H, s); 9.33 (1H, s); 9.45 (1H, s);  $^{13}\text{C}$  NMR ( $\text{d}_6$ -DMSO; 150 MHz)  $\delta$  28.5, 52.9, 79.7, 115.4, 118.7, 119.9, 120.1, 120.6, 124.8, 129.5, 129.8, 130.7, 131.1, 131.7, 137.1, 140.4, 147.9, 153.3, 165.8. HRMS calcd for  $\text{C}_{21}\text{H}_{23}\text{N}_4\text{O}_4$  ( $[\text{M} + \text{H}]^+$ ) 395.1712, found 395.1757.

**3.2.7. Synthesis of 3-(4-(3-((tert-butoxycarbonyl)amino)phenyl)-1H-1,2,3-triazol-1-yl)benzoic acid (1):** Using the general procedure of methyl

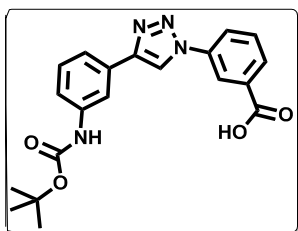

ester hydrolysis, starting from 500 mg (1.26 mmol) of **22**, 463 mg (1.2 mmol) of the title compound **1** (445 mg, 1.17 mmol) was isolated as a white solid material in pure form by column chromatography (Si-gel, PE : EtOAc = 1:2). Yield 93%.  $^1\text{H}$  NMR ( $\text{d}_6$ -DMSO; 400 MHz)  $\delta$  1.47 (9H, s); 7.36 (2H, s); 7.51 (1H, s); 7.75 (1H, t,  $J$  = 7.6 Hz); 8.04 (1H, d,  $J$  = 6.8 Hz), 8.16 (1H, s); 8.08 (1H, d,  $J$  = 8.0 Hz); 8.46 (1H, s); 9.33 (1H, s); 9.47 (1H, s);  $^{13}\text{C}$  NMR ( $\text{d}_6$ -DMSO; 100 MHz)  $\delta$  28.4, 79.6, 115.3, 118.5, 119.9, 120.1, 120.6, 120.7, 124.4, 129.5, 130.8, 132.9, 137.1, 140.4, 147.9, 153.2, 166.7. HRMS calcd for  $\text{C}_{20}\text{H}_{19}\text{N}_4\text{O}_4$   $[\text{M} - \text{H}]^-$  379.3892, found 379.3237.

**33 Synthesis of natural di, tri, tatrapeptides and triazolyl donor/acceptor unnatural pentapeptides (2 & 3):** The targeted peptides were synthesized following the general procedure of peptide coupling protocol as was earlier discussed. The pure product was isolated by column chromatography.

**3.3.1. Synthesis of (S)-tert-butyl (3-azido-1-(methoxy(methyl)amino)-1-oxopropan-2-yl)carbamate (12):**

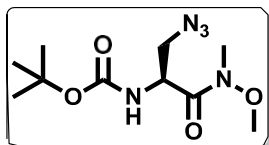

Using our previous method from 1500 mg (7.31 mmol) of N-Boc-protected L-serine, 730 mg (2.68 mmol) of the title compound **12** was prepared. Overall Yield 74 %.

**3.3.2. Synthesis of Boc deprotected (S)-tert-butyl (3-azido-1-(methoxy(methyl)amino)-1-oxopropan-2-yl)carbamate (13):**

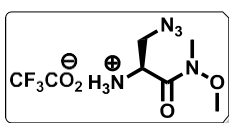

Using the general procedure of Boc-deprotection, we have deprotected the Boc-protection of compound **12** (730 mg, 2.68 mmol). The product **13** was obtained in quantitative yield and were used without further purification and characterization.

**3.3.3. Synthesis of tert-butyl ((S)-1-(((S)-3-azido-1-(methoxy(methyl)amino)-1-oxopropan-2-yl)amino)-4-methyl-1-oxopentan-2-yl)carbamate (15) :**

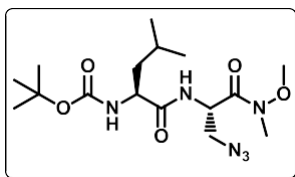

of peptide coupling, starting from 600 mg (2.59 mmol) of N-Boc-protected leucine **14** and 450 mg (2.59 mmol) of N-deprotected serine azide **13**, 620 mg (1.61 mmol) of the title compound **15** was isolated. Pure product was isolated in

pure form by column chromatography (Si-gel, PE : EtOAc = 2:1) as colourless oil.

Yield 58%. IR (KBr) 3335, 3244, 2966, 2105, 1685, 1643, 1523, 1272, 1170, 928  $\text{cm}^{-1}$ .  $^1\text{H}$  NMR ( $\text{CDCl}_3$ ; 400 MHz)  $\delta$  0.89 (6H, d,  $J = 3.2$  Hz); 1.4 (9H, s); 1.47-1.43 (1H, m); 1.63 (2H, m); 3.19 (3H, s); 3.55-3.51 (1H, m); 3.63-3.60 (1H, m); 3.72 (3H, s); 4.15 (1H, bs); 5.03 (1H, bs);  $^{13}\text{C}$  NMR ( $\text{CDCl}_3$ ; 100 MHz)  $\delta$  21.8, 23.1, 24.8, 28.3, 32.3, 41.4, 49.6, 51.9, 53.6, 61.8, 80.1, 155.6, 169.1, 172.8. HRMS calcd for  $\text{C}_{16}\text{H}_{31}\text{N}_6\text{O}_5$  ( $[\text{M} + \text{H}]^+$ ) 387.2277, found 387.2165.

**3.3.4. Synthesis of tert-butyl ((S)-1-(((S)-1-(methoxy(methyl)amino)-1-oxo-3-(4-(pyren-1-yl)-1H-1,2,3-triazol-1-yl)propan-2-yl)amino)-4-methyl-1-oxopentan-2-yl)carbamate (16) :** Using the general procedure of [3+2] cyclo-addition reaction, starting from 200 mg (0.52 mmol) of azide derivative of dipeptide **15** and 140 mg (0.62 mmol) of 1-

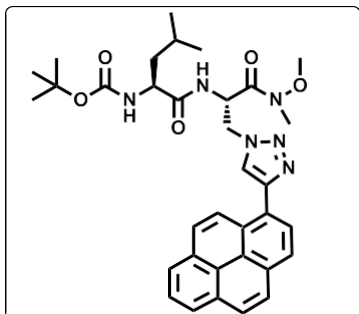

ethynyl pyrene, 247 mg (0.40 mmol) of the title compound **16** was isolated as a light brown solid material (Si-gel, PE : EtOAc = 1:1). Yield 78%; IR (KBr) 3450, 2958, 2928, 2102, 1653, 1509, 1390, 1167, 1049, 848  $\text{cm}^{-1}$ .  $^1\text{H}$  NMR ( $\text{CDCl}_3$ ; 600 MHz);  $\delta$  0.89 (6H, d,  $J = 5.4$  Hz); 1.38 (9H, s); 1.52-1.48 (1H, m); 1.67-1.59 (2H, m); 3.29 (3H, s); 3.7 (3H, s); 4.11

(1H, bs); 4.89 (1H, dd,  $J = 4.2$  Hz, 9.6 Hz); 4.95 (1H, d,  $J = 6.6$  Hz); 5.05 (1H, bs); 5.36 (1H, bs); 7.22 (1H, d,  $J = 5.4$  Hz); 7.99 (1H, t,  $J = 7.2$  Hz); 8.06 (2H, d,  $J = 4.8$  Hz); 8.09 (1H, t,  $J = 9.0$  Hz); 8.18-8.15 (3H, m); 8.30 (1H, s); 8.31 (1H, s); 8.79 (1H, d,  $J = 9.0$  Hz);  $^{13}\text{C}$  NMR ( $\text{CDCl}_3$ ; 150 MHz);  $\delta$  21.9, 23.1, 24.9, 28.4, 32.9, 41.1, 50.4, 50.7, 53.9, 62.1, 80.4, 124.8, 124.9, 125.0, 125.2, 125.3, 125.4, 126.1, 127.4, 127.5, 127.8, 128.2, 128.7, 131.1, 131.4, 131.5, 147.8, 155.9, 168.2, 173.2. HRMS calcd for  $\text{C}_{34}\text{H}_{41}\text{N}_6\text{O}_5$  ( $[\text{M} + \text{H}]^+$ ) 613.3133, found 613.3132.

**3.3.5. Synthesis of Boc deprotected (S)-1-(((S)-1-(methoxy(methyl)amino)-1-oxo-3-(4-(pyren-1-yl)-1H-1,2,3-triazol-1-yl)propan-2-yl)amino)-4-methyl-1-oxopentan-2-**

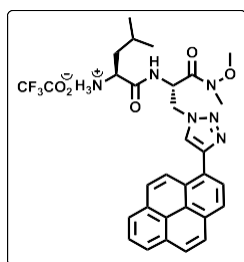

**aminium 2,2,2-trifluoroacetate (17):** Using the general procedure of Boc-deprotection, compound **16** ( 240 mg, 0.40 mmol) was deprotected. The product **17** was obtained in quantitative yield and were used without further purification and characterization.



**3.3.6. Synthesis of tert-butyl (3-(1-(3-(((S)-1-(((S)-1-(methoxy(methyl)amino)-1-oxo-3-(4-(pyren-1-yl)-1H-1,2,3-triazol-1-yl)propan-2-yl)amino)-4-methyl-1-oxopentan-2-yl)carbamoyl)phenyl)-1H-1,2,3-triazol-4-yl)phenyl)carbamate (**18**):** To a solution of

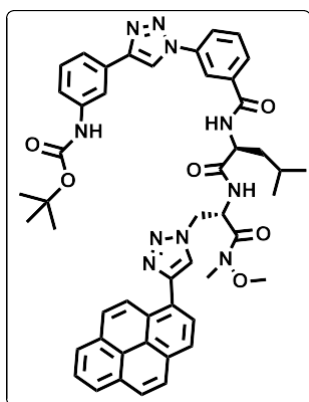

N-protected <sup>Ar</sup>TAA, **1** (130 mg, 0.342 mmol) in dry DMF was cooled to 0 °C by ice bath. Consequently 1-[3-dimethyl amino propyl]-3-ethylcarbo-diimide hydrochloride (EDC.HCl) (98 mg, 0.513 mmol), DMAP (125 mg, 1.02 mmol) and amine salt of weinrebamide protected corresponding dipeptide **17** were added and the reaction mixture was stirred for 18 hour at 0 °C to room temperature. Then solvent was dried by rotary evaporator,

after which it was partitioned between EtOAc and water (50 ml each). The organic layer was washed with brine solution. Pure product **18** (230 mg, 0.259 mmol) was isolated in pure form by column chromatography (Si-gel, EtOAc) as solid compound. Yield 76%. IR (KBr) 3452, 3325, 2931, 1726, 1654, 1530, 1385, 1524, 1236, 1160, 1051, 842 cm<sup>-1</sup>. <sup>1</sup>HNMR (CDCl<sub>3</sub>; 400 MHz) δ 0.87 (6H, d, *J* = 5.2 Hz); 1.53 (9H, s); 1.74-1.63 (3H, m); 3.30 (3H, s); 3.84 (3H, s); 4.78 (1H, q, *J* = 6.8 Hz); 4.87 (1H, dd, *J* = 8.0 Hz, 6.0 Hz); 5.01 (1H, bs); 5.48 (1H, bs); 6.91 (1H, t, *J* = 8.0 Hz); 7.05 (1H, bs); 7.24 (1H, s); 7.33-7.29 (2H, m); 7.41 (1H, d, *J* = 8 Hz); 7.51 (1H, d, *J* = 7.6 Hz); 7.66 (1H, d, *J* = 6.8 Hz); 7.74 (1H, s); 7.81 (1H, s); 7.90-7.87 (4H, m); 7.99-7.94 (4H, m); 8.08 (2H, t, *J* = 7.6 Hz); 8.20 (1H, s); 8.51 (1H, d, *J* = 8.4 Hz); <sup>13</sup>C NMR (CDCl<sub>3</sub>; 100 MHz) δ 21.7, 22.9, 24.8, 28.3, 32.5, 36.4, 40.4, 50.5, 52.8, 61.9, 80.4, 115.7, 117.9, 118.3, 118.5, 120.1, 122.4, 124.4, 124.6, 124.7, 124.8, 124.9, 125.2, 125.9, 127.1, 127.2, 127.6, 127.9, 128.2, 129.2, 129.4, 130.3, 130.6, 131.0, 131.1, 134.5, 136.2, 139.3, 147.2, 147.8, 153.2, 162.7, 168.3, 173.1. HRMS calcd for C<sub>49</sub>H<sub>51</sub>N<sub>10</sub>O<sub>6</sub> ([M + H]<sup>+</sup>) 875.3988, found 875.3993.

**3.3.7. Synthesis of (S)-3-azido-2-((tert-butoxycarbonyl)amino)propanoic acid (**21**):** Using

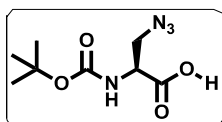

the general procedure of methyl ester hydrolysis, starting from 500 mg (1.83 mmol) of **20**, 387 mg (1.68 mmol) of the title compound **21** was isolated as a yellowish brown material and used for the next step without characterization. Yield 94%.

**3.3.8. Synthesis of (S)-methyl 2-((S)-3-azido-2-((tert-butoxycarbonyl)amino)propanamido)-4-methylpentanoate (23):** Using general procedure of peptide coupling, starting from

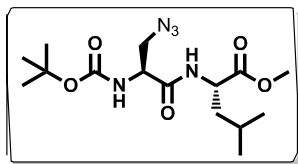

380 mg (1.6 mmol) of N-protected serine azide **21** and 297 mg (1.98 mmol) of N-deprotected amine salt of methyl ester -L-leucine **22**, 306 mg (0.85 mmol) of the title compound **23** was isolated. Pure product was isolated in

pure form by column chromatography (Si-gel, PE : EtOAc = 2:1) as light yellow oil.

Yield 52%. IR (KBr) 3326, 2960, 2873, 2105, 1745, 1666, 1524, 1368, 1250, 1023,

858, 780  $\text{cm}^{-1}$ .  $^1\text{H}$  NMR ( $\text{CDCl}_3$ ; 400 MHz)  $\delta$  0.88 (6H, d,  $J = 5.6$  Hz); 1.41 (9H, s);

1.63-1.51 (3H, m); 3.51 (1H, dd,  $J = 4.8$  Hz, 6.8 Hz); 3.68 (3H, s); 3.74-3.70 (1H, m);

4.30 (1H, bs); 4.56 (1H, bs); 5.51 (1H, d,  $J = 6.4$  Hz); 6.97 (1H, d,  $J = 6.4$  Hz);  $^{13}\text{C}$

NMR ( $\text{CDCl}_3$ ; 100 MHz)  $\delta$  21.9, 22.8, 24.8, 28.3, 41.3, 51.0, 52.2, 52.4, 53.7, 80.8,

155.5, 169.5, 173.1. HRMS calcd for  $\text{C}_{15}\text{H}_{27}\text{N}_5\text{O}_5\text{Na}$  ( $[\text{M} + \text{Na}]^+$ ) 380.1908, found

380.1909.

**3.3.9. Synthesis of (S)-methyl 2-((S)-2-((tert-butoxycarbonyl)amino)-3-(4-(pyren-1-yl)-1H-1,2,3-triazol-1-yl)propanamido)-4-methylpentanoate (24) :** Using general procedure

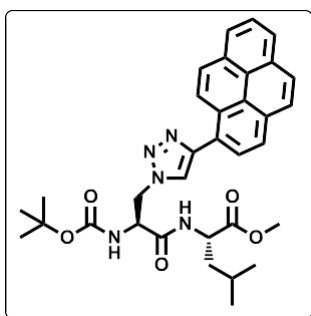

of [3+2] cyclo-addition reaction, starting from 250 mg (0.70 mmol) of azide derivative of dipeptide **23** and 190

mg (0.85 mmol) of 1-ethynyl pyrene, 245 mg (0.68 mmol)

of the title compound **24** was isolated as a light brown

solid material (Si-gel, PE : EtOAc = 1:1). Yield 60%; IR

(KBr) 3336, 2961, 1669, 1515, 1258, 1165, 847, 724  $\text{cm}^{-1}$ .

$^1\text{H}$  NMR ( $\text{CDCl}_3$ ; 600 MHz);  $\delta$  0.71 (6H, d,  $J = 6.0$  Hz);

1.47 (9H, s); 1.56-1.49 (3H, m); 3.67 (3H, s); 4.59-4.56 (1H, m); 4.90 (2H, bs); 5.06

(1H, bs); 6.05 (1H, d,  $J = 5.4$  Hz); 7.18 (1H, d,  $J = 4.8$  Hz); 8.03-7.97 (2H, m); 8.06

(2H, q,  $J = 4.8$  Hz); 8.10 (1H, s); 8.17-8.13 (3H, m); 8.20 (1H, d,  $J = 7.8$  Hz); 8.66

(1H, d,  $J = 9.6$  Hz);  $^{13}\text{C}$  NMR ( $\text{CDCl}_3$ ; 150 MHz);  $\delta$  21.7, 22.8, 24.9, 28.4, 41.3, 43.5,

51.1, 52.5, 54.6, 81.3, 124.8, 124.9, 125.0, 125.1, 125.2, 125.3, 125.5, 126.2, 127.2,

127.4, 128.0, 128.3, 128.6, 131.0, 131.3, 131.5, 131.6 147.5, 155.7, 169.0, 172.8.

HRMS calcd for  $\text{C}_{33}\text{H}_{38}\text{N}_5\text{O}_5$  ( $[\text{M} + \text{H}]^+$ ) 584.2867, found 584.2874.

**3.3.10. Synthesis of (S)-2-((S)-2-((tert-butoxycarbonyl)amino)-3-(4-(pyren-1-yl)-1H-1,2,3-triazol-1-yl)propanamido)-4-methylpentanoic acid (**25**):**

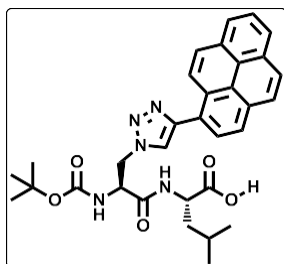

Using the general procedure of methyl ester hydrolysis, starting from 215 mg (0.368 mmol) of **24**, 194 mg (0.34 mmol) of the title compound **25** was isolated as a yellowish brown gummy material (Si-gel, CH<sub>3</sub>Cl:MeOH = 10:1). Yield 93%; <sup>1</sup>H NMR (CDCl<sub>3</sub>; d<sub>6</sub>-DMSO; 400 MHz); δ 0.82 (6H, m); 1.30 (9H, s); 1.37-1.30 (1H, m); 1.65-1.56 (2H, m); 4.37 (1H, bs); 4.73 (2H, d, *J* = 8.4 Hz); 5.51-4.90 (1H, m); 6.57 (1H, d, *J* = 7.6 Hz); 7.89 (1H, s); 8.00-7.94 (1H, m); 8.03 (2H, bs); 8.06 (1H, bs); 8.13 (1H, t, *J* = 4.0 Hz); 8.15 (1H, s); 8.17 (2H, d, *J* = 2.8 Hz); 8.34 (1H, s); 8.64 (1H, d, *J* = 7.2 Hz); <sup>13</sup>C NMR (CDCl<sub>3</sub>; d<sub>6</sub>-DMSO; 100 MHz); δ 21.3, 22.8, 24.2, 28.1, 35.9, 40.2, 50.8, 54.1, 79.1, 124.1, 124.4, 124.7, 124.8, 124.9, 125.1, 126.1, 126.8, 127.1, 127.2, 127.4, 127.6, 128.1, 130.3, 130.5, 130.8, 146.1, 155.1, 162.1, 168.6, 174.3. HRMS calcd for C<sub>32</sub>H<sub>34</sub>N<sub>5</sub>O<sub>5</sub> ([M - H]<sup>-</sup>) 568.2565, found 568.5032.

**3.3.11. Synthesis of tert-butyl ((S)-1-(((S)-1-((3-(1-(3-(((S)-1-(((S)-1-(methoxy(methyl)amino)-1-oxo-3-(4-(pyren-1-yl)-1H-1,2,3-triazol-1-yl)propan-2-yl)amino)-4-methyl-1-oxopentan-2-yl)carbamoyl)phenyl)-1H-1,2,3-triazol-4-yl)phenyl)amino)-4-methyl-1-oxopentan-2-yl)amino)-1-oxo-3-(4-(pyren-1-yl)-1H-1,2,3-triazol-1-yl)propan-2-yl)carbamate (**2**):**

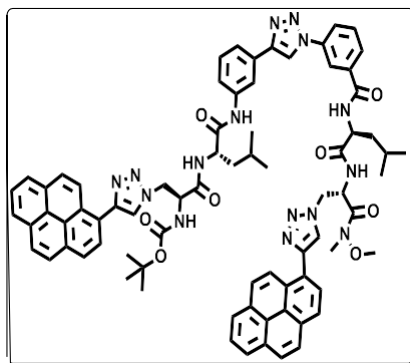

Starting material **25**, 160 mg (0.281 mmol) was taken in a dry 50 ml RB. With creating nitrogen atmosphere and maintaining 0 °C temperature by ice bath we are added dry THF solvent, ethyl chloroformate and tri-ethylamine followed by. Then free amine of tripeptide **19**, 218 mg (0.281 mmol) was added to the reaction mixture and

allowed to stirrer about half an hour. After removing ice bath the reaction mixture was refluxed approximate 4 to 5 hour and monitored by TLC. The pure product **2**, 156 mg (0.12 mmol) was isolated as a solid material (CH<sub>3</sub>Cl:MeOH = 10:1). Yield 42%. IR (KBr) 3440, 3323, 2953, 2914, 2849, 1716, 1653, 1586, 1539, 1497, 1388, 1367, 1156, 1052, 849, 757 cm<sup>-1</sup>. <sup>1</sup>H NMR (d<sub>6</sub>-DMSO; 600 MHz) δ 0.83 (6H, bs); 0.92 (6H, dd, *J* = 6.6 Hz, 3 Hz); 1.31 (9H, s); 1.49 (1H, bs); 1.59 (1H, bs); 1.65-1.73 (4H, m);

3.18 (3H, s); 3.79 (3H, s); 4.56 (1H, bs); 4.62 (1H, bs); 4.77-4.70 (3H, m); 4.95 (2H, dd,  $J = 10.2$  Hz,  $12.6$  Hz); 5.39 (1H, bs); 7.26 (1H, d,  $J = 7.8$  Hz), 7.36 (2H, dt,  $J = 25.2$  Hz,  $7.8$  Hz); 7.52 (1H, d,  $J = 7.8$  Hz); 7.64 (1H, d,  $J = 7.8$  Hz); 7.78 (1H, d,  $J = 7.2$  Hz); 7.85 (1H, d,  $J = 7.8$  Hz); 8.03 (2H, dt,  $J = 22.2$  Hz,  $7.2$  Hz); 8.10 (1H, d,  $J = 9.0$  Hz); 8.20-8.17 (5H, m); 8.22 (1H, t,  $J = 6.6$  Hz); 8.31-8.24 (8H, m); 8.34 (1H, s); 8.48 (1H, d,  $J = 7.2$  Hz); 8.65 (1H, s); 8.68 (1H, s); 8.72 (1H, d,  $J = 7.2$  Hz); 8.75 (2H, d,  $J = 9.6$  Hz); 8.81 (1H, d,  $J = 9.6$  Hz); 9.1 (1H, s); 10.2 (1H, s);  $^{13}\text{C}$  NMR ( $\text{d}_6$ -DMSO; 150 MHz)  $\delta$  21.4, 21.5, 23.0, 23.1, 24.2, 24.3, 28.1, 31.5, 49.5, 49.9, 50.7, 52.1, 52.3, 54.3, 61.6, 78.8, 116.2, 118.8, 119.3, 119.6, 120.7, 122.4, 123.8, 123.9, 124.2, 124.3, 124.8, 124.9, 125.0, 125.1, 125.2, 125.3, 125.39, 125.4, 125.5, 126.3, 126.4, 126.9, 127.1, 127.2, 127.3, 127.4, 127.6, 127.8, 127.9, 129.4, 129.5, 130.3, 130.4, 130.5, 130.6, 130.8, 130.9, 135.3, 136.3, 139.4, 145.8, 146.1, 147.2, 155.1, 165.1, 168.9, 171.1, 172.4.; HRMS calcd for  $\text{C}_{76}\text{H}_{76}\text{N}_{15}\text{O}_8$  ( $[\text{M} + \text{H}]^+$ ) 1326.5998, found 1326.6014.

**3.3.12. Synthesis of ((S)-methyl 2-((S)-2-((tert-butoxycarbonyl)amino)-3-phenylpropanamido)-4-methylpentanoate (27):** Using the general procedure of

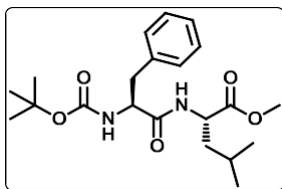

peptide coupling starting N-protected L-phenylalanine **26**, (1000 mg, 3.77 mmol), and the amine salt of methyl ester - L-leucine **22** (606 mg, 4.15 mmol), the title compound **27** (950 mg, 2.42 mmol) was isolated as white solid. Yield 64%;

IR (KBr) 3391, 3067, 2966, 2937, 1751, 1683, 1648, 1545, 1390, 1200, 703  $\text{cm}^{-1}$ .  $^1\text{H}$  NMR ( $\text{CDCl}_3$ ; 400 MHz)  $\delta$  0.90 (6H, t,  $J = 6$  Hz); 1.26 (1H, s); 1.432 (9H, s); 1.66-1.58 (2H, m); 3.10 (2H, ddd,  $J = 6$  Hz,  $9.2$  Hz); 3.694 (3H, s); 4.12 (1H, m); 4.84 (1H, d,  $J = 6.8$  Hz); 4.98 (1H, d,  $J = 7.6$ ); 6.66 (1H, d,  $J = 7.2$  Hz); 7.10 (2H, d,  $J = 7.6$  Hz); 7.29-7.20 (3H, m);  $^{13}\text{C}$  NMR ( $\text{CDCl}_3$ ; 100 MHz);  $\delta$  22.1, 22.7, 24.7, 28.4, 31.7, 38.1, 41.3, 52.4, 53.2, 80.1, 127.2, 128.6, 129.4, 135.9, 155.6, 171.8, 172.4. HRMS calcd for  $\text{C}_{21}\text{H}_{32}\text{N}_2\text{O}_5\text{Na}$  ( $[\text{M} + \text{Na}]^+$ ) 415.2201, found 415.2222.

**3.3.13. Synthesis of Boc deprotected ((S)-methyl 2-((S)-2-((tert-butoxycarbonyl)amino)-3-phenylpropanamido)-4-methylpentanoate (28):**

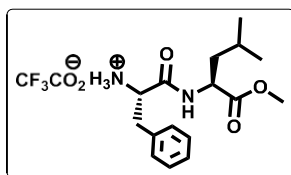

Using the general procedure of Boc-deprotection, compound **27** (212mg, 0.54 mmol) was deprotected. The product **28** was obtained in quantitative yield and were used without further purification and characterization.

**3.3.14. (S)-methyl-2-((S)-2-(3-(4-(3-((tert-butoxycarbonyl)amino)phenyl)-1H-1,2,3-triazol-1-yl)benzamido)-3-phenylpropanamido)-4-methylpentanoate (29):**

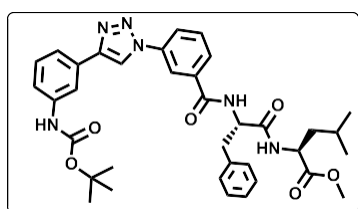

In a dry DMF, N-protected aromatic triazolyl amino acid <sup>Ar</sup>TAA, **1** (200 mg, 0.526 mmol) was taken in a dry R.B. Under ice cold condition 1-[3-dimethyl amino propyl]-3-ethylcarbo-diimide hydrochloride (EDC.HCl) (150.69 mg, 0.789 mmol), DMAP (192.52 mg, 1.578 mmol) were added and stirred for 15 minutes. After that the amine salt of methyl ester protected dipeptide **28** was added and the reaction mixture was stirred for another 18 h at 0 °C to room temperature. After completion of the reaction, the solvent was dried by rotary evaporator, after which it was partitioned between EtOAc and water (30 ml each). The organic layer was washed with brine solution. Pure product **29** (250 mg, 0.389 mmol) was separated in pure form by column chromatography (Si-gel, PE: EtOAc = 1:1) as solid compound. Yield 73%; <sup>1</sup>H NMR (d<sub>6</sub>-DMSO; 400 MHz) δ 0.85 (6H, dd, *J* = 6 Hz, 16.8 Hz); 1.49 (9H, s); 1.56-1.52 (1H, m); 1.69-1.59 (2H, m); 3.00 (1H, t, *J* = 12.4 Hz); 3.14 (1H, dd, *J* = 3.2 Hz, 13.6 Hz); 3.62 (3H, s); 4.32 (1H, m); 4.84 (1H, m); 7.17 (1H, q, *J* = 8.0 Hz); 7.26 (2H, t, *J* = 7.6 Hz); 7.37 (3H, s); 7.39 (1H, s); 7.52-7.50 (1H, m); 7.70 (1H, t, *J* = 8 Hz); 7.94-7.89 (1H, m); 8.10 (1H, dt, *J* = 1.2 Hz, 8.4 Hz); 8.21 (1H, s); 8.36 (1H, s); 8.58 (1H, d, *J* = 7.6 Hz); 8.87 (1H, d, *J* = 8 Hz); 9.25 (1H, s); 9.51 (1H, s); <sup>13</sup>C NMR (d<sub>6</sub>-DMSO; 100 MHz); δ 21.4, 22.8, 24.3, 28.2, 37.1, 40.1, 50.5, 51.9, 54.7, 79.2, 115.1, 118.3, 119.1, 119.5, 119.7, 122.8, 126.3, 127.5, 128.1, 129.2, 129.3, 129.4, 130.0, 130.6, 135.7, 136.6, 138.2, 140.2, 147.6, 152.9, 165.2, 171.7, 172.9. HRMS calcd for C<sub>36</sub>H<sub>43</sub>N<sub>6</sub>O<sub>6</sub> ([M + H]<sup>+</sup>) 655.3239, found 655.3231.

**3.3.15. Synthesis of (S)-methyl 2-((S)-2-(3-(4-(3-aminophenyl)-1H-1,2,3-triazol-1-yl)benzamido)-3-phenylpropanamido)-4-methylpentanoate (30):**

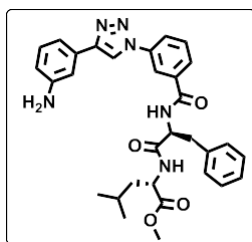

Using the general procedure of Boc-deprotection, we are getting the free amine derivative of compound **29** (212mg, 0.54 mmol). The product **30** was obtained in quantitative yield and were used without further purification and characterization.

**3.3.16. (S)-methyl-2-((S)-2-(3-(4-(3-((S)-2-((tert-butoxycarbonyl)amino)-3-(4-hydroxyphenyl)propanamido)phenyl)-1H-1,2,3-triazol-1-yl)benzamido)-3-phenylpropanamido)-4-methylpentanoate (3):**

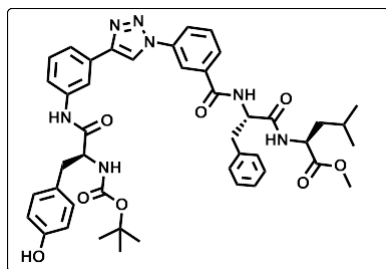

In a dry THF at 0 °C temperature N-Boc tyrosine (60.93 mg, 0.213 mmol), ethyl chloroformate (24 μl, 0.256 mmol) and trimethyl amine (35 μl, 0.256 mmol) were added. After five minutes free amine and C-terminal protected tripeptide **30** (106 mg, 0.192 mmol) was added and stirred at half an hour at cold condition. Then reaction

mixture was refluxed about 4 to 5 hour and reaction monitor by TLC. After completion of the reaction, the solvent was dried by rotary evaporator, after which it was partitioned between EtOAc and water (50 ml each). The organic layer was washed with brine solution. Pure product **3** (80 mg, 0.098 mmol) was isolated in pure form by column chromatography (Si-gel, PE : EtOAc = 1:1) as solid compound. Yield 46%; IR (KBr) 3441, 3331, 2953, 2923, 1744, 1670, 1519, 1439, 1371, 1236, 1164, 1045, 789, 688 cm<sup>-1</sup>. <sup>1</sup>H NMR (d<sub>6</sub>-DMSO; 600 MHz) δ 0.89 (6H, dd, *J* = 5.4 Hz, 12.6 Hz); 1.33 (9H, s); 1.52 (1H, bs); 1.65 (2H, bs); 2.74 (1H, d, *J* = 12.4 Hz); 2.89 (1H, bs); 3.01 (2H, ddd, *J* = 5.4 Hz, 16.8 Hz); 3.57 (3H, s); 4.26 (1H, bs); 4.48 (1H, q, *J* = 5.4 Hz); 4.62 (1H, bs); 6.65 (2H, d, *J* = 7.2 Hz); 7.05 (1H, d, *J* = 7.8 Hz); 7.12 (2H, d, *J* = 7.8 Hz); 7.15 (1H, s); 7.21 (4H, s); 7.44 (1H, t, *J* = 7.8 Hz); 7.61 (2H, dd, *J* = 7.2 Hz, 15.6 Hz); 7.74 (1H, t, *J* = 7.8 Hz); 8.01 (1H, d, *J* = 7.8 Hz); 8.13 (1H, d, *J* = 7.2 Hz); 8.27 (1H, s); 8.43 (1H, s); 8.45 (1H, s); 8.67 (1H, d, *J* = 7.8 Hz); 9.19 (1H, s); 9.32 (1H, s); 10.17 (1H, s); <sup>13</sup>C NMR (d<sub>6</sub>-DMSO; CDCl<sub>3</sub>; 150 MHz); δ 22.2, 22.8, 24.9, 28.3, 37.7, 40.9, 52.4, 52.5, 53.5, 54.0, 57.4, 80.3, 115.6, 116.9,

117.9, 118.0, 119.7, 121.2, 123.4, 127.0, 128.0, 128.1, 128.6, 129.0, 130.0, 130.2, 130.3, 130.7, 134.7, 136.1, 136.7, 147.6, 155.6, 156.5, 166.2, 171.9, 173.5 HRMS calcd for  $C_{45}H_{52}N_7O_8$  ( $[M + H]^+$ ) 818.3872, found 818.3871.

## 4. Spectroscopic Evidences of Various Interactions and $\beta$ -sheet like Structures in the Peptides 2 and 3

### 4.1. Study of Circular Dichroism Spectroscopy

Circular dichroism spectra were recorded using a CD spectropolarimeter with a cell path length of 1 mm at in different solvent at room temperature and variable temperature. All the samples were prepared in spectroscopic grade solvent with 100  $\mu$ M concentration.

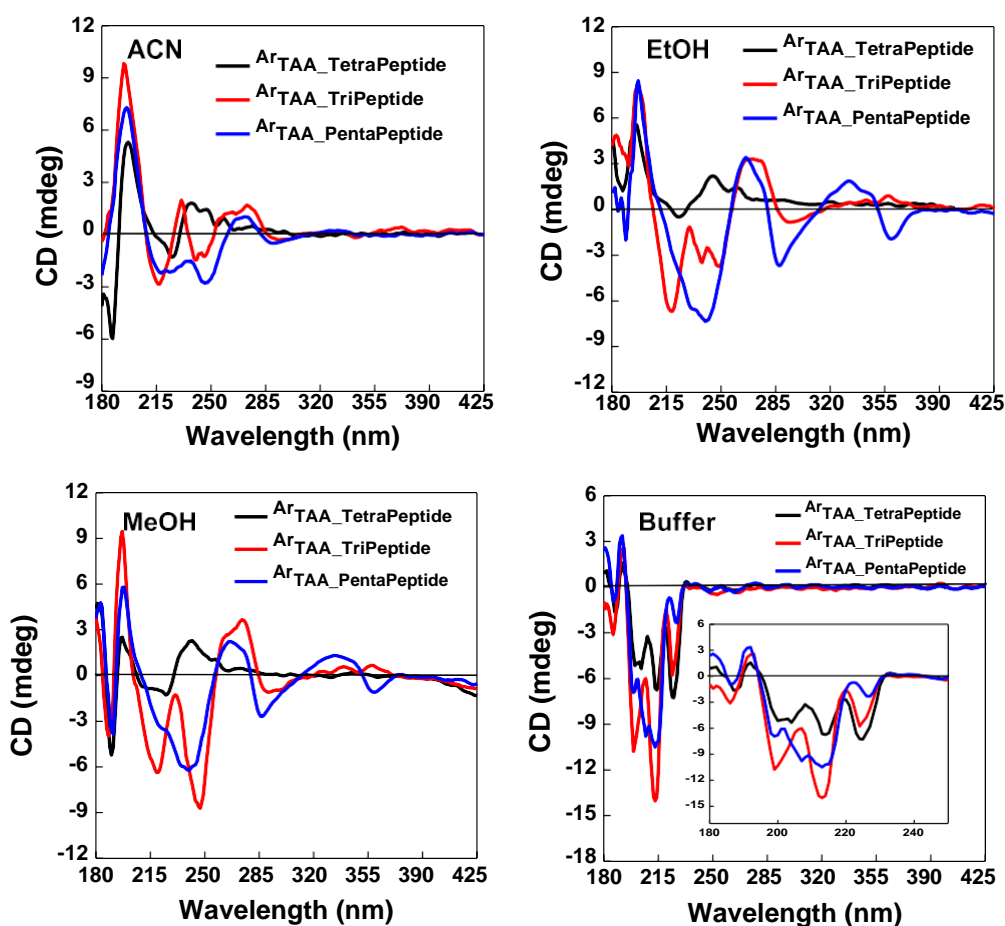

**Figure S1.** CD spectra of synthesized peptides **2**, **3** and **18** in different solvent (100  $\mu$ M concentration; r.t.).

The fluorescent Pentapeptide **2** showed a strong positive band at around 194 nm and a broad negative band at around 215-239 nm indicating sheet conformation. Moreover, the signature of negative band at 287 nm due to aromatic scaffold and positive bands at 331 and 360 nm indicated the absorption of the fluorescent triazolyl pyrene with  $\pi$ - $\pi$  stacking interaction between two terminal triazolyl pyrene moiety, which also supported from variable temperature CD spectra in EtOH solvent (Fig. S3).

The tetrapeptide **3** containing the aromatic scaffold in the backbone showed a positive band at 197 nm and a broad negative band at around 209-225 nm indicating sheet conformation. Moreover, the presence of a positive band at 238 and 276 nm signified the absorption of chiral aromatic triazolyl amino acid scaffold as well of the tyrosine in the tetrapeptide **3**. Overall, the our synthesized peptides **2** and **3** showed  $\beta$ -sheet like structure with turn conformation (Fig. S1).

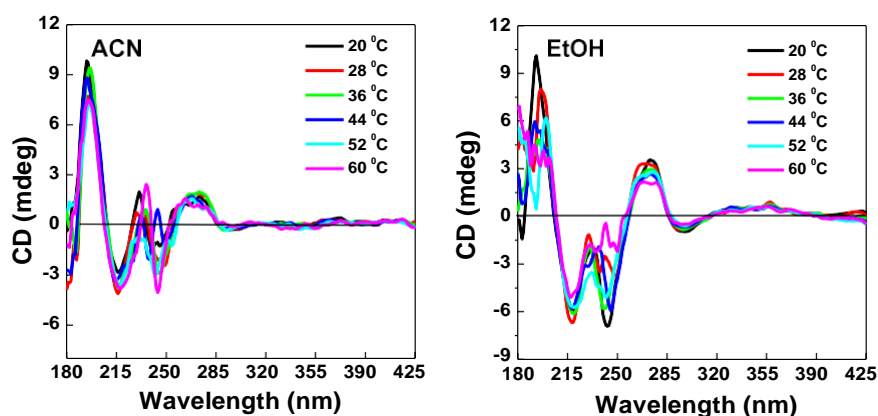

**Figure S2.** Variable temperature CD spectra of synthesized tripeptides **18** in acetonitrile & ethanol solvent (100  $\mu$ M concentration).

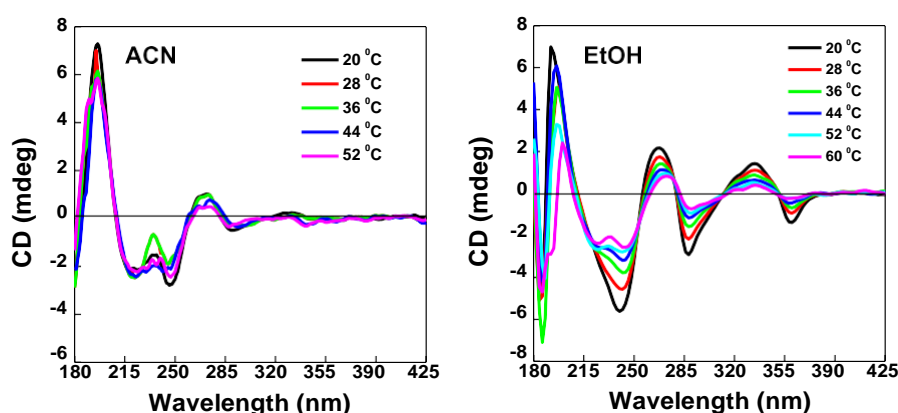

**Figure S3.** Variable temperature CD spectra of synthesized pentapeptide **2** in acetonitrile & ethanol solvent (100  $\mu$ M concentration).



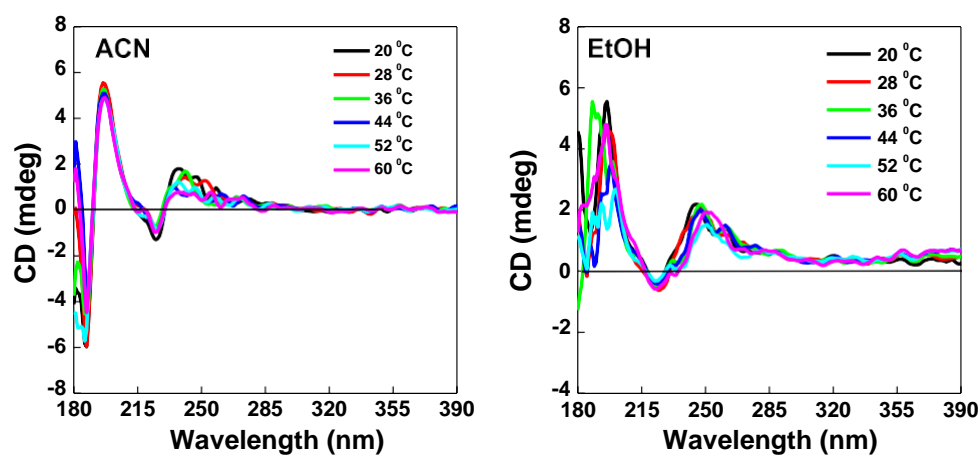

**Figure S4.** Variable temperature CD spectra of synthesized tetrapeptide **3** in acetonitrile & ethanol solvent (100  $\mu$ M concentration).

#### 4.2. Infrared Spectroscopy

IR spectra were recorded using dry KBr with solid and dry compound.

**Table S1.** Summary table of IR spectra

| Peptides       | Free N-H ( $\text{cm}^{-1}$ ) | H bonded N-H ( $\text{cm}^{-1}$ ) |
|----------------|-------------------------------|-----------------------------------|
| Pentapeptide_2 | 3440                          | 3323                              |
| Tetrapeptide_3 | 3441                          | 3331                              |

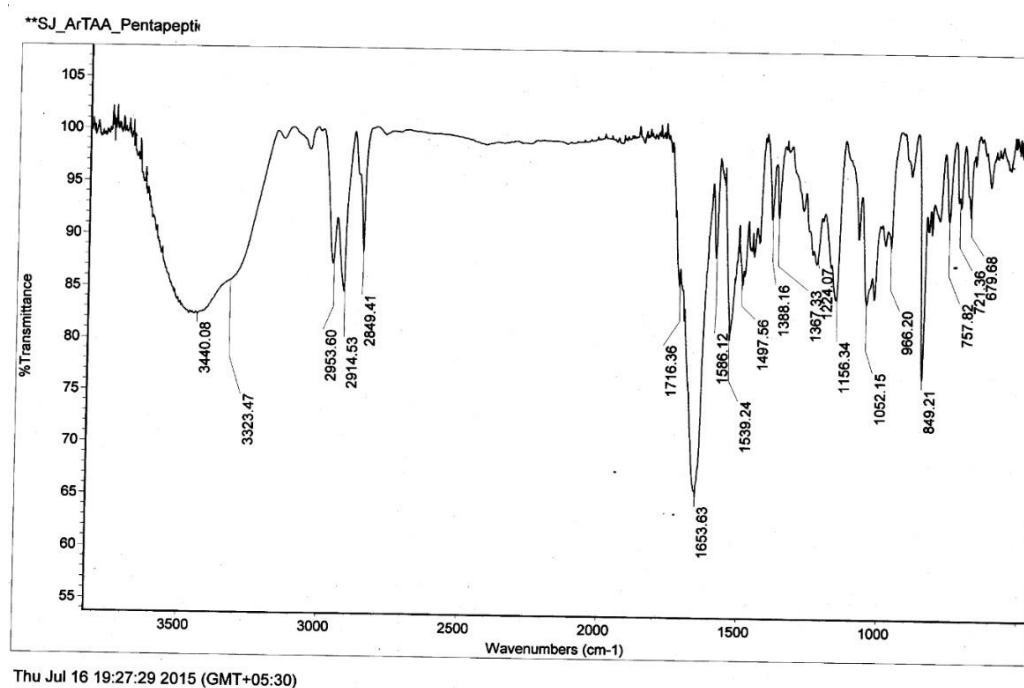

**Figure S5.** IR spectra of **Pentapeptide 2**

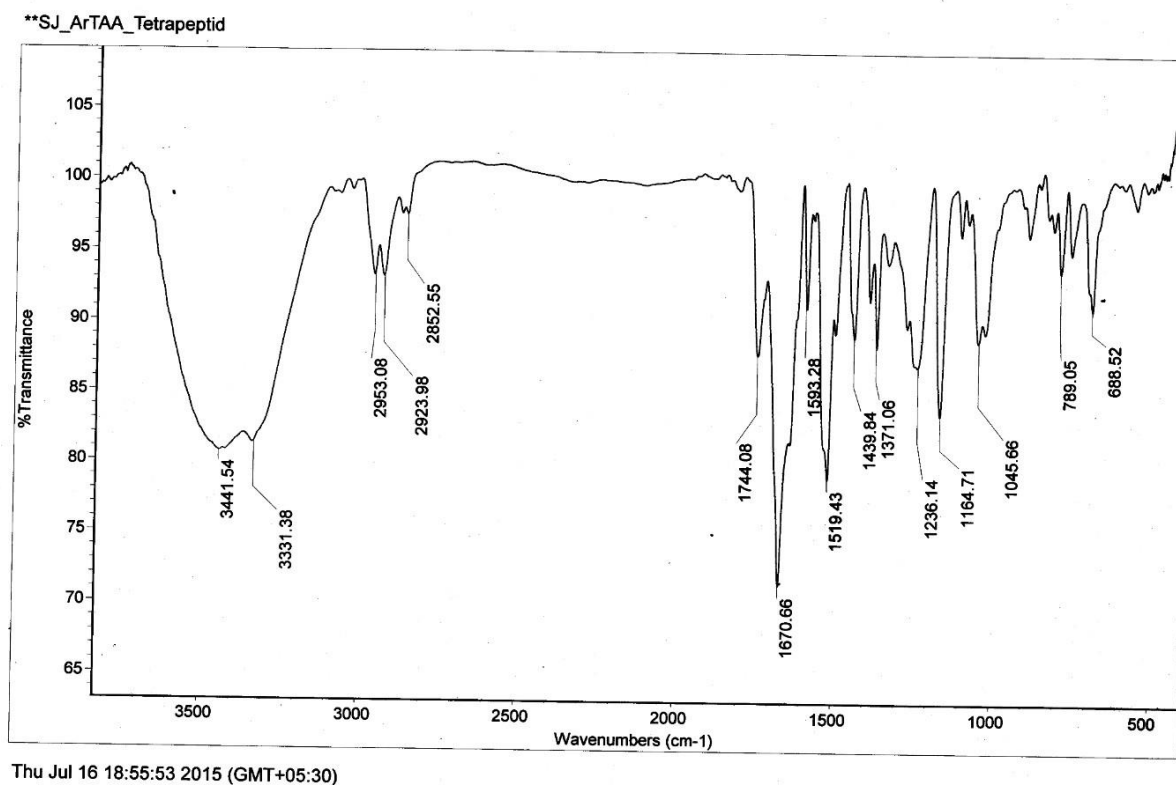

**Figure S6.** IR spectra of **Tetrapeptide 3**

#### 4.3. Variable Temperature <sup>1</sup>H NMR Data of Peptide 2 and 3.

**Table S2.** Values of temperature coefficients of chemical shifts of amide NH's or triazole-CH's in Pentapeptide 2.

| Kessler limit ( $\Delta\delta/\Delta T$ ) ppb/k |              |
|-------------------------------------------------|--------------|
| N_terminal_Ser_NH1                              | - 4.45 ppb/k |
| N_terminal_Leu_NH2                              | - 4.37 ppb/k |
| N_terminal <sup>Py</sup> Tz_CH1                 | - 1.27 ppb/k |
| C_terminal <sup>Py</sup> Tz_CH3                 | -1.79 ppb/k  |
| C_terminal_Leu_NH4                              | -4.31 ppb/k  |
| N_terminal_Ser_NH5                              | -6.1 ppb/k   |
| <sup>Ar</sup> TAA_NH3                           | -4.86 ppb/k  |
| <sup>Ar</sup> TAA_CH2                           | -3.13 ppb/k  |

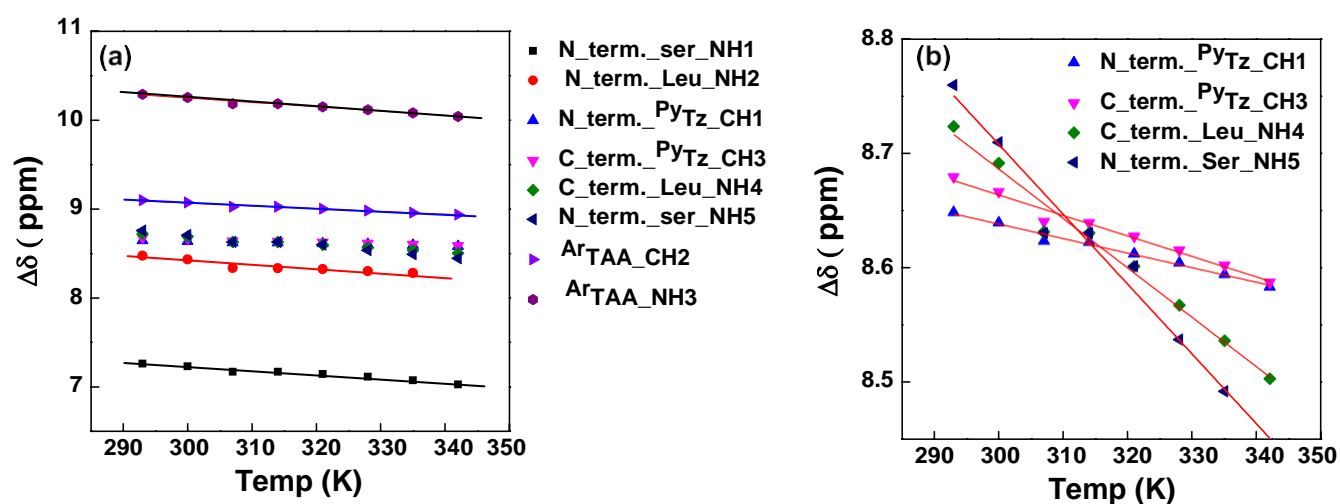

**Figure S7.** Temperature dependence of amide-NH/triazole-CH chemical shift of Pentapeptide 2.

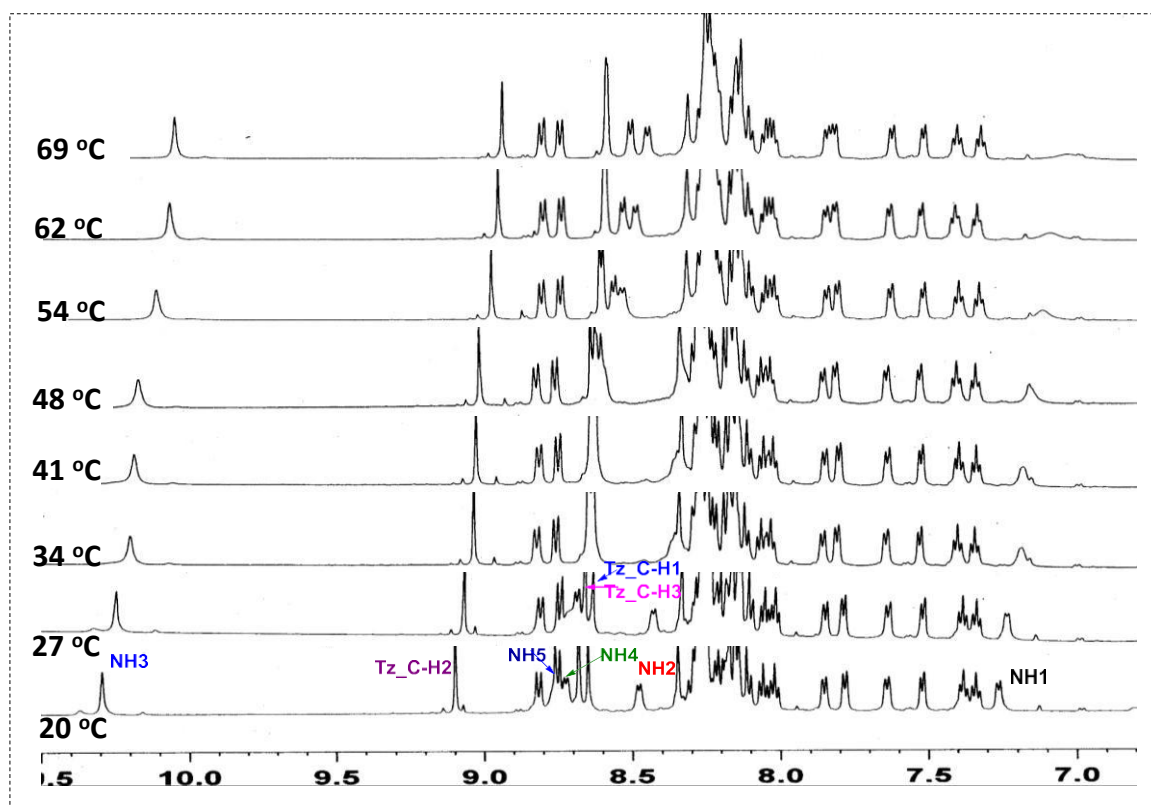

**Figure S8.** Variable temperature  $^1\text{H}$  NMR spectra of Pentapeptide 2 in  $\text{d}_6$ -DMSO showing temperature dependence of amide-NH/triazole-CH chemical shift.

**Table S3.** Values of temperature coefficients of chemical shifts of amide NH's or triazole-CH in tetrapeptide\_3.

| Kessler limit ( $\Delta\delta/\Delta T$ ) ppb/k |              |
|-------------------------------------------------|--------------|
| N_terminal_Tyr_NH1                              | - 8.68 ppb/k |
| <sup>Ar</sup> TAA_NH2                           | - 6.29 ppb/k |
| C_terminal_Phe.ala_NH3                          | -7.2 ppb/k   |
| C_terminal _ Leu_NH4                            | -4.51 ppb/k  |
| <sup>Ar</sup> TAA_triazole_CH1                  | -3.02 ppb/k  |
| Tyr_OH                                          | -5.56 ppb/k  |

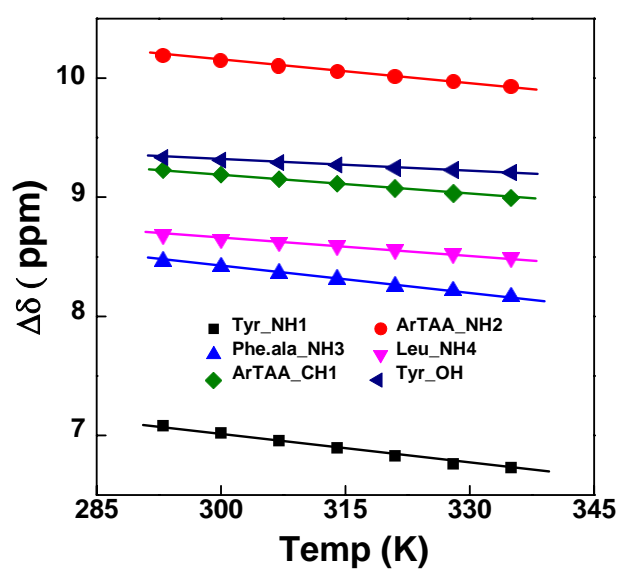

**Figure S9.** Temperature dependence of amide-NH/triazole-CH chemical shift of tetrapeptide 3.

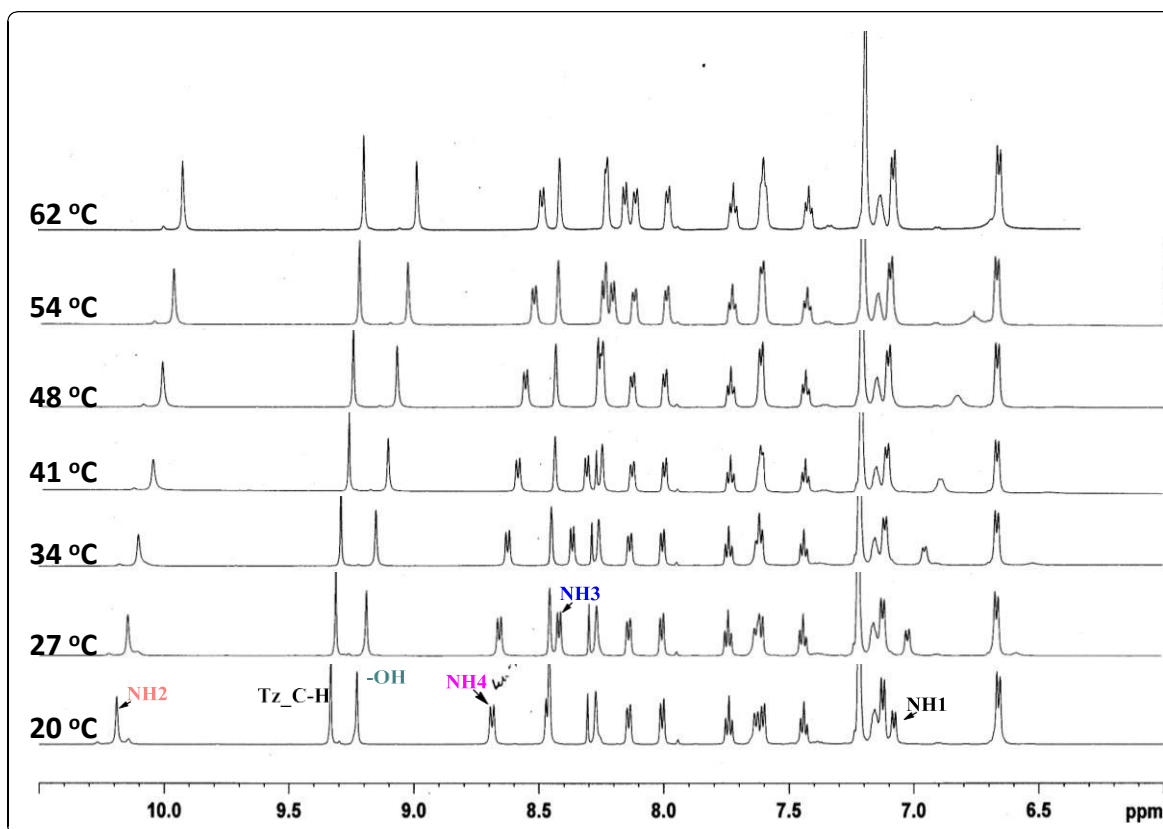

**Figure S10.** Variable temperature <sup>1</sup>H NMR spectra of tetrapeptide **3** in d<sub>6</sub>-DMSO showing temperature dependence of amide-NH/triazole-CH chemical shift.

## 4.4. Conformational Analysis of Peptides 2 and 3 by 2D NMR Spectroscopy.

### 4.4.1. Conformational Analysis of Pentapeptide 2

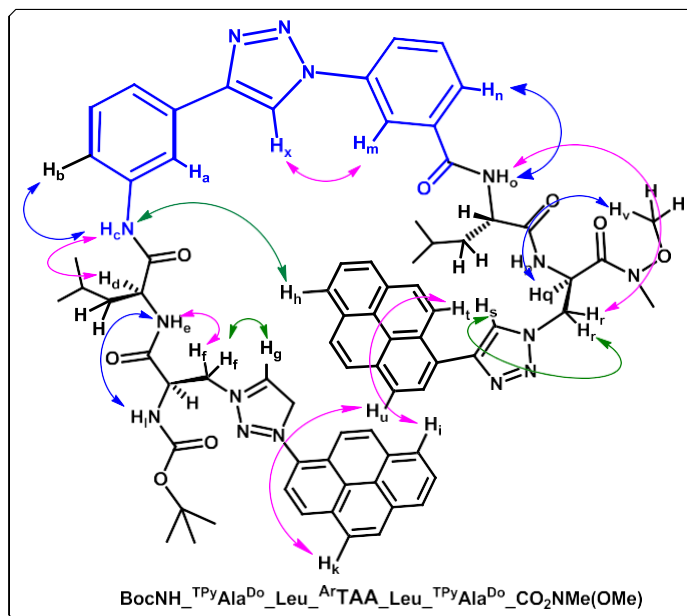

SSB-SJ-316- NOESY

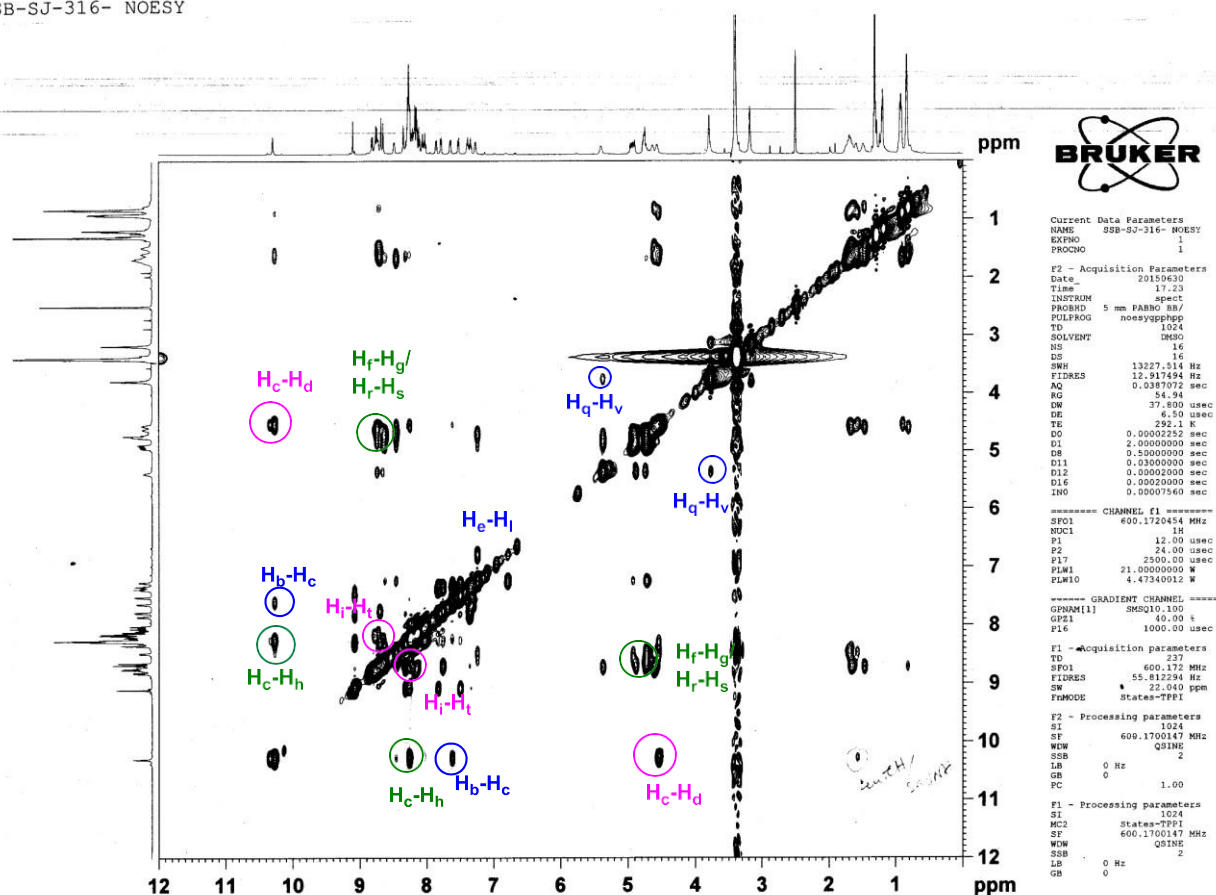

Figure S11. NOESY Spectra of synthesized Pentapeptide 2.

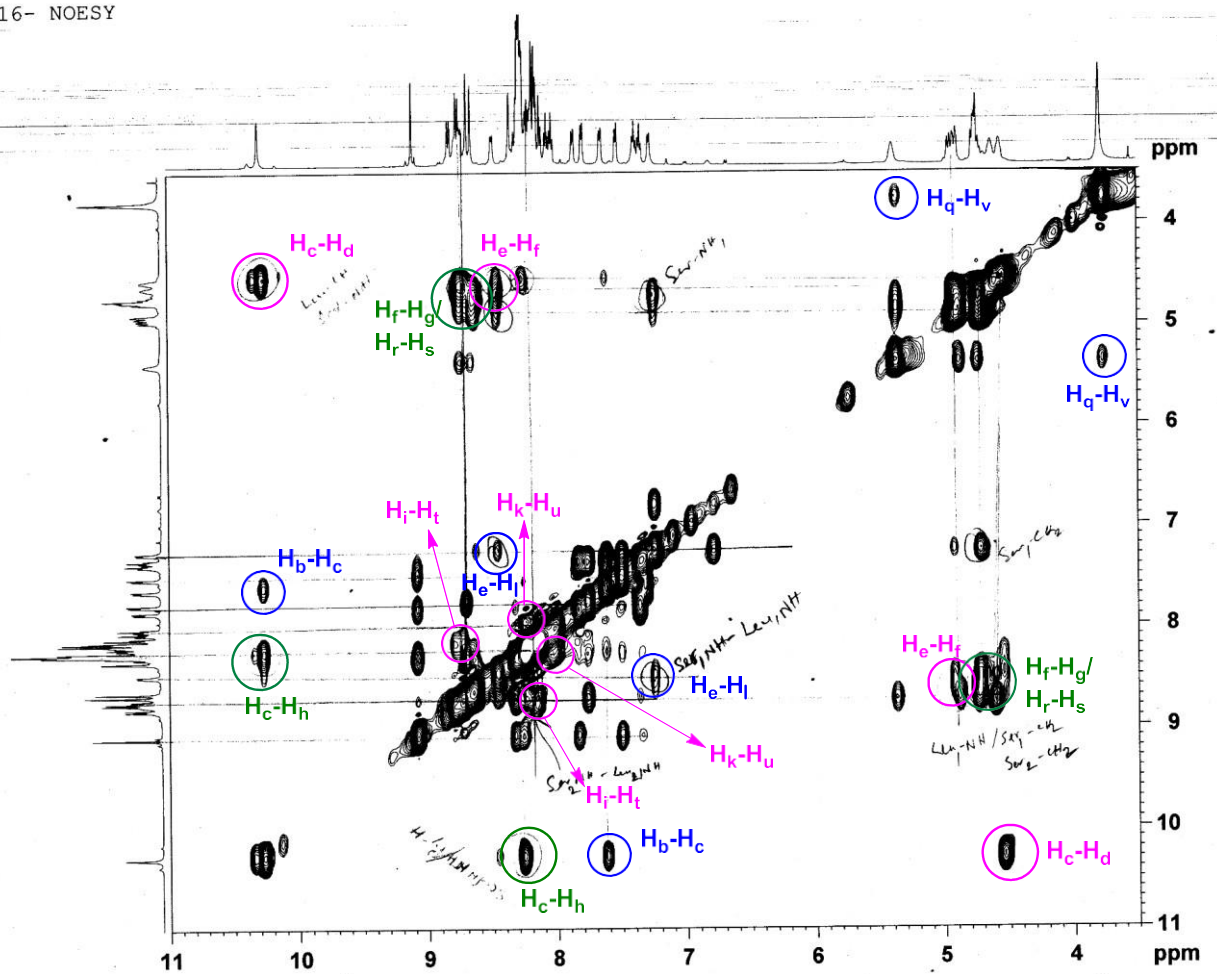

**Figure S12.** Expanded NOESY Spectra of synthesized **Pentapeptide 2**.

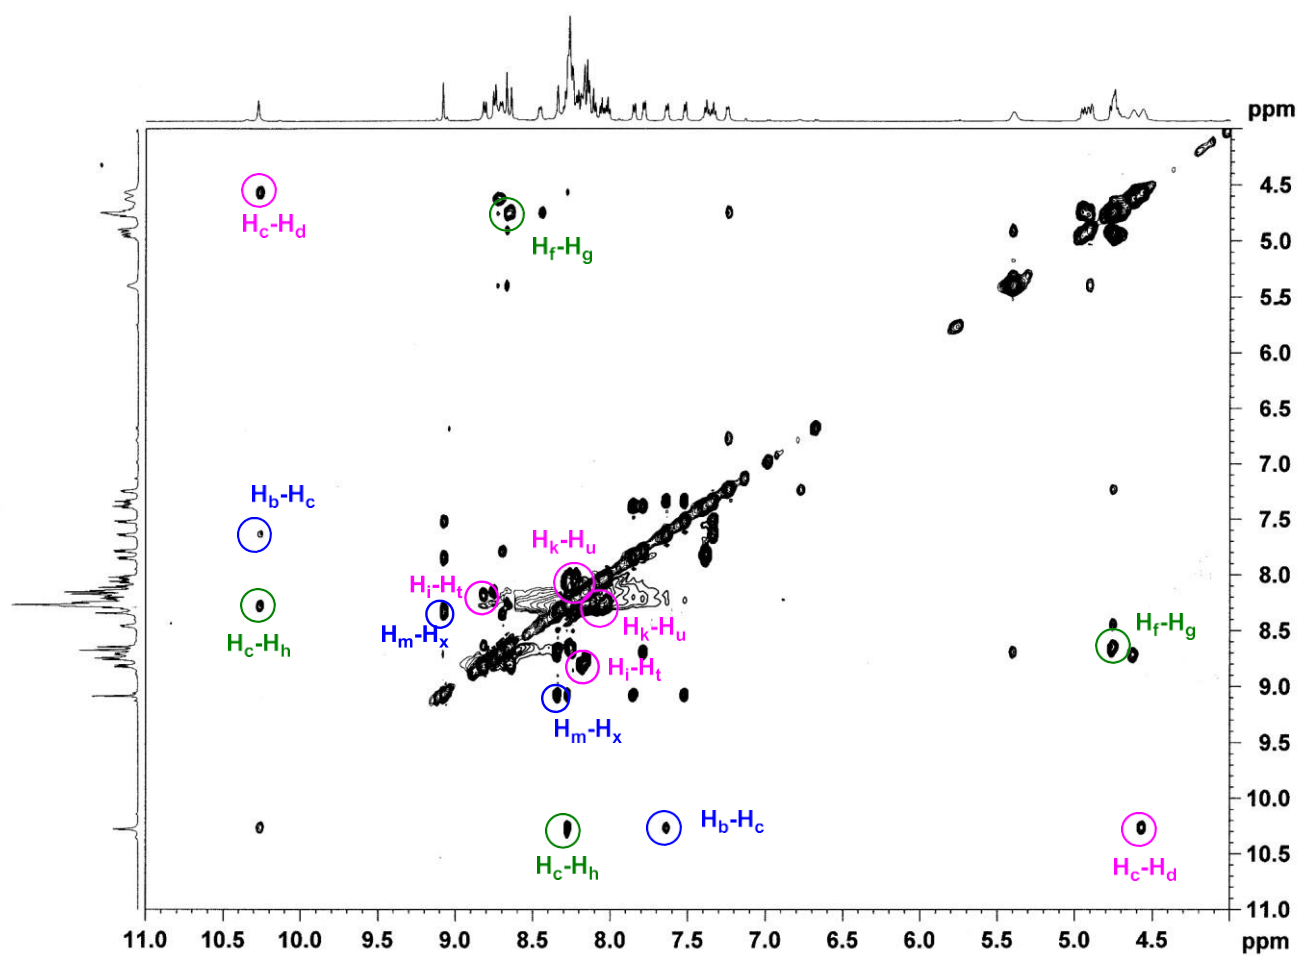

**Figure S13.** Expanded ROESY Spectra of synthesized **Pentapeptide 2**.



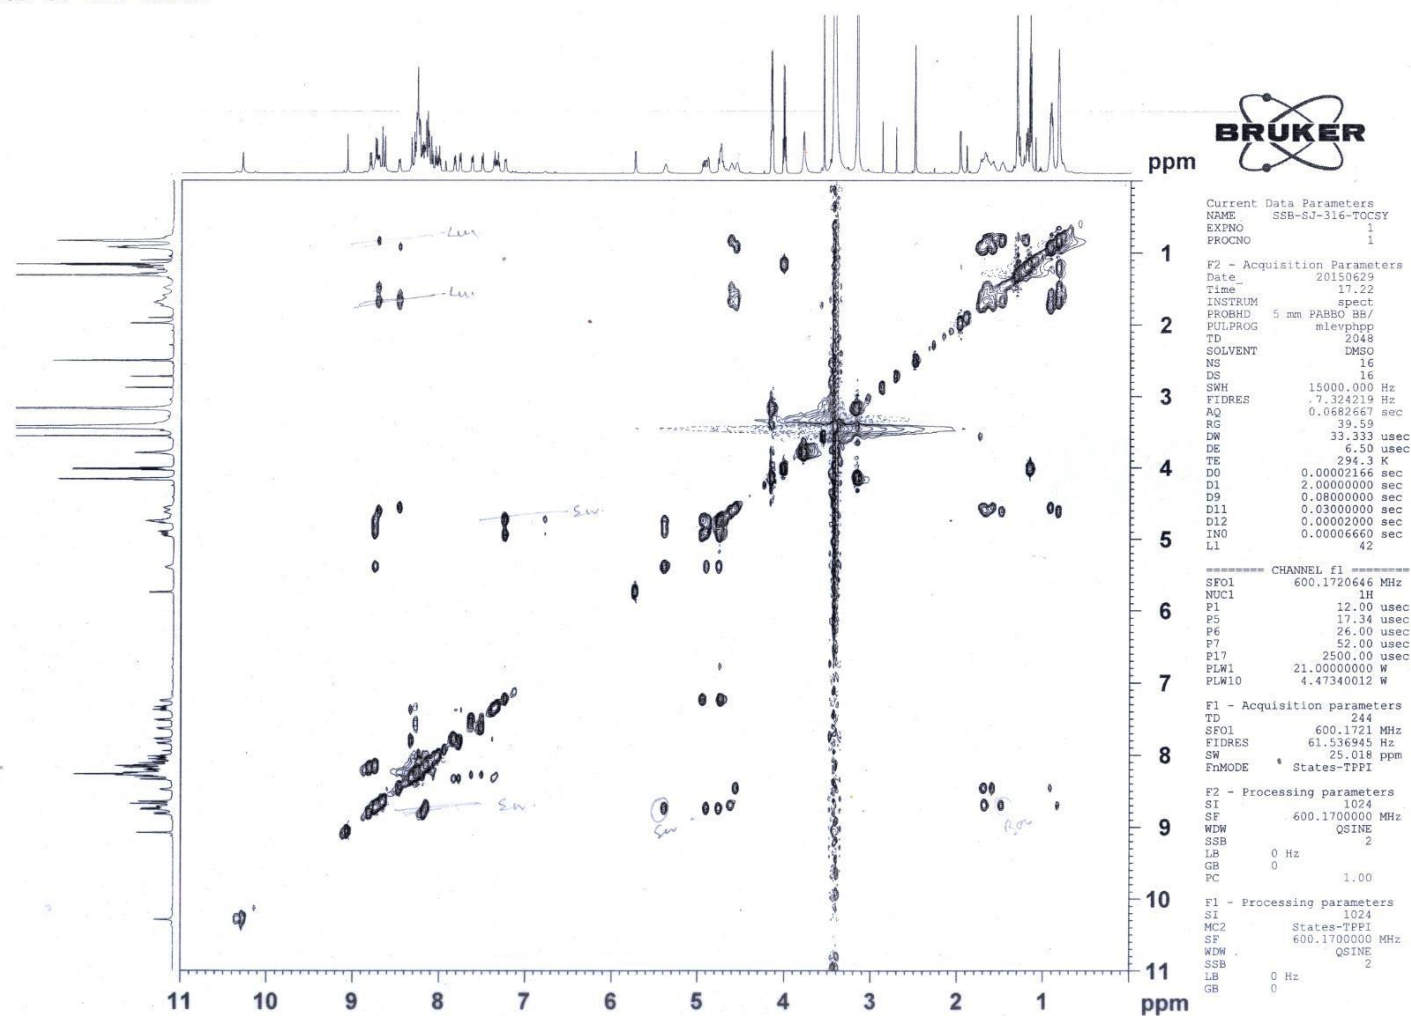

**Figure S14.** TOCSY Spectra of synthesized **Pentapeptide 2**.

#### 4.4.2. Conformational Analysis of Tetrapeptide 3

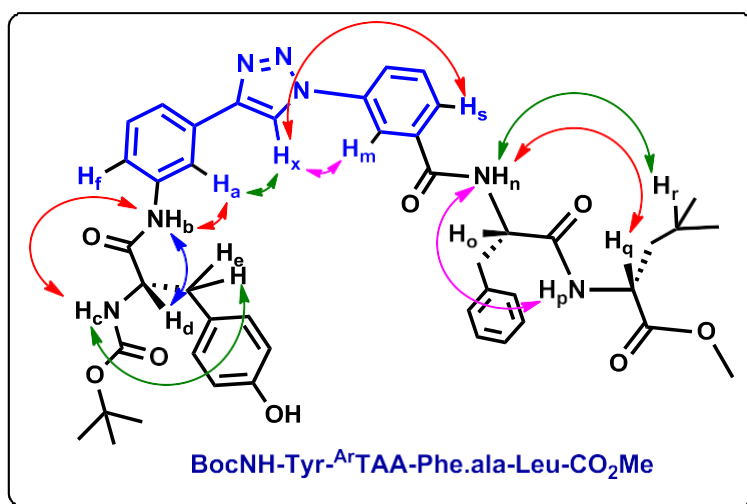

SSB-SJ-SP-13-500ms-NOESY

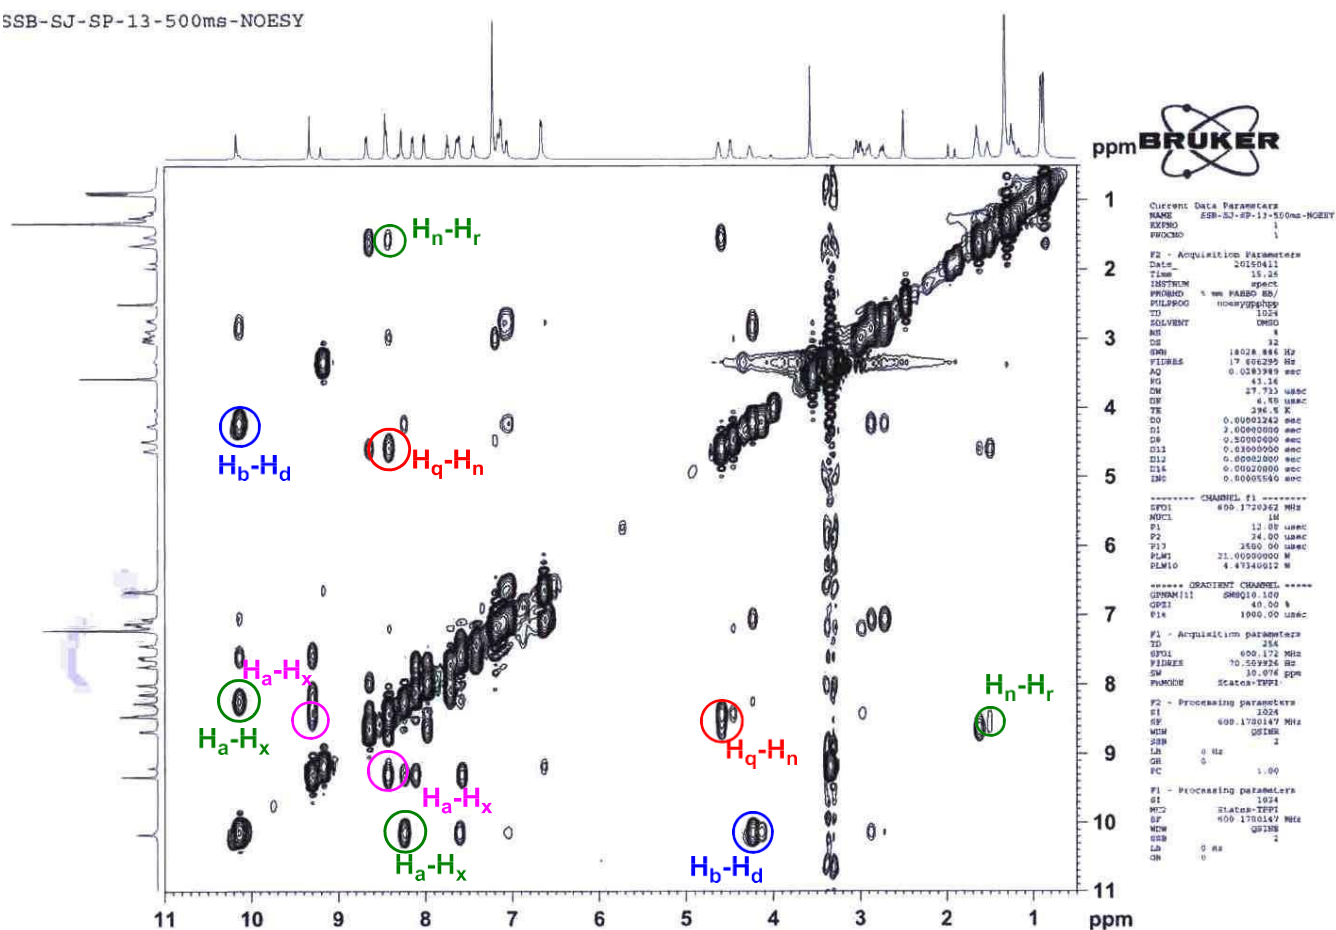

Figure S15. NOESY Spectra of synthesized tetrapeptide 3.

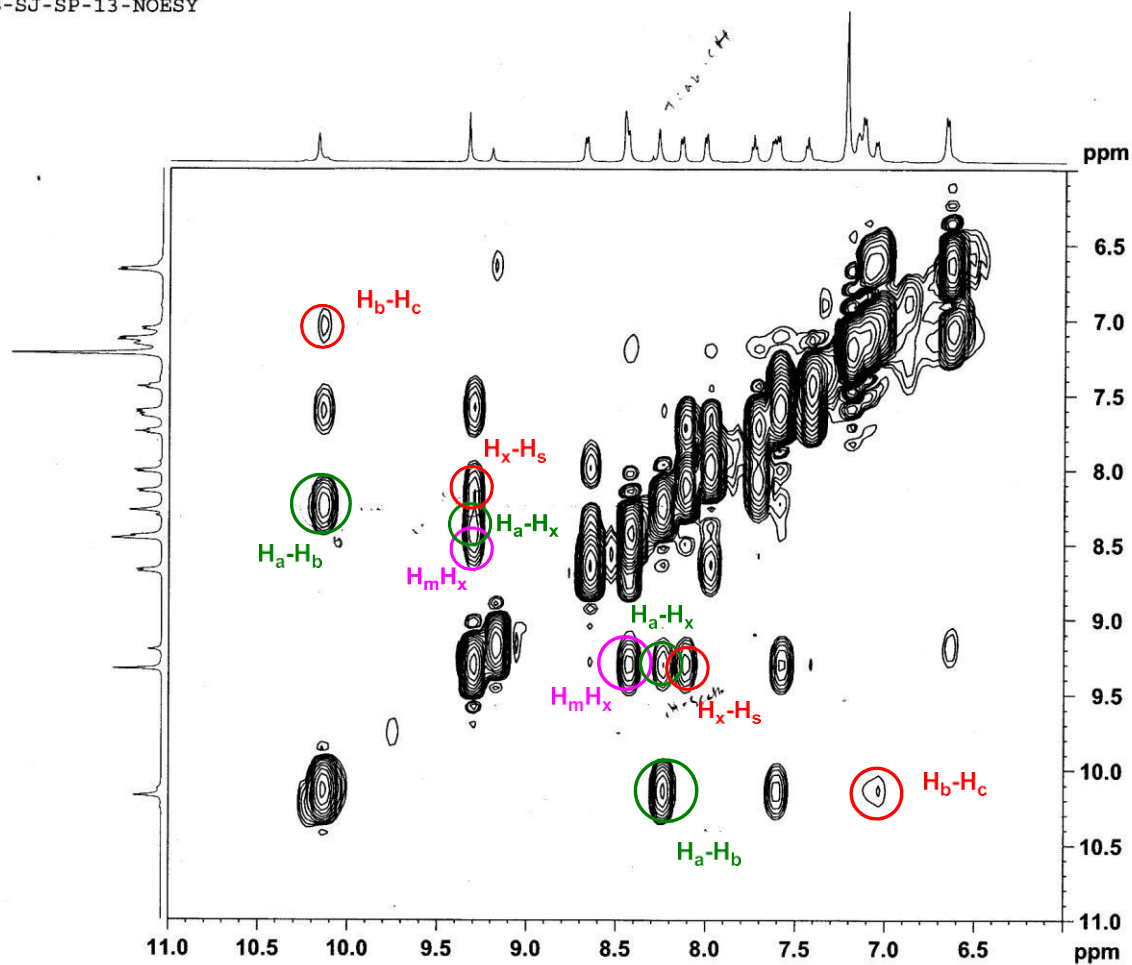

**Figure S16.** Expanded NOESY Spectra of synthesized **tetrapeptide 3**.

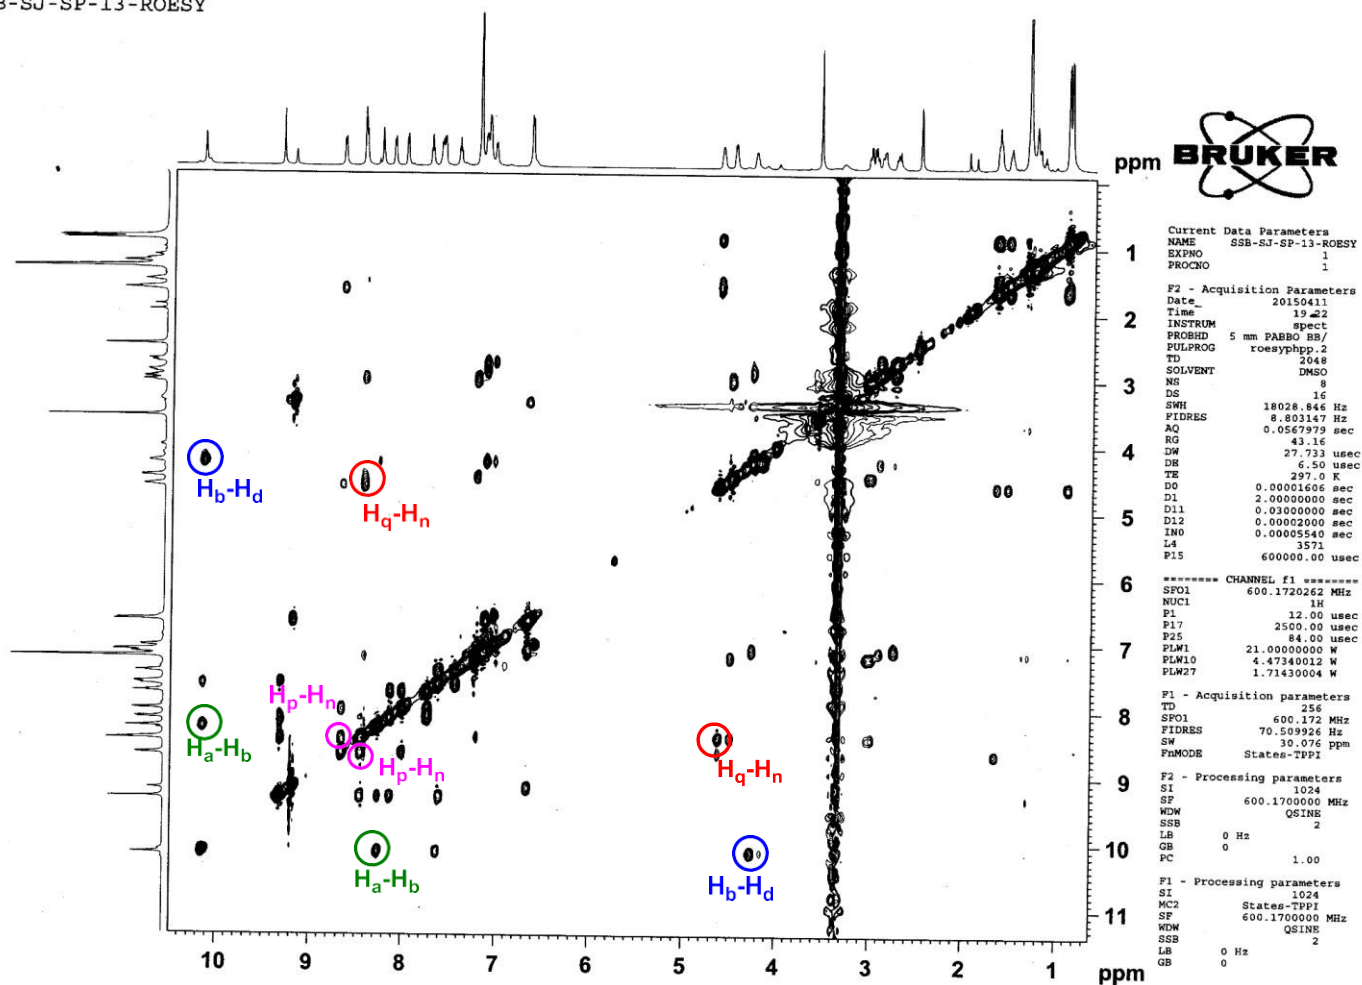

Figure S17. ROESY Spectra of synthesized tetrapeptide 3.

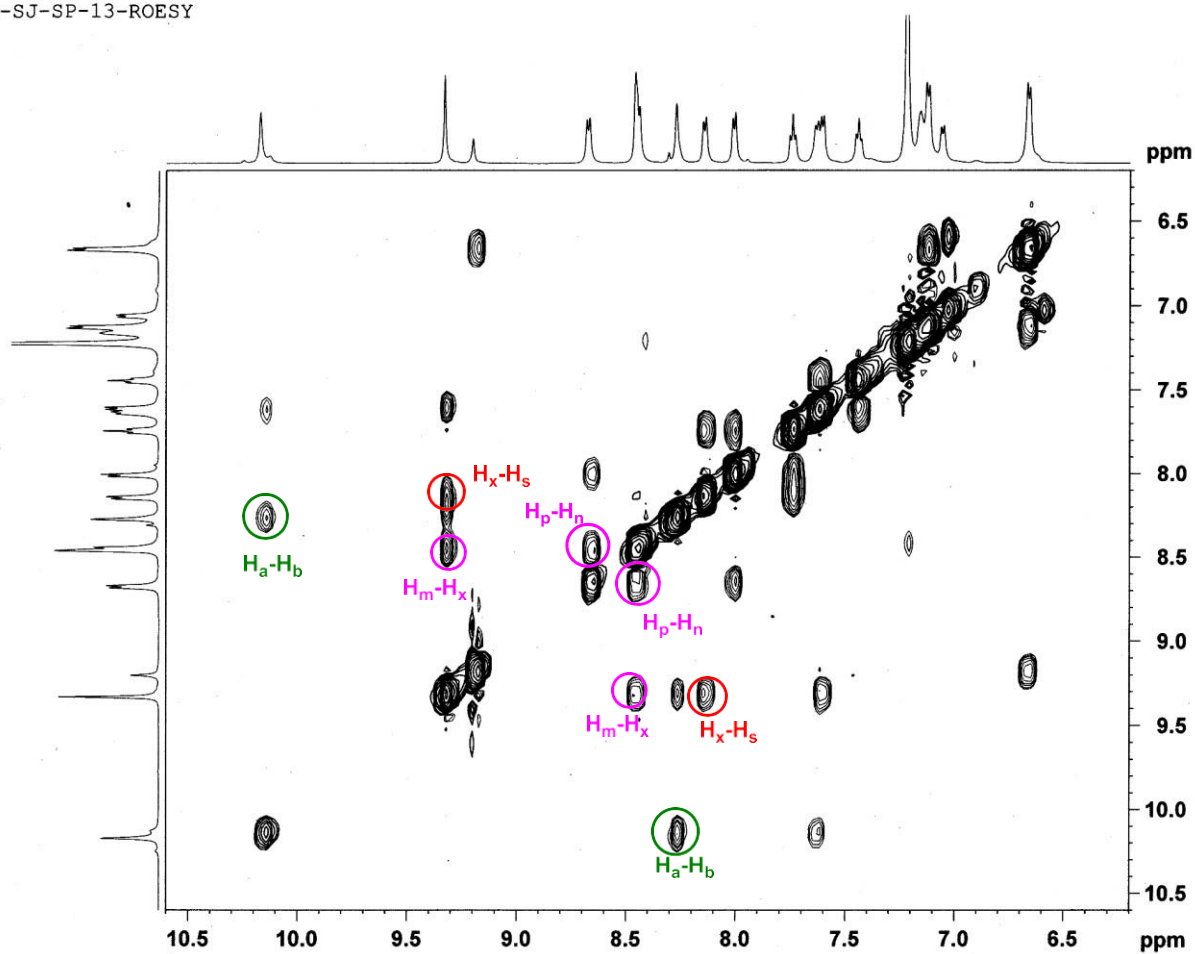

**Figure S18.** Expanded ROESY Spectra of synthesized **tetrapeptide 3**.

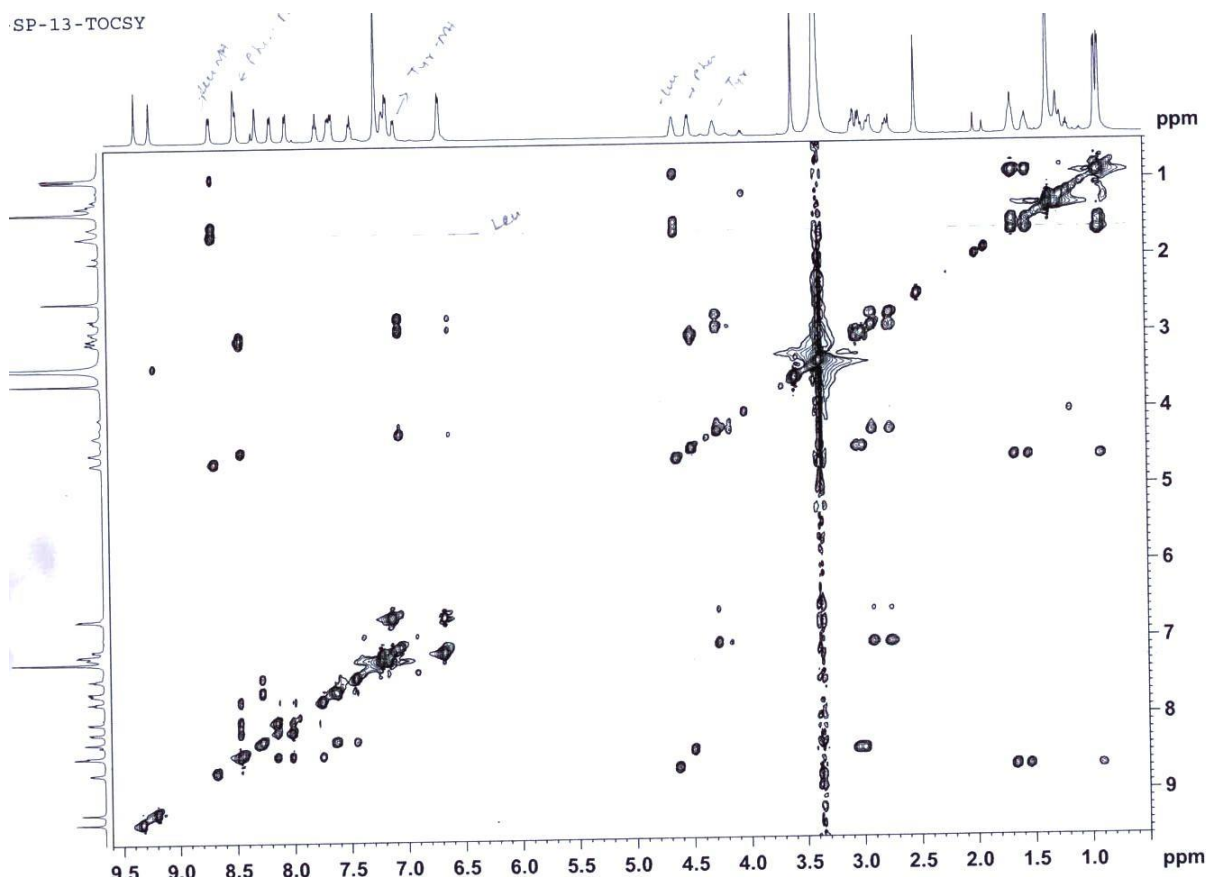

**Figure S19.** TOCSY Spectra of synthesized **tetrapeptide 3**.

## **5. Macro Model Study and Molecular Dynamics Simulation for peptide 2 and 3.**

### **5.1. Optimization Structure of Peptides and Conformational Search of Optimized Structures**

We are using Schrodinger Macromodel (Maestro vs. 9.1) software with OPLS 2005 force field in water for minimized the structure of our synthesized peptides. A conjugate gradient minimization scheme [PRCG (Polak-Ribiere Conjugate Gradient)] that uses the Polak-Ribiere first derivative method with restarts every 3N iterations was employed for the minimization of the peptides.

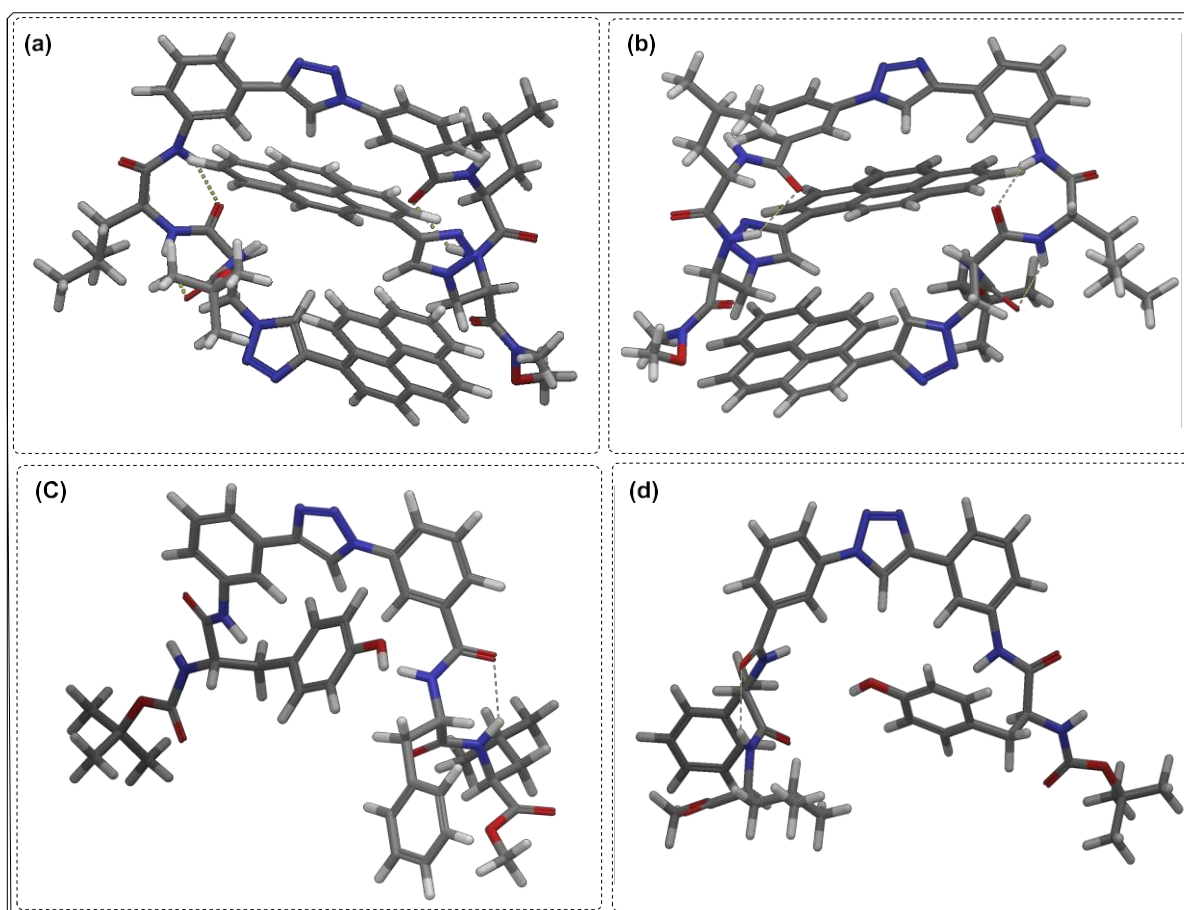

**Figure S20.** OPLS 2005 force field energy minimized conformations (a) front side view, (b) back side view of Pentapeptide **2** (**BocNH**-<sup>TPy</sup>**Ala**<sup>D<sub>0</sub></sup>-**Leu**-<sup>Ar</sup>**TAA**-**Leu**-<sup>TPy</sup>**Ala**<sup>D<sub>0</sub></sup>-**CONMe(OMe)**), and (c) front side view, (d) back side view of Tetrapeptide **3** (**BocNH**-**Tyr**-<sup>Ar</sup>**TAA**-**Phe**-**Leu**-**CO<sub>2</sub>Me**) in water.

Next, we carried out conformational search using OPLS 2005 force field at constant dielectric in water with “large scale low-frequency-mode conformational search” (Mixed torsional/Large scale low-mode sampling = MCMM/LMCS) method using Schrodinger MacroModel (Maestro vs. 9.0) software package. It is a hybrid functional method wherein Low-Mode Conformational Search Methods is hybridized with Monte Carlo Multiple Minimum (MCMM) global searching. This method uses a combination of the random changes in torsion angles and/or molecular position from the MCMM method, together with the low-mode steps from the LLMOD method used in Large scale low-mode.

A total of 500 structures were processed with 500 maximum no. of steps iteration. A global search analysis eliminates redundant conformers using RMS deviation for all compared atoms exceed the threshold Cutoff of 0.5 Å. An optimal minimization method was chosen for minimizing the generating conformers.



A total of 65 (for Pentapeptide **2**) and 116 (for tetrapeptide **3**) minimized and well converged conformers were generated out of which the one conformer appeared 3 times (for Pentapeptide **2**), and 5 times (for tetrapeptide **3**) which remained within 1.00 kcal/mole (4.18 kJ/mole) global minimum with a convergence threshold of 0.047 to 0.045 RMSD (threshold cutoff = 0.05). These conformers were taken as the starting structures for MD simulation studies.

## 5.2. Molecular Dynamics Simulation of Optimized Structure of the Peptides **2** and **3**.

The MD simulations were done by Schrodinger Macromodel (Maestro vs. 9.1) software package with OPLS 2005 force field in which the systems were subjected to 100 ps simulation time (with time step of 1.5 fs and equilibrium time 1.0 ps) at constant temperature (300 K) and pressure (1 atm) with shaking all bonds. An optimal minimization method was chosen for minimizing the generated structures (with maximum iteration of 1000) with gradient convergence threshold of 0.05.

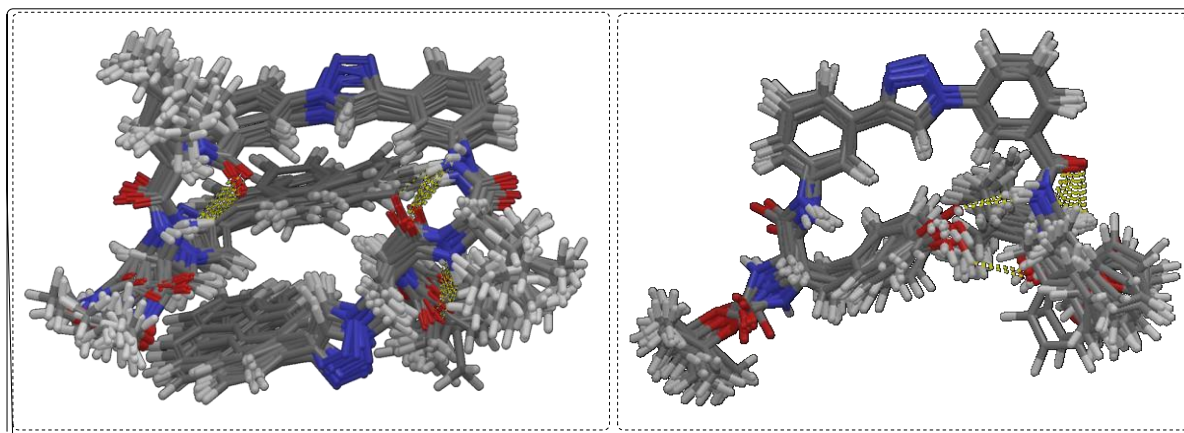

**Figure S21.** Well Converged structures (within 21 kJ/mole global minima) obtained from molecular dynamics simulation for the peptides (a) Pentapeptide **2** ( $\text{BocNH}^{\text{TPyAla}^{\text{Do}}}\text{-Leu-}^{\text{ArTAA-Leu-TPyAla}^{\text{Do}}}\text{-CONMe(OMe)}$ ), (b) Tetrapeptide **3** ( $\text{BocNH-Tyr-}^{\text{ArTAA-Phe-Leu-CO}_2\text{Me}}$ ).

## 6. Study of Photophysical Property



## 6.1. UV-visible & fluorescence measurements method

All the UV –visible spectra of the peptides (10  $\mu$ M) were measured in different solvents using a UV-Visible spectrophotometer using cell of 1 cm path length at 25  $^{\circ}$ C. All the sample solutions were prepared before an hour for the experiment.

All the sample solutions with same concentration as described in UV measurement experiments for fluorescence study. Emission spectra were obtained using a fluorescence spectrophotometer at 25  $^{\circ}$ C using 1 cm path length cell. The excitation wavelengths for the monomers were set at  $\lambda_{\text{max}}^{\text{abs}}$ . Time resolved fluorescence decays were measured using time resolved fluorescence spectrophotometer. The fluorescence quantum yields ( $\Phi_f$ ) were determined using quinine sulphate as a reference with the known  $\Phi_f = 0.54$  in 0.1 molar solution in sulphuric acid.

## 6.2. UV-visible and Fluorescence Spectra

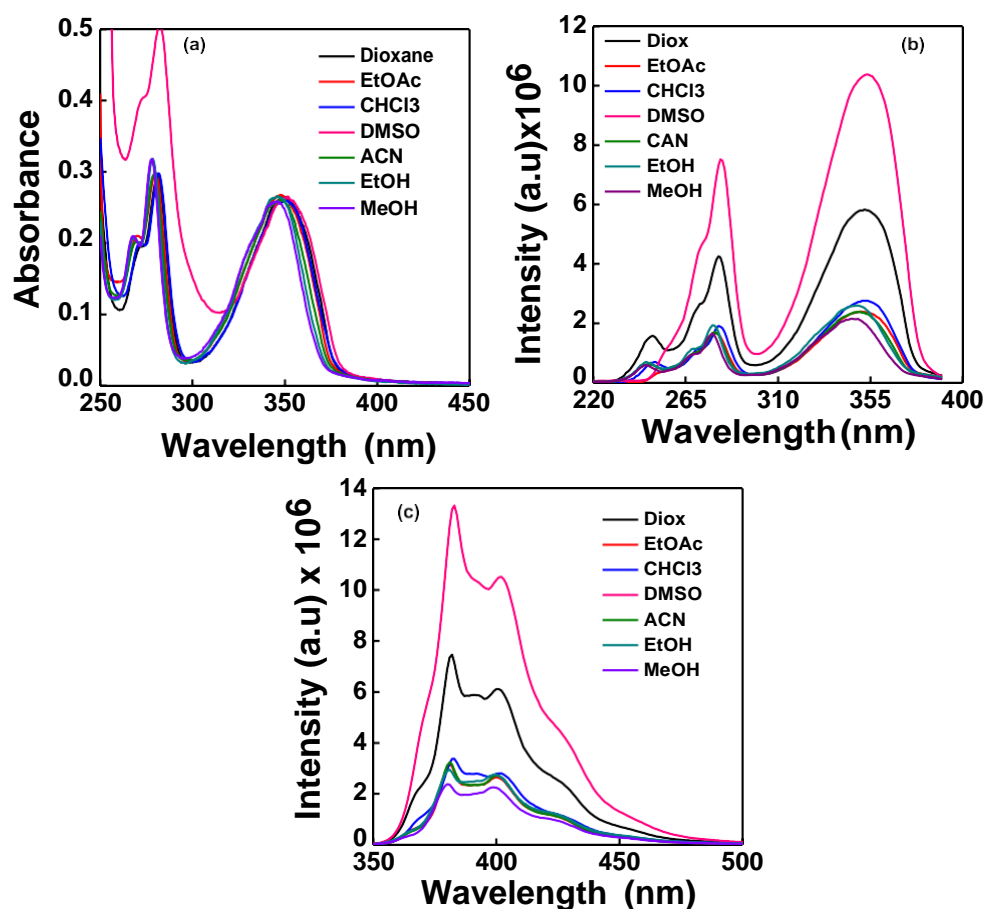

**Figure S22.** UV-Visible (a), Excitation spectra (b), Fluorescence spectra (c) of **Dipeptide 16** in different solvents (10  $\mu$ M, r.t.;  $\lambda_{\text{ex}} = \lambda_{\text{max}}$  (345 nm) of each solvent).

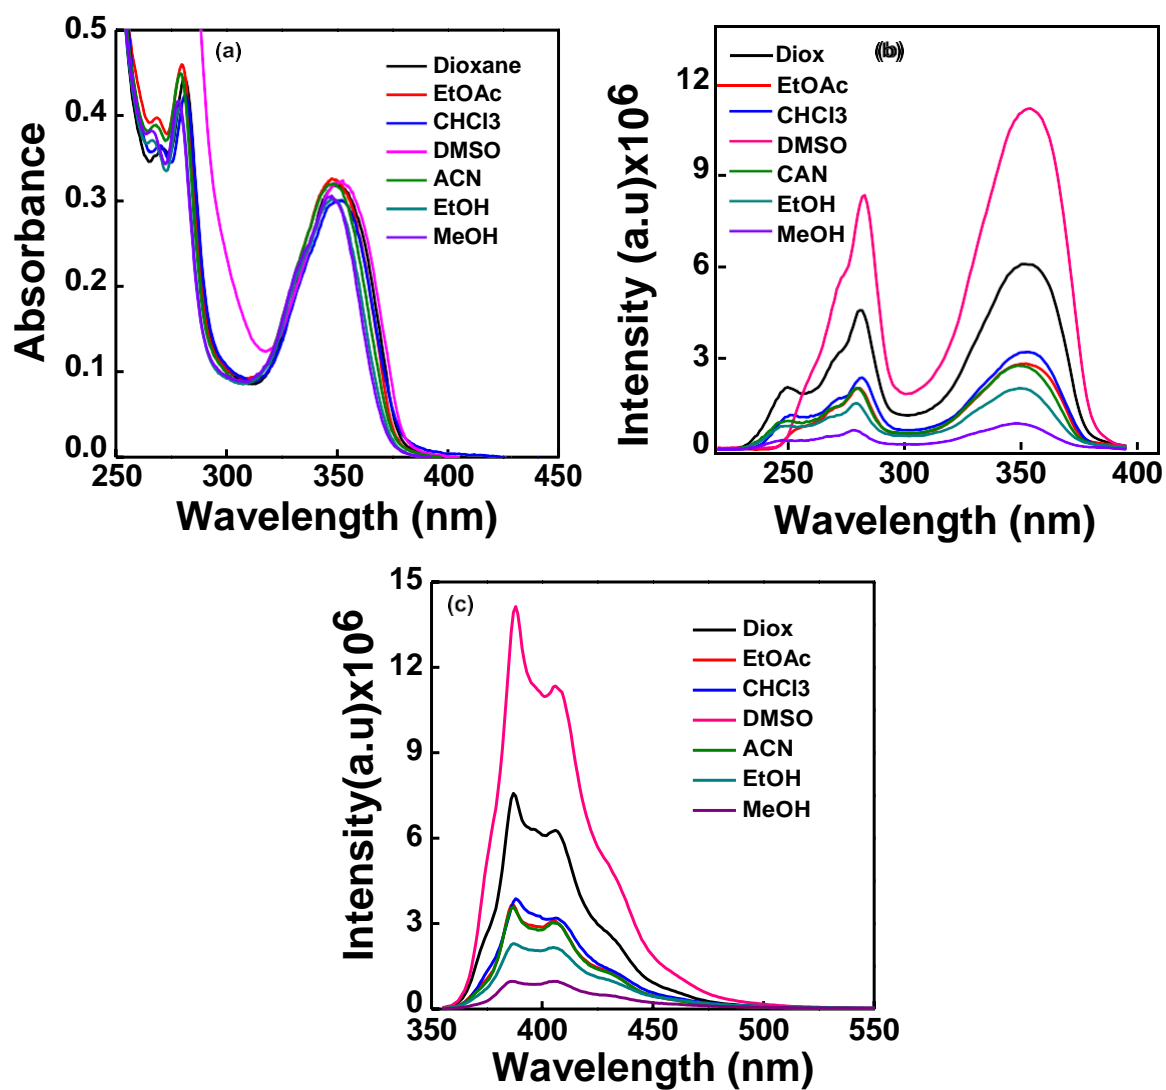

**Figure S23.** UV-Visible (a), Excitation spectra (b), Fluorescence spectra (c) of **Tripeptide 18** in different solvents (10  $\mu$ M, r.t.;  $\lambda_{\text{ex}} = \lambda_{\text{max}}$  (345 nm) of each solvent).

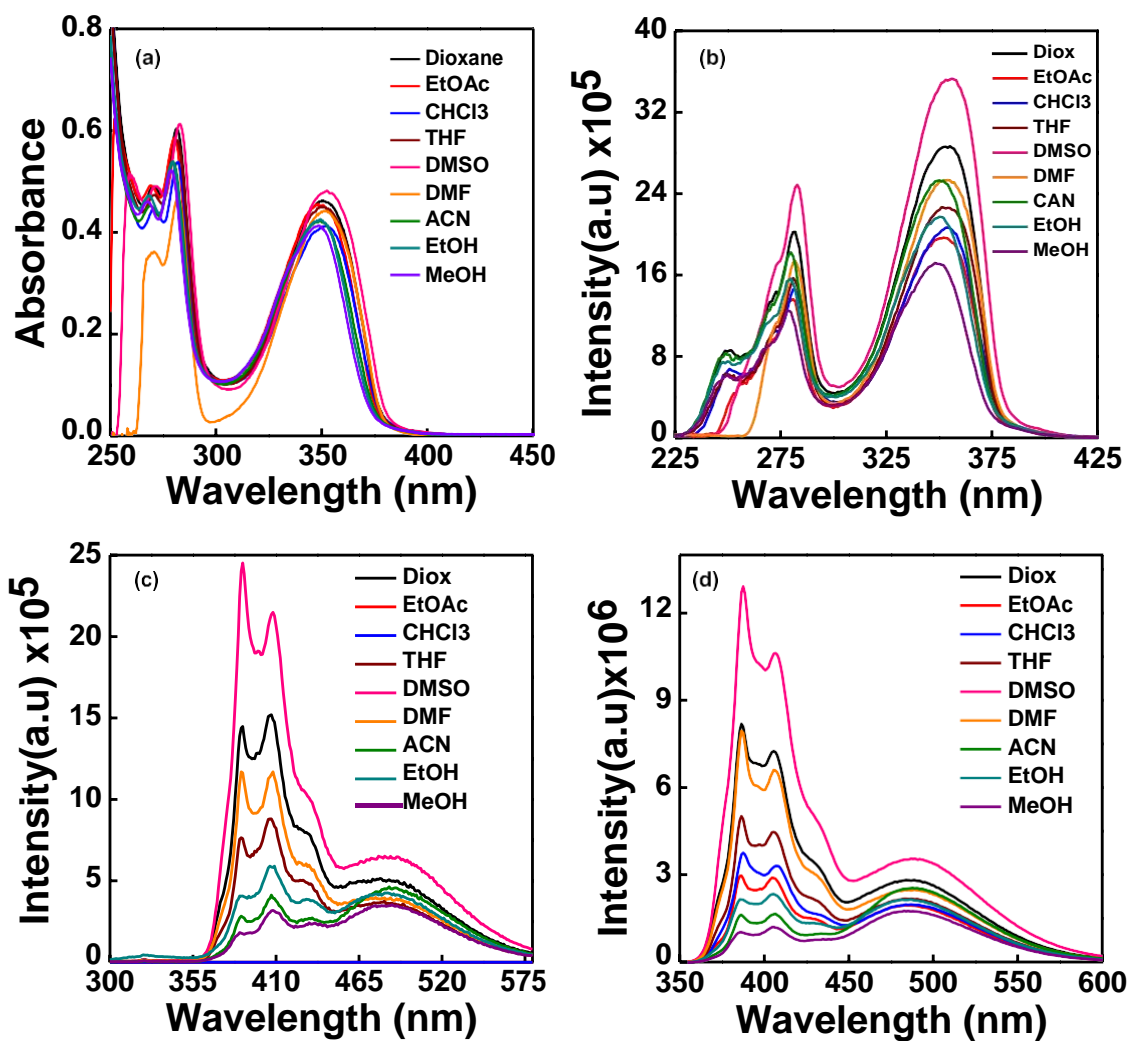

**Figure S24.** UV-Visible (a), Excitation spectra (b), Fluorescence spectra of **Pentapeptide 2** in different solvents (c)  $\lambda_{\text{ex}} = 290$  nm, (d)  $\lambda_{\text{ex}} = 345$  nm (10  $\mu\text{M}$ , r.t.; of each solvent).

### 6.3. Photophysical Properties Summary of synthesized peptides 16, 18 & 2

**Table S4:** Summary table of photophysical properties of the **Dipep. 16**

| Entry                                                   | Solvents          | $\Delta f$ | UV-Vis & Fluorescence         |                           |          |
|---------------------------------------------------------|-------------------|------------|-------------------------------|---------------------------|----------|
|                                                         |                   |            | $\lambda_{max}^{abs}$<br>(nm) | $\lambda_{max}^f$<br>(nm) | $\Phi_f$ |
| <b>Leu<sup>TPy</sup>Ala<sup>Do</sup>-<br/>Dipep. 16</b> | Dioxane           | 0.021      | 281, 349                      | 382, 400, 423             | 0.326    |
|                                                         | CHCl <sub>3</sub> | 0.148      | 281, 350                      | 382, 401, 422             | 0.158    |
|                                                         | EtOAc             | 0.201      | 279, 347                      | 381, 499, 421             | 0.133    |
|                                                         | DMSO              | 0.265      | 282, 350                      | 383, 402, 425             | 0.56     |
|                                                         | EtOH              | 0.290      | 278, 345                      | 380, 400, 421             | 0.140    |
|                                                         | ACN               | 0.307      | 279, 345                      | 380, 400, 422             | 0.137    |
|                                                         | MeOH              | 0.309      | 278, 344                      | 380, 399, 418             | 0.110    |

**Table S5:** Summary table of photophysical properties of the **Tripep. 18**

| Entry                                                                           | Solvents          | $\Delta f$ | UV-Vis & Fluorescence         |                           |          |
|---------------------------------------------------------------------------------|-------------------|------------|-------------------------------|---------------------------|----------|
|                                                                                 |                   |            | $\lambda_{max}^{abs}$<br>(nm) | $\lambda_{max}^f$<br>(nm) | $\Phi_f$ |
| <b>Ar<sup>TAA</sup><br/>_leu<sup>TPy</sup>Ala<sup>Do</sup>-<br/>_Tripep. 18</b> | Dioxane           | 0.021      | 281, 349                      | 387, 406, 429             | 0.303    |
|                                                                                 | CHCl <sub>3</sub> | 0.148      | 281, 351                      | 387, 406, 430             | 0.173    |
|                                                                                 | EtOAc             | 0.201      | 280, 348                      | 386, 406, 426             | 0.139    |
|                                                                                 | DMSO              | 0.265      | 280, 350                      | 387, 406, 428             | 0.57     |
|                                                                                 | EtOH              | 0.290      | 279, 348                      | 387, 405, 427             | 0.114    |
|                                                                                 | ACN               | 0.307      | 279, 347                      | 386, 406, 428             | 0.138    |
|                                                                                 | MeOH              | 0.309      | 278, 346                      | 386, 407, 430             | 0.051    |

**Table S6:** Summary table of photophysical properties of the **Pentapep. 2**

| Entry                                                                                                                                                    | Solvents          | $\Delta f$ | UV-Vis & Fluorescence         |                           |          |
|----------------------------------------------------------------------------------------------------------------------------------------------------------|-------------------|------------|-------------------------------|---------------------------|----------|
|                                                                                                                                                          |                   |            | $\lambda_{max}^{abs}$<br>(nm) | $\lambda_{max}^f$<br>(nm) | $\Phi_f$ |
| $\begin{matrix} \text{TPy} \text{Ala}^{\text{Do}} \\ \text{leu} \text{ArTAA} \\ \text{leu} \text{TPyAla}^{\text{Do}} \\ \text{Pentapep. 2} \end{matrix}$ | Dioxane           | 0.021      | 281, 351                      | 387, 406, 426, 488        | 0.358    |
|                                                                                                                                                          | CHCl <sub>3</sub> | 0.148      | 281, 351                      | 388, 407, 428, 486        | 0.225    |
|                                                                                                                                                          | EtOAc             | 0.201      | 280, 349                      | 388, 407, 428, 485        | 0.183    |
|                                                                                                                                                          | THF               | 0.210      |                               |                           | 0.246    |
|                                                                                                                                                          | DMSO              | 0.265      | 282, 352                      | 387, 406, 428, 488        | 0.498    |
|                                                                                                                                                          | DMF               | 0.275      |                               |                           | 0.338    |
|                                                                                                                                                          | EtOH              | 0.290      | 279, 349                      | 324, 386, 406, 426, 485   | 0.192    |
|                                                                                                                                                          | ACN               | 0.307      | 279, 349                      | 386, 406, 487             | 0.191    |
|                                                                                                                                                          | MeOH              | 0.309      | 278, 348                      | 385, 406, 485             | 0.140    |

#### 6.4. Study of Fluorescence Resonance Energy Transfer (FRET) in Pentapeptide 2.

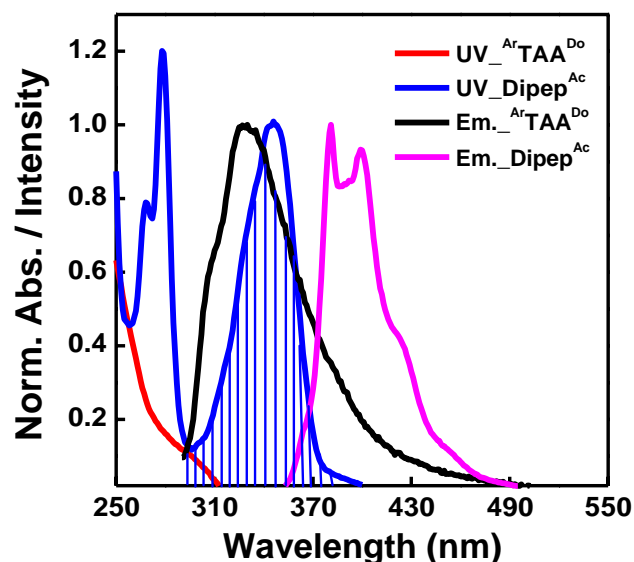

**Figure S25.** (a) Overlapping of emission spectra of **triazolyl aromatic scaffold** **ArTAA, 1** (act as a FRET donor) and the absorption spectra of **Dipeptide containing fluorescent amino acid** **TPyAla<sup>Do</sup>, 16** (act as a FRET acceptor) (10  $\mu\text{M}$  each, r.t.;  $\lambda_{ex}$  = 290 nm in EtOH).

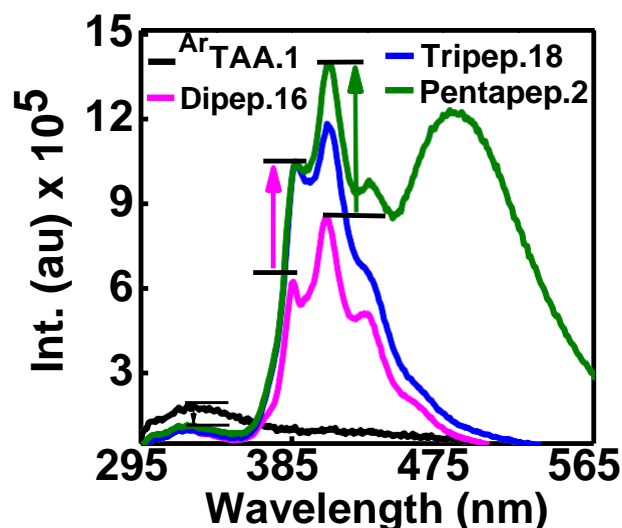

**Figure S26.** Fluorescence spectra of individual donor (<sup>Ar</sup>TAA, **1**) and acceptor amino acid **dipeptide 16** and the **Pentapeptide 2** which contain these two moieties. In **Pentapeptide 2**, acceptor emission increased by almost 1.8 times in presence of donor, whereas the donor emission decreases almost 1.6 times of the individual donor emission. This change in fluorescence intensity is visual evidence of FRET (10  $\mu$ M each, r.t.;  $\lambda_{ex}$  = 290 nm in EtOH).

#### Calculation of the Forster distance and FRET efficiency

The fluorescence resonance energy transfer (FRET) and the Förster distance for the FRET were calculated using the following three equations. The efficiency of energy transfer,  $E$ , was calculated using the equation (1)

$$E = \frac{R_0^6}{R_0^6 + r^6} = 1 - \frac{F}{F_0} \dots\dots\dots(1)$$

where  $F$  and  $F_0$  are the fluorescence intensity of donor in the presence and absence of acceptor,  $r$  is the distance between donor and the acceptor and  $R_0$  is the critical distance when the energy transfer efficiency is 50% . The Förster distance  $R_0$  (Å) was calculated by the following equation (2)

$$R_0 = [8.79 \times 10^{-5} \kappa^2 n^{-4} \Phi_D J(\lambda)]^{1/6} \dots\dots\dots(2)$$

where  $\kappa^2$  is the orientation,  $n$  is the refractive index of the medium,  $\Phi_D$  is the quantum yield of the donor in the absence of acceptor  $J(\lambda)$  is the overlap integral of the fluorescence emission spectrum of the donor and the absorption spectrum of the acceptor given by the following equation (3)

$$J = \frac{\int_0^\infty F_D(\lambda) \epsilon(\lambda) \lambda^4 d\lambda}{\int_0^\infty F_D(\lambda) d\lambda} \dots\dots\dots(3)$$

where  $F_D(\lambda)$  is the fluorescence intensity of the donor in the wavelength range  $\lambda$  to  $\lambda + \Delta\lambda$  with the total intensity normalized to unity.  $\varepsilon_A(\lambda)$  is the molar extinction coefficient of the acceptor as a function of wavelength ( $\lambda$ ).

Using the values of  $\kappa^2 = 2/3$ ,  $n = 1.36$ ,  $\Phi_D = 0.068$ , and the obtained overlap integral,  $J(\lambda) = 5.9255 \times 10^{16}$

the  $R_0$  and  $r$  values were calculated which were found to be  $R_0 = 58 \text{ \AA}$  and  $r = 63 \text{ \AA}$ .  $R_0$  is the critical distance when the energy transfer efficiency is 50 % and  $r$  is the distance between the donor and acceptor.

Energy Transfer efficiency (E) =  $1 - F/F_0 = 38 \%$ .  $F$  and  $F_0$  are the fluorescence intensity of donor in the presence and absence of acceptor.

### Picture of Di, Tri and Pentapeptide under Fluorescence light

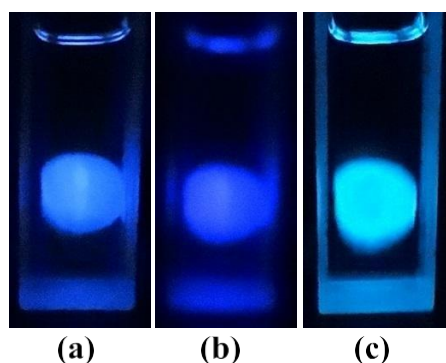

**Figure S27.** Picture under fluorescence light ( $\lambda_{\text{ex}} = 280 \text{ nm}$ ) of (a) Dipeptide **16**, (b) Tripeptide **18** and (c) Pentapeptide **2** in ethanol solvents.

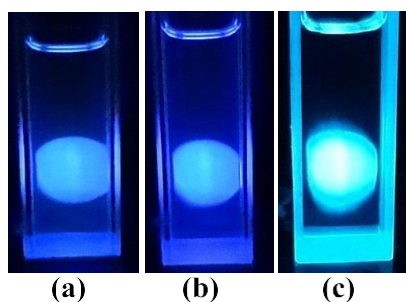

**Figure S28.** Picture under fluorescence light ( $\lambda_{\text{ex}} = 350 \text{ nm}$ ) of (a) Dipeptide **16**, (b) Tripeptide **18** and (c) Pentapeptide **2** in ethanol solvents.

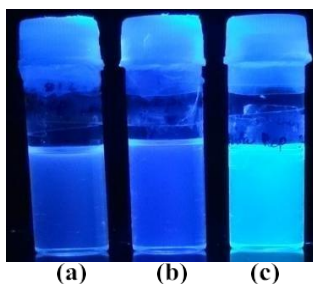

**Figure S29.** Picture under transilluminator ( $\lambda_{\text{ex}} = 365 \text{ nm}$ ) of (a) Dipeptide **16**, (b) Tripeptide **18** and (c) Pentapeptide **2** in ethanol solvent.

## 6.5. Life time table and Trace

**Table S7:** Summary table of fluorescence lifetimes of the peptides **1**, **18** & **2** at  $\lambda_{\text{ex}} = 290 \text{ nm}$

| Entry                                                                                                                                                                                                                                                                                                                                                                                                           | Solvents       | $\Phi_f$ | $\lambda$<br>[nm] | $\tau_1$ [ns]  | $\tau_2$ [ns] | $\langle \tau \rangle$<br>[ns] | $k_f$<br>[ $10^8 \text{ s}^{-1}$ ] | $k_{nr}$<br>[ $10^8 \text{ s}^{-1}$ ] | $\chi^2$ |
|-----------------------------------------------------------------------------------------------------------------------------------------------------------------------------------------------------------------------------------------------------------------------------------------------------------------------------------------------------------------------------------------------------------------|----------------|----------|-------------------|----------------|---------------|--------------------------------|------------------------------------|---------------------------------------|----------|
| <b>ArTAA. 1</b>                                                                                                                                                                                                                                                                                                                                                                                                 | <b>Dioxane</b> | 0.0043   | 330               | 4.22<br>(100%) | -----         | 4.22                           | 0.01                               | 2.36                                  | 0.93     |
|                                                                                                                                                                                                                                                                                                                                                                                                                 | <b>EtOH</b>    | 0.07     | 330               | 3.65<br>(49%)  | 8.85<br>(51%) | 6.21                           | 0.112                              | 1.5                                   | 1.03     |
|                                                                                                                                                                                                                                                                                                                                                                                                                 | <b>ACN</b>     | 0.005    | 320               | 1.8<br>(100%)  | -----         | 1.8                            | 0.027                              | 5.53                                  | 0.85     |
|                                                                                                                                                                                                                                                                                                                                                                                                                 | <b>MeOH</b>    | 0.004    | 330               | 3.48<br>(100%) | -----         | 3.48                           | 0.011                              | 2.86                                  | 0.92     |
| <b>ArTAA<sub>leu</sub><sup>TPyAl</sup><br/>a<sup>Do</sup><sub>Tripep. 18</sub></b>                                                                                                                                                                                                                                                                                                                              | <b>Dioxane</b> | 0.0015   | 330               | 2.68<br>(100%) | -----         | 2.68                           | 0.005                              | 3.73                                  | 0.87     |
|                                                                                                                                                                                                                                                                                                                                                                                                                 | <b>EtOH</b>    | 0.005    | 330               | 2.15<br>(14%)  | 6.7<br>(86%)  | 6.07                           | 0.008                              | 1.64                                  | 1.03     |
|                                                                                                                                                                                                                                                                                                                                                                                                                 | <b>ACN</b>     | 0.001    | 320               | 1.21<br>(100%) | -----         | 1.21                           | 0.008                              | 8.26                                  | 0.81     |
|                                                                                                                                                                                                                                                                                                                                                                                                                 | <b>MeOH</b>    | 0.0011   | 330               | 3.36<br>(100%) | -----         | 3.36                           | 0.003                              | 2.97                                  | 0.92     |
| <b>TPyAla<sup>Do</sup><sub>leu</sub><sup>ArT</sup><br/>AA<sub>leu</sub><sup>TPyAla</sup><br/>Pentapep. 2</b>                                                                                                                                                                                                                                                                                                    | <b>Dioxane</b> | 0.001    | 330               | 3.83<br>(100%) | -----         | 3.83                           | 0.002                              | 2.61                                  | 0.90     |
|                                                                                                                                                                                                                                                                                                                                                                                                                 | <b>EtOH</b>    | 0.004    | 330               | 2.05<br>(15%)  | 6.38<br>(85%) | 5.69                           | 0.007                              | 1.75                                  | 0.98     |
|                                                                                                                                                                                                                                                                                                                                                                                                                 | <b>ACN</b>     | 0.0006   | 320               | 1.8<br>(100%)  | -----         | 1.8                            | 0.003                              | 5.51                                  | 0.88     |
|                                                                                                                                                                                                                                                                                                                                                                                                                 | <b>MeOH</b>    | 0.0007   | 330               | 3.23<br>(100%) | -----         | 3.23                           | 0.002                              | 3.09                                  | 0.92     |
| For lifetimes of the fluorescent amino acids $\lambda_{\text{ex}} = 290 \text{ nm}$ ; Concentration of each fluorescent amino acid = $10 \mu\text{M}$ ; $\langle \tau \rangle$ , $k_f$ , and $k_{nr}$ are weighted means from the biexponential fits: $\langle \tau \rangle = 1/(\alpha_1/\tau_1 + \alpha_2/\tau_2)$ , $k_f = \Phi_f/\langle \tau \rangle$ , and $k_{nr} = (1 - \Phi_f)/\langle \tau \rangle$ . |                |          |                   |                |               |                                |                                    |                                       |          |



**Table S8:** Summary table of fluorescence lifetimes of the peptides **16, 18 & 2** at  $\lambda_{\text{ex}} = 290$  nm

| Entry                                                                                                                                                                                                                                                                                                                                                                                          | Solvents       | $\Phi_f$ | $\lambda_{\text{em}}$<br>[nm] | $\tau_1$ [ns]   | $\tau_2$ [ns]  | $\langle\tau\rangle$<br>[ns] | $k_f$<br>[ $10^8 \text{ s}^{-1}$ ] | $k_{nr}$<br>[ $10^8 \text{ s}^{-1}$ ] | $\chi^2$ |
|------------------------------------------------------------------------------------------------------------------------------------------------------------------------------------------------------------------------------------------------------------------------------------------------------------------------------------------------------------------------------------------------|----------------|----------|-------------------------------|-----------------|----------------|------------------------------|------------------------------------|---------------------------------------|----------|
| <b>Leu<sup>TPy</sup>Ala<sup>Do</sup></b><br><b>Dipep. 16</b>                                                                                                                                                                                                                                                                                                                                   | <b>Dioxane</b> | 0.242    | 405                           | 33.05<br>(100%) | ----           | 33.05                        | 0.073                              | 0.229                                 | 1.02     |
|                                                                                                                                                                                                                                                                                                                                                                                                | <b>EtOH</b>    | 0.152    | 405                           | 20.83<br>(100%) | ----           | 20.83                        | 0.072                              | 0.407                                 | 0.99     |
|                                                                                                                                                                                                                                                                                                                                                                                                | <b>ACN</b>     | 0.126    | 405                           | 15.78<br>(100%) | ----           | 15.78                        | 0.079                              | 0.554                                 | 0.97     |
|                                                                                                                                                                                                                                                                                                                                                                                                | <b>MeOH</b>    | 0.113    | 405                           | 17.40<br>(100%) | ----           | 17.40                        | 0.065                              | 0.51                                  | 0.95     |
| <b>Ar<sup>TAA</sup>leu<sup>TPy</sup>Ala<sup>Do</sup></b><br><b>Tripep. 24</b>                                                                                                                                                                                                                                                                                                                  | <b>Dioxane</b> | 0.197    | 405                           | 33.25<br>(100%) | ----           | 33.25                        | 0.058                              | 0.389                                 | 1.03     |
|                                                                                                                                                                                                                                                                                                                                                                                                | <b>EtOH</b>    | 0.116    | 405                           | 14.01<br>(100%) | ----           | 14.01                        | 0.046                              | 0.748                                 | 0.92     |
|                                                                                                                                                                                                                                                                                                                                                                                                | <b>ACN</b>     | 0.108    | 405                           | 16.53<br>(100%) | ----           | 16.53                        | 0.047                              | 1.30                                  | 0.98     |
|                                                                                                                                                                                                                                                                                                                                                                                                | <b>MeOH</b>    | 0.055    | 405                           | 7.1<br>(100%)   | ----           | 7.1                          | 0.037                              | 1.22                                  | 1.01     |
| <b>TPyAla<sup>Do</sup>leu<sup>Ar</sup></b><br><b>TAA</b><br><b>leu<sup>TPy</sup>Ala<sup>Do</sup></b><br><b>Pentapep. 2</b>                                                                                                                                                                                                                                                                     | <b>Dioxane</b> | 0.130    | 405                           | 4.8<br>(5%)     | 23.3<br>(95%)  | 22.34                        | 0.058                              | 0.038                                 | 0.94     |
|                                                                                                                                                                                                                                                                                                                                                                                                | <b>EtOH</b>    | 0.059    | 405                           | 4.69<br>(18%)   | 14.34<br>(82%) | 12.58                        | 0.046                              | 0.074                                 | 0.91     |
|                                                                                                                                                                                                                                                                                                                                                                                                | <b>ACN</b>     | 0.035    | 405                           | 4.34<br>(50%)   | 10.65<br>(50%) | 7.42                         | 0.047                              | 1.30                                  | 0.85     |
|                                                                                                                                                                                                                                                                                                                                                                                                | <b>MeOH</b>    | 0.03     | 405                           | 3.7<br>(39%)    | 10.7<br>(61%)  | 7.95                         | 0.037                              | 1.22                                  | 0.91     |
| <b>TPyAla<sup>Do</sup>leu<sup>Ar</sup></b><br><b>TAA</b><br><b>leu<sup>TPy</sup>Ala<sup>Do</sup></b><br><b>Pentapep. 2</b>                                                                                                                                                                                                                                                                     | <b>Dioxane</b> | 0.147    | 485                           | 24.53<br>(35%)  | 32.77<br>(65%) | 42.64                        | 0.034                              | 0.20                                  | 1.05     |
|                                                                                                                                                                                                                                                                                                                                                                                                | <b>EtOH</b>    | 0.119    | 485                           | 25.9<br>(100%)  | ----           | 25.9                         | 0.045                              | 0.340                                 | 1.05     |
|                                                                                                                                                                                                                                                                                                                                                                                                | <b>ACN</b>     | 0.115    | 485                           | 17.36<br>(100%) | ----           | 17.36                        | 0.066                              | 0.510                                 | 0.92     |
|                                                                                                                                                                                                                                                                                                                                                                                                | <b>MeOH</b>    | 0.095    | 485                           | 19.03<br>(100%) | ----           | 19.03                        | 0.049                              | 0.476                                 | 0.99     |
| For lifetimes of the fluorescent amino acids $\lambda_{\text{ex}} = 290$ nm; Concentration of each fluorescent amino acid = 10 $\mu\text{M}$ ; $\langle\tau\rangle$ , $k_f$ , and $k_{nr}$ are weighted means from the biexponential fits: $\langle\tau\rangle = 1/(\alpha_1/\tau_1 + \alpha_2/\tau_2)$ , $k_f = \Phi_f/\langle\tau\rangle$ , and $k_{nr} = (1 - \Phi_f)/\langle\tau\rangle$ . |                |          |                               |                 |                |                              |                                    |                                       |          |

**Table S9:** Summary table of fluorescence lifetimes of the peptides **16**, **18** & **2** at  $\lambda_{\text{ex}} = 336$  nm

| Entry                                                                                                                                                                                                                                                                                                                                                                                          | Solvents       | $\Phi_f$ | $\lambda$ [nm] | $\tau_1$ [ns] | $\tau_2$ [ns] | $\langle\tau\rangle$ [ns] | $k_f$ [ $10^8 \text{s}^{-1}$ ] | $k_{nr}$ [ $10^8 \text{s}^{-1}$ ] | $\chi^2$ |
|------------------------------------------------------------------------------------------------------------------------------------------------------------------------------------------------------------------------------------------------------------------------------------------------------------------------------------------------------------------------------------------------|----------------|----------|----------------|---------------|---------------|---------------------------|--------------------------------|-----------------------------------|----------|
| <b>Leu<sup>TPy</sup>Ala<sup>Do</sup> – Dipep. 16</b>                                                                                                                                                                                                                                                                                                                                           | <b>Dioxane</b> | 0.326    | 405            | 33.65 (100%)  | ----          | 33.65                     | 0.096                          | 0.200                             | 1.02     |
|                                                                                                                                                                                                                                                                                                                                                                                                | <b>EtOH</b>    | 0.140    | 405            | 21.39 (100%)  | ----          | 21.39                     | 0.065                          | 0.402                             | 1.03     |
|                                                                                                                                                                                                                                                                                                                                                                                                | <b>ACN</b>     | 0.137    | 405            | 15.89 (100%)  | ----          | 15.89                     | 0.086                          | 0.543                             | 0.92     |
|                                                                                                                                                                                                                                                                                                                                                                                                | <b>MeOH</b>    | 0.115    | 405            | 18.59 (100%)  | ----          | 18.59                     | 0.059                          | 0.479                             | 1.00     |
| <b>Ar<sup>TAA</sup>leu<sup>TPy</sup> – yAla<sup>Do</sup> – Tripep . 18</b>                                                                                                                                                                                                                                                                                                                     | <b>Dioxane</b> | 0.303    | 405            | 33.14 (100%)  | ----          | 33.14                     | 0.091                          | 0.210                             | 0.99     |
|                                                                                                                                                                                                                                                                                                                                                                                                | <b>EtOH</b>    | 0.114    | 405            | 14.39 (100%)  | ----          | 14.39                     | 0.079                          | 0.616                             | 0.96     |
|                                                                                                                                                                                                                                                                                                                                                                                                | <b>ACN</b>     | 0.138    | 405            | 16.51 (100%)  | ----          | 16.51                     | 0.083                          | 0.522                             | 0.97     |
|                                                                                                                                                                                                                                                                                                                                                                                                | <b>MeOH</b>    | 0.051    | 405            | 5.1 (50%)     | 10.45 (50%)   | 7.72                      | 0.066                          | 0.123                             | 0.95     |
| <b>TPyAla<sup>Do</sup> – leu<sup>Ar</sup>TAA – leu<sup>TPy</sup>Ala<sup>Do</sup> – Pentapep. 2</b>                                                                                                                                                                                                                                                                                             | <b>Dioxane</b> | 0.171    | 405            | 7.56 (6%)     | 23.68 (94%)   | 22.77                     | 0.075                          | 0.346                             | 0.99     |
|                                                                                                                                                                                                                                                                                                                                                                                                | <b>EtOH</b>    | 0.057    | 405            | 5.2 (20%)     | 14.28 (80%)   | 12.45                     | 0.045                          | 0.757                             | 0.93     |
|                                                                                                                                                                                                                                                                                                                                                                                                | <b>ACN</b>     | 0.038    | 405            | 4.22 (50%)    | 10.31 (50%)   | 7.32                      | 0.051                          | 0.131                             | 0.94     |
|                                                                                                                                                                                                                                                                                                                                                                                                | <b>MeOH</b>    | 0.03     | 405            | 4.44 (48%)    | 12.15 (52%)   | 8.38                      | 0.003                          | 0.116                             | 0.92     |
| <b>TPyAla<sup>Do</sup> – leu<sup>A</sup> – rTAA – leu<sup>TPy</sup>Ala<sup>Do</sup> – Pentapep. 2</b>                                                                                                                                                                                                                                                                                          | <b>Dioxane</b> | 0.192    | 485            | 23.45 (30%)   | 31.52 3(7%)   | 37.43                     | 0.051                          | 0.216                             | 1.05     |
|                                                                                                                                                                                                                                                                                                                                                                                                | <b>EtOH</b>    | 0.136    | 485            | 1.54 (4%)     | 23.19 (96%)   | 22.42                     | 0.060                          | 0.385                             | 1.01     |
|                                                                                                                                                                                                                                                                                                                                                                                                | <b>ACN</b>     | 0.150    | 485            | 16.82 (100%)  | ----          | 16.82                     | 0.089                          | 0.505                             | 0.96     |
|                                                                                                                                                                                                                                                                                                                                                                                                | <b>MeOH</b>    | 0.111    | 485            | 18.53 (100%)  | ----          | 18.53                     | 0.059                          | 0.48                              | 0.94     |
| For lifetimes of the fluorescent amino acids $\lambda_{\text{ex}} = 336$ nm; Concentration of each fluorescent amino acid = 10 $\mu\text{M}$ ; $\langle\tau\rangle$ , $k_f$ , and $k_{nr}$ are weighted means from the biexponential fits: $\langle\tau\rangle = 1/(\alpha_1/\tau_1 + \alpha_2/\tau_2)$ , $k_f = \Phi_f/\langle\tau\rangle$ , and $k_{nr} = (1 - \Phi_f)/\langle\tau\rangle$ . |                |          |                |               |               |                           |                                |                                   |          |

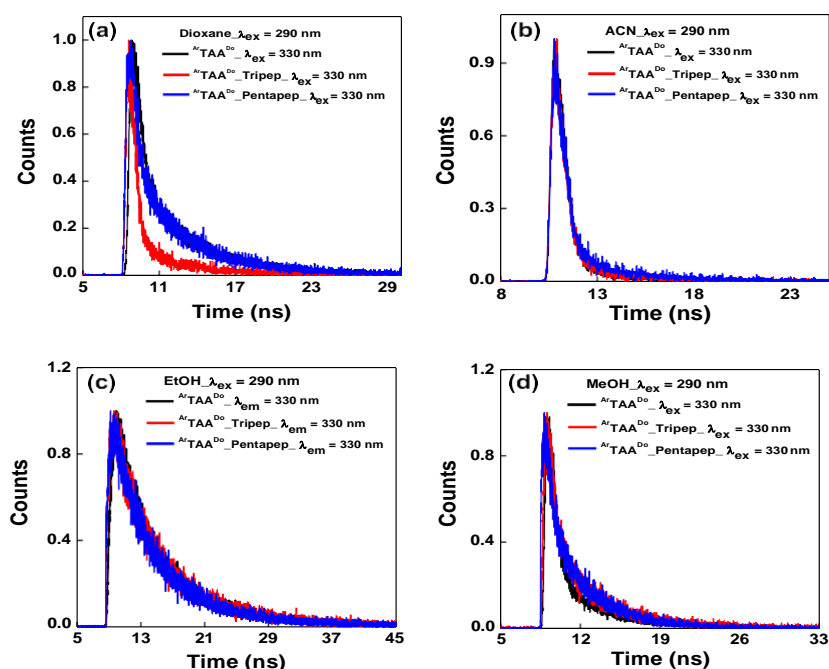

**Figure S30.** Time resolved fluorescence spectra of **ArTAA** , **Tripeptide 18** and **pentapeptide 2** using 290 LED in (a) Dioxane ( $\lambda_{ex} = 290$  nm,  $\lambda_{em} = 330$  nm); (b) ACN ( $\lambda_{ex} = 290$  nm,  $\lambda_{em} = 330$  nm); (c) ethanol ( $\lambda_{ex} = 290$  nm,  $\lambda_{em} = 330$  nm); (d) methanol ( $\lambda_{ex} = 290$  nm,  $\lambda_{em} = 330$  nm);

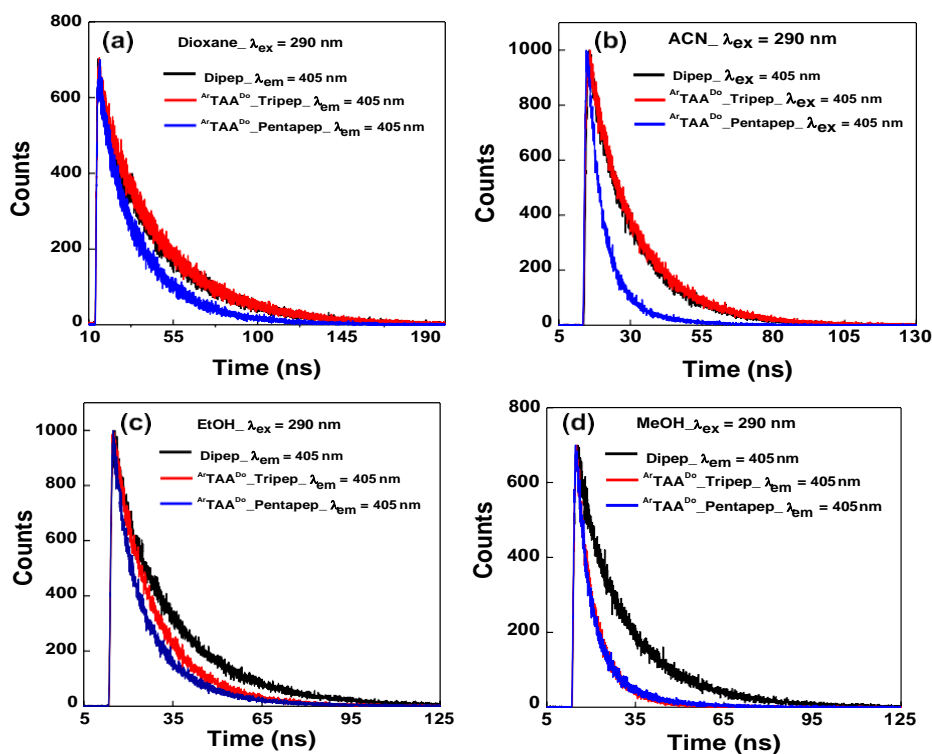

**Figure S31.** Time resolved fluorescence spectra of **Dipeptide 16** , **Tripeptide 18** and **pentapeptide 3** using 290 LED in (a) Dioxane ( $\lambda_{ex} = 290$  nm,  $\lambda_{em} = 405$  nm); (b) ACN ( $\lambda_{ex} = 290$  nm,  $\lambda_{em} = 405$  nm); (c) ethanol ( $\lambda_{ex} = 290$  nm,  $\lambda_{em} = 405$  nm); (d) methanol ( $\lambda_{ex} = 290$  nm,  $\lambda_{em} = 405$  nm).

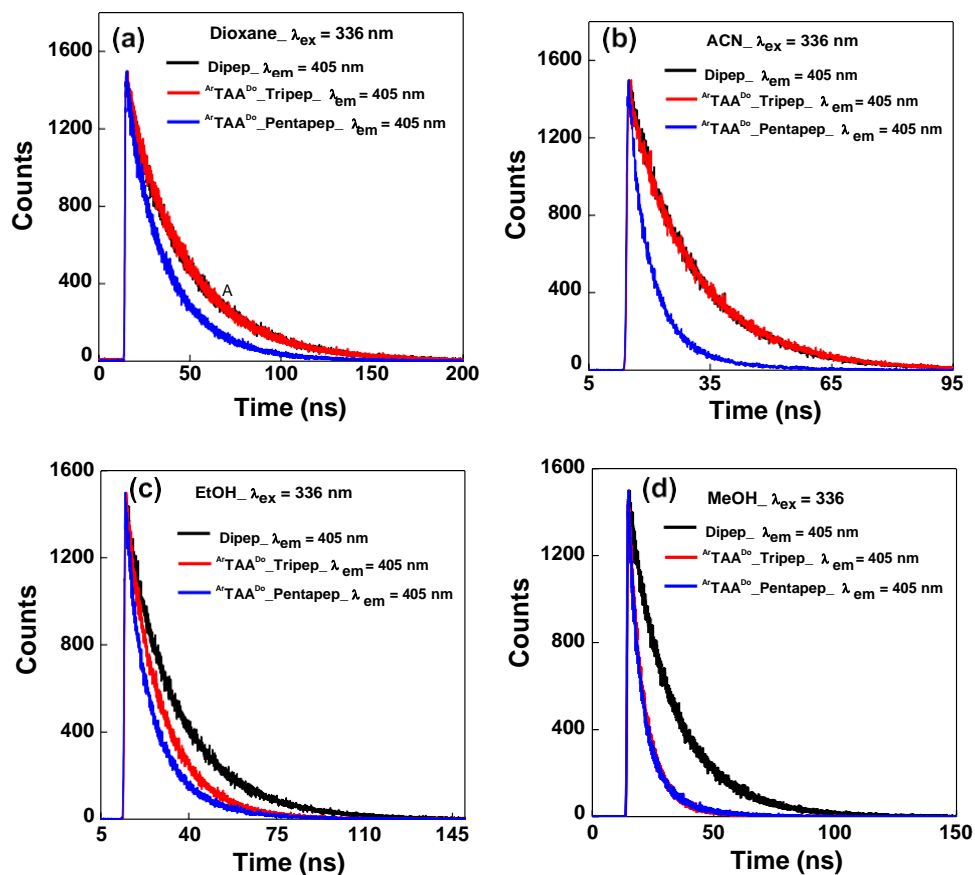

**Figure S32.** Time resolved fluorescence spectra of **Dipeptide 16** , **Tripeptide 18** and **pentapeptide 2** using 336 LED in (a) Dioxane ( $\lambda_{ex} = 336$  nm,  $\lambda_{em} = 405$  nm); (b) ACN ( $\lambda_{ex} = 336$  nm,  $\lambda_{em} = 405$  nm); (c) ethanol ( $\lambda_{ex} = 336$  nm,  $\lambda_{em} = 405$  nm); (d) methanol ( $\lambda_{ex} = 336$  nm,  $\lambda_{em} = 405$  nm).

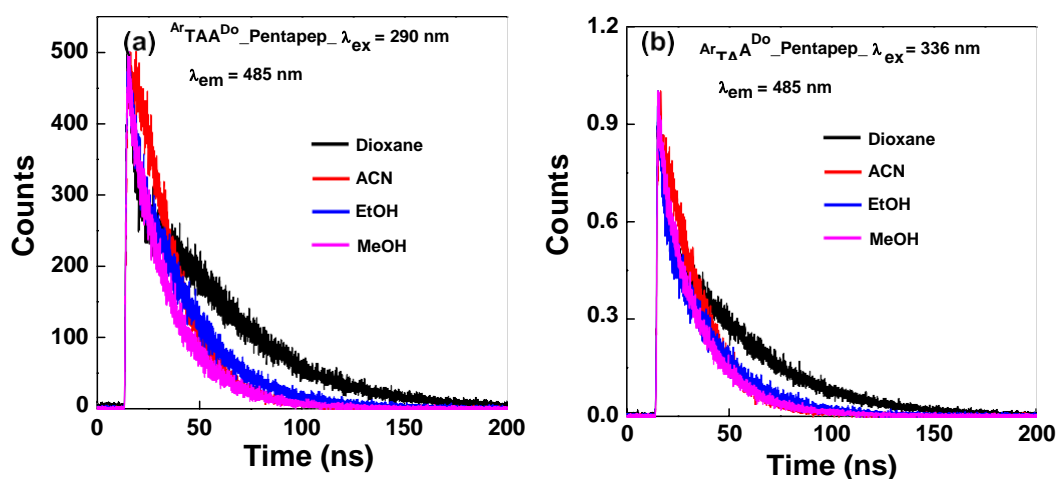

**Figure S33.** Time resolved fluorescence spectra of **Pentapeptide 2** using (a) 290 nm ( $\lambda_{ex} = 290$  nm,  $\lambda_{em} = 485$  nm); (b) 336 nm LED in different solvent ( $\lambda_{ex} = 336$  nm,  $\lambda_{em} = 485$  nm).

## **7. Studies on the interaction of Pentapeptide 2 with BSA**

### **7.1 General experimental**

#### **7.1.1 Materials**

BSA, Na<sub>2</sub>HPO<sub>4</sub> and NaH<sub>2</sub>PO<sub>4</sub>.H<sub>2</sub>O (for preparation of phosphate buffer) were purchased from Merck, India and used without further purification. Water was taken from a Milli-Q purification system. All solutions were prepared before 1 hour of experiments done. The probe molecules (Pentapeptide 2) was synthesized and purified according to the procedure described.

#### **7.1.2 Preparation of BSA Solution**

Phosphate buffer of pH 7.0 was used to prepare the solution of BSA (Merck). A 250  $\mu$ M of stock BSA solution was prepared by dissolving 0.0222 gm of BSA in 1.28 mL phosphate buffer (20 mM) of pH 7.0. From that stock solution sub stock of 1000  $\mu$ M BSA was prepared. The compound stock solution was prepared in DMF because of the poor solubility in water. 0.6 mg of Pentapeptide was dissolved in 1 mL DMF to make a stock probe solution of concentration 1092.4  $\mu$ M.

#### **7.1.3 General experimental on interaction study of BSA by photophysical study:**

All the spectral measurements were carried out at room temperature. To study the interaction of compound with BSA, an aqueous solution of peptide (4  $\mu$ M for peptide) was titrated with different concentrations of BSA (ranging from 0, 1, 2, 3, 4, 6, 8, 12, 16, 20, 24, 28  $\mu$ M ). The total volume of the final solution for each sample was 3 mL. The % of DMF content did not exceed 3%. The presence of 2% DMF does not induce structural changes to biomolecules. Each sample solution was mixed well before spectral measurements.

#### **7.1.4 UV-Visible Study**

The UV–Visible absorbance measurements were performed using Shimadzu UV- 2550 UV Visible spectrophotometer with a cell of 1 cm path length at 298 K. All the UV-Visible studies were carried out in 20 mM phosphate buffer of pH 7.02 containing solution at 298 K. 2 % DMF was used to solubilize the probe. The measurements were taken in absorbance mode and the absorbance values of the sample solutions were measured in the wavelength regime of 200– 700 nm. All the experiments were carried out with freshly prepared sample solutions.

#### **7.1.5 Fluorescence Study**

All fluorescence and steady state anisotropy experiments were performed using a Fluoromax 4 spectrophotometer with a cell of 1 cm path length at 298 K. The excitation wavelength for probe (Pentapeptide 2) was set at 280 nm, 350 nm and emission spectra were measured in the wavelength regime of 290–650 nm. Steady state anisotropy of the solutions was measured using Fluoromax 4 spectrophotometer. Time resolved fluorescence anisotropy decay were measured using Life Space-II (Edinburgh Instruments) time resolved fluorescence spectrophotometer. The fluorescence quantum yields ( $\Phi$ ) were determined using quinine sulphate as a reference with the known  $\Phi$  (0.54) in 0.1 molar solution in sulphuric acid.

7.2. Study of UV-visible and fluorescence photophysical properties of probe 2 (Pentapeptide) in presence BSA

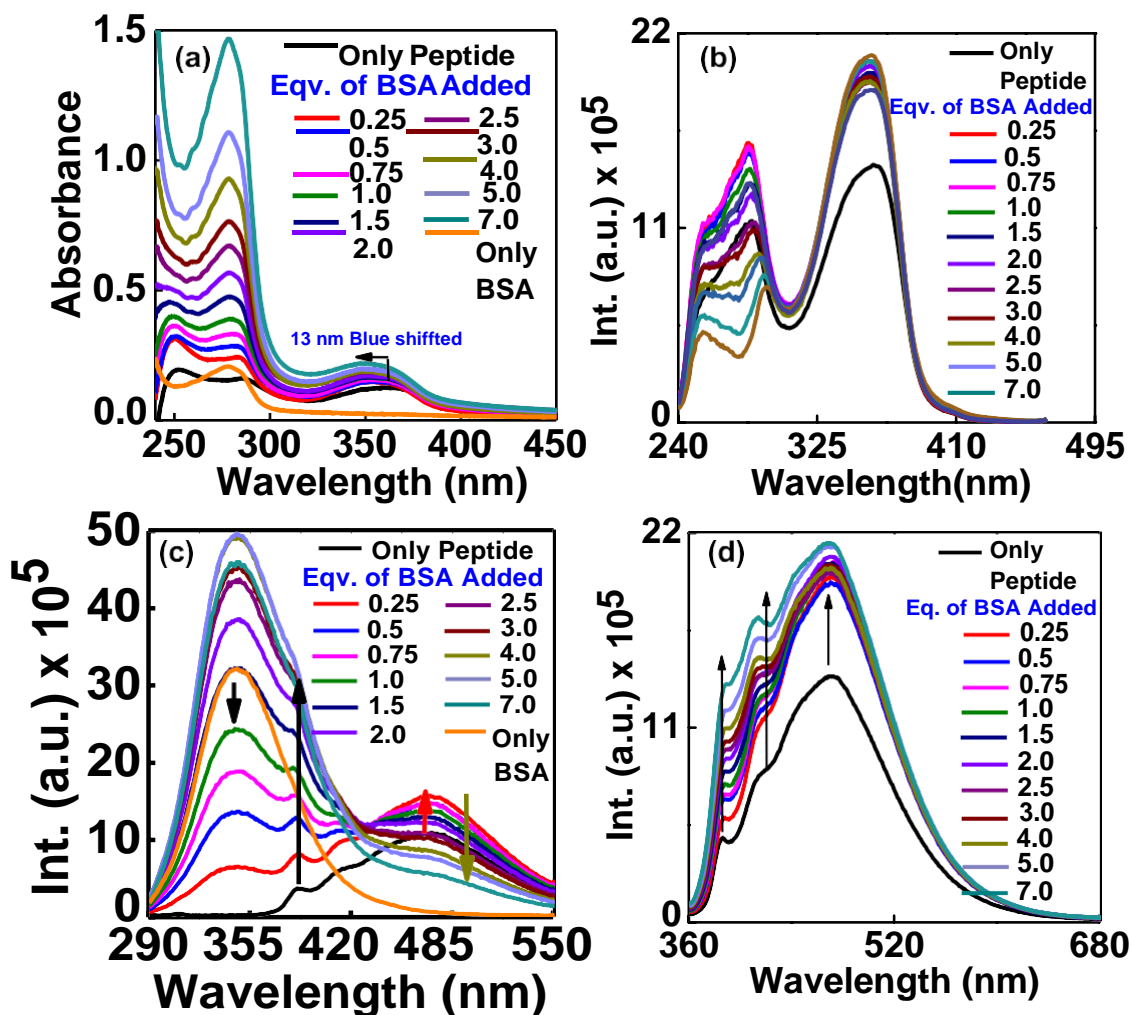

**Figure S34:** (a) UV-visible and (b) excitation spectra ( $\lambda_{ex} = 470$  nm), (c) emission spectra ( $\lambda_{ex} = 280$  nm) and (d) emission spectra ( $\lambda_{ex} = 350$  nm) of Pentapeptide 2 in presence of increasing BSA concentration at 298K. [Pentapeptide] = 4  $\mu$ M and [BSA] = 0, 1, 2, 3, 4, 6, 8, 12, 16, 20, 24, 28  $\mu$ M

**Table 10:** Summary table of photophysical properties of the peptide **2** in BSA

| Entry                       | Solvents           | UV-Vis & Fluorescence         |                           |          |
|-----------------------------|--------------------|-------------------------------|---------------------------|----------|
|                             |                    | $\lambda_{max}^{abs}$<br>(nm) | $\lambda_{max}^f$<br>(nm) | $\Phi_f$ |
| Only BSA                    | Buffer<br>(pH=7.0) | 278                           | 346                       | 0.058    |
| Only Penta peptide          | Buffer<br>(pH=7.0) | 251, 284,<br>364              | 385, 411, 472             | 0.073    |
| 1 eqv.Peptide +0.25 eqv.BSA | Buffer<br>(pH=7.0) | 283, 354                      | 342, 385, 414, 472        | 0.083    |
| 1 eqv.Peptide +0.50 eqv.BSA | Buffer<br>(pH=7.0) | 282, 353                      | 344, 384, 412, 471        | 0.083    |
| 1 eqv.Peptide +0.75 eqv.BSA | Buffer<br>(pH=7.0) | 280, 353                      | 345, 484, 411, 472        | 0.084    |
| 1 eqv.Peptide +1.00 eqv.BSA | Buffer<br>(pH=7.0) | 281, 352                      | 345, 383, 410, 473        | 0.078    |
| 1 eqv.Peptide +1.50 eqv.BSA | Buffer<br>(pH=7.0) | 280, 350                      | 346, 382, 410, 472        | 0.079    |
| 1 eqv.Peptide +2.0 eqv.BSA  | Buffer<br>(pH=7.0) | 279, 350                      | 346, 381, 409, 411        | 0.079    |

### 7.3. Benesi-Hildebrand plot to Evaluation Binding Constant

The association constant (K) of the fluorophore with BSA was determined by a Benesi-Hildebrand plot using the following equation 1,

$$\frac{1}{(I - I_0)} = \frac{1}{(I_\infty - I_0)} + \frac{1}{(I_\infty - I_0)K[BSA]} \quad \dots\dots\dots (1)$$

Where  $I_0$ ,  $I$  and  $I_\infty$  are the emission intensities of pentapeptide in the absence of BSA, in the presence of an intermediate and at infinite concentration of BSA respectively. From the slope of the  $1/(I - I_0)$  vs.  $1/[BSA]$  plot of equation 1, binding constant K was determined and its value is  $1.8 \times 10^5 \text{ M}^{-1}$ .  $\Delta G = -7.16 \text{ Kcal}$ .

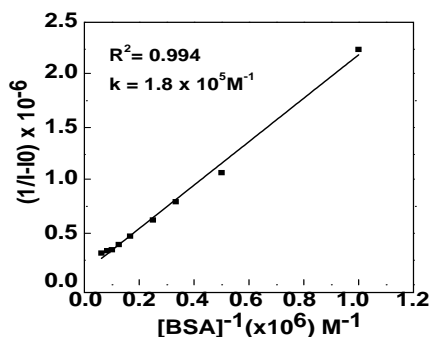

**Figure S35:** Benesi- Hildebrand plot of Pentapeptide **2** fluorophore in presence of increasing BSA concentration. . [pentapeptide] = 4  $\mu\text{M}$  and [BSA] = 0, 1, 2, 3, 4, 6, 8, 12, 16, 20, 24, 28  $\mu\text{M}$ .

### Isothermal titration calorimetry measurement

ITC titration of BSA with pentapeptide **2** was performed at 298 K in phosphate buffer pH 7.02. The protein solution (1  $\mu\text{M}$ ) was taken in a sample cell and titrant solution of pentapeptide **2** (15  $\mu\text{M}$ ) was fitted in the syringe. The resulting data was fitted with two site model. The binding constant ( $K$ ), binding stoichiometry ( $N$ ), enthalpy change ( $\Delta H$ ), entropy change ( $\Delta S$ ) and change in free energy were obtained from the fitted data (**Table 11**).

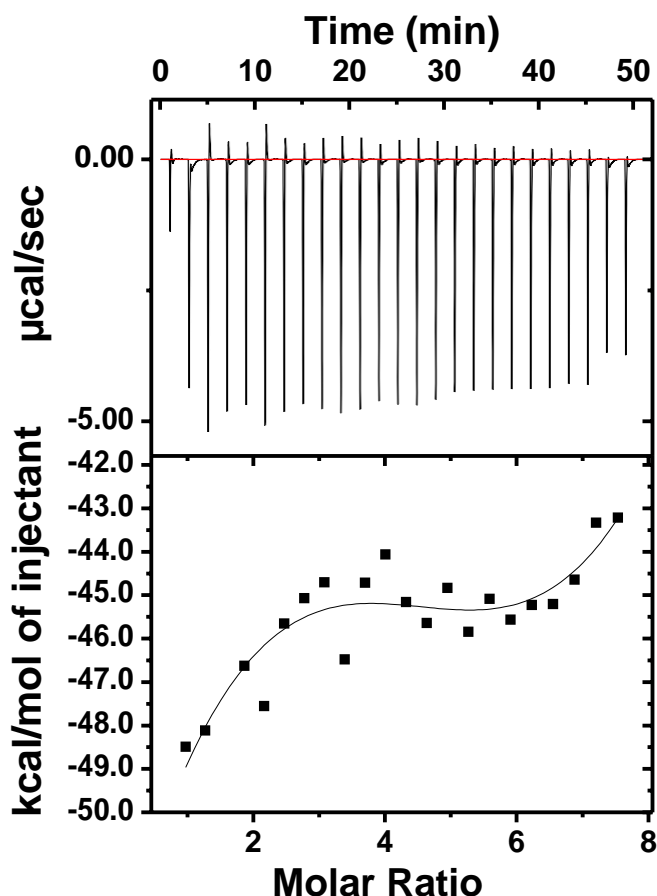

**Figure 36:** Plot of isothermal titration calorimetry.

**Table 11:** Thermodynamical parameter of **BSA-peptide** system from ITC measurement

| Sequential Binding    |       |                               |                                   |                            |
|-----------------------|-------|-------------------------------|-----------------------------------|----------------------------|
| $K_1 (\text{M}^{-1})$ | $N_1$ | $\Delta H_1 (\text{cal/mol})$ | $\Delta S_1 (\text{cal/mol/deg})$ | $\Delta G_1 (\text{Kcal})$ |
| $9.81 \times 10^3$    | ---   | $-4.694 \times 10^5$          | $-1.56 \times 10^3$               | - 5.44                     |
|                       |       |                               |                                   |                            |
| $K_2 (\text{M}^{-1})$ | $N_2$ | $\Delta H_2 (\text{cal/mol})$ | $\Delta S_2 (\text{cal/mol/deg})$ | $\Delta G_2 (\text{Kcal})$ |
| $2.33 \times 10^3$    | ---   | $-2.924 \times 10^6$          | $-9.79 \times 10^3$               | - 4.59                     |
| Two sites binding     |       |                               |                                   |                            |
| $K_1 (\text{M}^{-1})$ | $N_1$ | $\Delta H_1 (\text{cal/mol})$ | $\Delta S_1 (\text{cal/mol/deg})$ | $\Delta G_1 (\text{Kcal})$ |
| $1.78 \times 10^4$    | 0.939 | $4.106 \times 10^6$           | $1.38 \times 10^4$                | -5.8                       |
| $K_2 (\text{M}^{-1})$ | $N_2$ | $\Delta H_2 (\text{cal/mol})$ | $\Delta S_2 (\text{cal/mol/deg})$ | $\Delta G_2 (\text{Kcal})$ |
| $1.43 \times 10^4$    | 0.946 | $-5.349 \times 10^6$          | $-1.79 \times 10^4$               | - 5.6                      |



#### 7.4. FRET study between Pentapeptide\_2 and BSA Protein

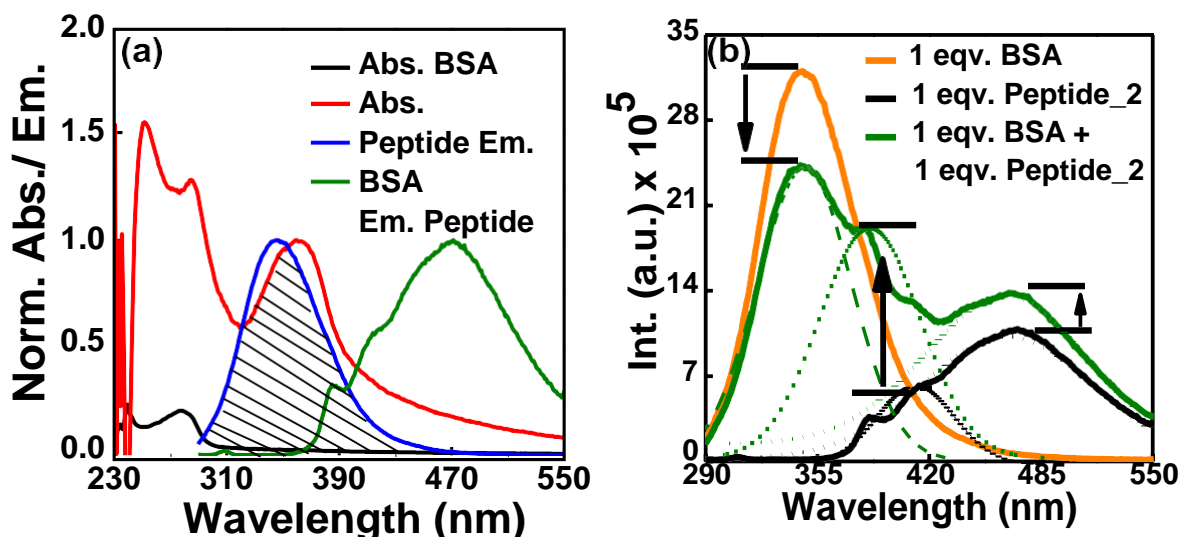

**Figure S37.** (a) Overlapping of emission spectra of **BSA** (act as a FRET donor) and the absorption spectra of **Pentapeptide 2** (act as a FRET acceptor) (4  $\mu$ M each, r.t.;  $\lambda_{ex}$  = 280 nm in Buffer). (b) Fluorescence spectra of individual donor (**BSA**) and acceptor **Pentapeptide 2** and 1 eqv. **BSA-Pentapep. 2**. In **Pentapeptide 2**, acceptor emission increased by almost 2.2 times in presence of donor, whereas the donor emission decreases almost 1.3 times of the individual donor emission. This change in fluorescence intensity is visual evidence of FRET (4  $\mu$ M each, r.t.;  $\lambda_{ex}$  = 280 nm in buffer).

#### Calculation of the Forster distance and FRET efficiency

The fluorescence resonance energy transfer (FRET) and the Förster distance for the FRET were calculated using the following three equations. The efficiency of energy transfer,  $E$ , was calculated using the equation (1)

$$E = \frac{R_0^6}{R_0^6 + r^6} = 1 - \frac{F}{F_0} \dots \dots \dots (1)$$

where  $F$  and  $F_0$  are the fluorescence intensity of donor in the presence and absence of acceptor,  $r$  is the distance between donor and the acceptor and  $R_0$  is the critical distance when the energy transfer efficiency is 50%. The Förster distance  $R_0$  (Å) was calculated by the following equation (2)

$$R_0 = [8.79 \times 10^{-5} \kappa^2 n^{-4} \Phi_D J(\lambda)]^{1/6} \dots \dots \dots (2)$$

where  $\kappa^2$  is the orientation,  $n$  is the refractive index of the medium,  $\Phi_D$  is the quantum yield of the donor in the absence of acceptor  $J(\lambda)$  is the overlap integral of the fluorescence emission spectrum of the donor and the absorption spectrum of the acceptor given by the following equation (3)

$$J = \frac{\int_0^\infty F_D(\lambda) \varepsilon_A(\lambda) \lambda^4 d\lambda}{\int_0^\infty F_D(\lambda) d\lambda} \dots\dots\dots(3)$$

where  $F_D(\lambda)$  is the fluorescence intensity of the donor in the wavelength range  $\lambda$  to  $\lambda + \Delta\lambda$  with the total intensity normalized to unity.  $\varepsilon_A(\lambda)$  is the molar extinction coefficient of the acceptor as a function of wavelength ( $\lambda$ ).

Using the values of  $\kappa^2 = 2/3$ ,  $n = 1.33$ ,  $\Phi_D = 0.058$ , and the obtained overlap integral,  $J(\lambda) = 4.33113 \times 10^{17}$

the  $R_0$  and  $r$  values were calculated which were found to be  $R_0 = 82.59 \text{ \AA}$  and  $r = 99 \text{ \AA}$ .  $R_0$  is the critical distance when the energy transfer efficiency is 50 % and  $r$  is the distance between the donor and acceptor.

Energy Transfer efficiency (E) =  $1 - F/F_0 = 25 \%$ .  $F$  and  $F_0$  are the fluorescence intensity of donor in the presence and absence of acceptor.

### Picture of Pentapeptide 2 and Pentapeptide 2 - BSA under Fluorescence light

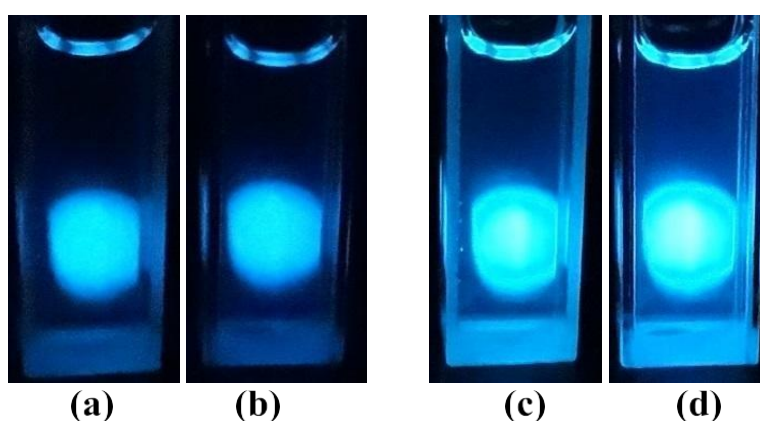

**Figure S38.** Picture under fluorescence light ( $\lambda_{\text{ex}} = 280 \text{ nm}$ ) of (a) Pentapeptide 2, (b) Pentapeptide 2 -BSA and  $\lambda_{\text{ex}} = 350 \text{ nm}$  (c) Pentapeptide 2 (d) Pentapeptide 2 -BSA in phosphate buffer.

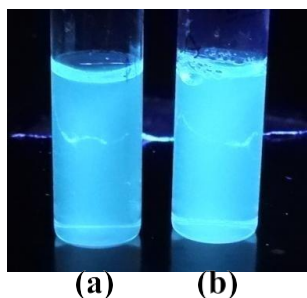

**Figure S39.** Picture under transilluminator ( $\lambda_{\text{ex}} = 365 \text{ nm}$ ) of (a) Pentapeptide **2**, (b) Pentapeptide **2** –BSA in phosphate buffer.

### 7.5. Life time table and Trace

**Table S12:** Summary table of fluorescence lifetimes of the peptides **2** with increasing BSA concentration at  $\lambda_{\text{ex}} = 290 \text{ nm}$

| Entry                                                                                                                                                                                                                                                                                                                                                                                   | Solvents                         | $\Phi_f$ | $\lambda$<br>[nm] | $\tau_1$ [ns] | $\tau_2$ [ns]  | $\langle\tau\rangle$<br>[ns] | $k_f$<br>[ $10^8 \text{ s}^{-1}$ ] | $k_{nr}$<br>[ $10^8 \text{ s}^{-1}$ ] | $\chi^2$ |
|-----------------------------------------------------------------------------------------------------------------------------------------------------------------------------------------------------------------------------------------------------------------------------------------------------------------------------------------------------------------------------------------|----------------------------------|----------|-------------------|---------------|----------------|------------------------------|------------------------------------|---------------------------------------|----------|
| <b>Only BSA</b>                                                                                                                                                                                                                                                                                                                                                                         | <b>Buffer</b><br>$\text{pH} = 7$ | 0.058    | 350               | 4.03<br>(35%) | 7.00<br>(65%)  | 6.51                         | 0.097                              | 1.57                                  | 1.01     |
| <b>1 eqv peptide+ 0.5 eqv BSA</b>                                                                                                                                                                                                                                                                                                                                                       | <b>Buffer</b><br>$\text{pH} = 7$ | 0.048    | 350               | 2.32<br>(24%) | 5.57<br>(76%)  | 4.84                         | 0.010                              | 1.96                                  | 1.06     |
| <b>1 eqv peptide+ 1.00 eqv BSA</b>                                                                                                                                                                                                                                                                                                                                                      | <b>Buffer</b><br>$\text{pH} = 7$ | 0.049    | 350               | 2.82<br>(17%) | 6.42<br>(83%)  | 5.79                         | 0.077                              | 1.64                                  | 1.01     |
| <b>1 eqv peptide+ 2.00 eqv BSA</b>                                                                                                                                                                                                                                                                                                                                                      | <b>Buffer</b><br>$\text{pH} = 7$ | 0.045    | 350               | 2.99<br>(17%) | 6.49<br>(83%)  | 5.89                         | 0.066                              | 1.63                                  | 0.98     |
|                                                                                                                                                                                                                                                                                                                                                                                         |                                  |          |                   |               |                |                              |                                    |                                       |          |
| <b>Only Peptide 2</b>                                                                                                                                                                                                                                                                                                                                                                   | <b>Buffer</b><br>$\text{pH} = 7$ | 0.030    | 410               | 2.85<br>(31%) | 25.19<br>(68%) | 19.74                        | 0.020                              | 0.486                                 | 1.06     |
| <b>1 eqv peptide+ 0.50 eqv BSA</b>                                                                                                                                                                                                                                                                                                                                                      | <b>Buffer</b><br>$\text{pH} = 7$ | 0.039    | 410               | 5.09<br>(42%) | 27.58<br>(58%) | 18.29                        | 0.026                              | 0.519                                 | 1.03     |
| <b>1 eqv peptide+ 1.00 eqv BSA</b>                                                                                                                                                                                                                                                                                                                                                      | <b>Buffer</b><br>$\text{pH} = 7$ | 0.036    | 410               | 5.97<br>(54%) | 32.79<br>(45%) | 18.17                        | 0.024                              | 0.525                                 | 1.05     |
| <b>1 eqv peptide+ 2.00 eqv BSA</b>                                                                                                                                                                                                                                                                                                                                                      | <b>Buffer</b><br>$\text{pH} = 7$ | 0.032    | 410               | 6.0<br>(63%)  | 26.90<br>(36%) | 13.58                        | 0.028                              | 0.707                                 | 1.01     |
|                                                                                                                                                                                                                                                                                                                                                                                         |                                  |          |                   |               |                |                              |                                    |                                       |          |
| <b>Only Peptide 2</b>                                                                                                                                                                                                                                                                                                                                                                   | <b>Buffer</b><br>$\text{pH} = 7$ | 0.041    | 470               | 2.92<br>(33%) | 13.79<br>(66%) | 10.13                        | 0.03                               | 0.94                                  | 1.04     |
| <b>1 eqv peptide+ 0.5 eqv BSA</b>                                                                                                                                                                                                                                                                                                                                                       | <b>Buffer</b><br>$\text{pH} = 7$ | 0.046    | 470               | 3.25<br>(36%) | 14.61<br>(63%) | 10.48                        | 0.046                              | 0.906                                 | 1.04     |
| <b>1 eqv peptide+ 1 eqv BSA</b>                                                                                                                                                                                                                                                                                                                                                         | <b>Buffer</b><br>$\text{pH} = 7$ | 0.044    | 470               | 3.41<br>(34%) | 14.49<br>(65%) | 10.65                        | 0.042                              | 0.896                                 | 1.03     |
| <b>1 eqv peptide+ 2.00 eqv BSA</b>                                                                                                                                                                                                                                                                                                                                                      | <b>Buffer</b><br>$\text{pH} = 7$ | 0.044    | 470               | 3.40<br>(33%) | 14.56<br>(67%) | 10.84                        | 0.035                              | 0.886                                 | 1.03     |
| For lifetimes of the fluorescent amino acids $\lambda_{\text{ex}} = 290 \text{ nm}$ ; Concentration of the peptide = $10 \mu\text{M}$ ; $\langle\tau\rangle$ , $k_f$ , and $k_{nr}$ are weighted means from the biexponential fits: $\langle\tau\rangle = 1/(\alpha_1/\tau_1 + \alpha_2/\tau_2)$ , $k_f = \Phi_f/\langle\tau\rangle$ , and $k_{nr} = (1 - \Phi_f)/\langle\tau\rangle$ . |                                  |          |                   |               |                |                              |                                    |                                       |          |

**Table S13:** Summary table of fluorescence lifetimes of the peptides **2** with increasing BSA concentration at  $\lambda_{\text{ex}} = 375 \text{ nm}$

| Entry                                  | Solvent<br>s                        | $\Phi_f$ | $\lambda$<br>[nm] | $\tau_1$ [ns] | $\tau_2$ [ns]    | $\langle \tau \rangle$<br>[ns] | $k_f$<br>[10 <sup>8</sup> s <sup>-1</sup> ] | $k_{nr}$<br>[10 <sup>8</sup> s <sup>-1</sup> ] | $\chi^2$ |
|----------------------------------------|-------------------------------------|----------|-------------------|---------------|------------------|--------------------------------|---------------------------------------------|------------------------------------------------|----------|
| <b>Only Peptide 3</b>                  | <b>Buffer<br/>P<sup>H</sup> = 7</b> | 0.043    | 410               | 2.19<br>(38%) | 9.8<br>(62%)     | 6.90                           | 0.10<br>5                                   | 1.34                                           | 0.99     |
| <b>1 eqv peptide+<br/>0.50 eqv BSA</b> | <b>Buffer<br/>P<sup>H</sup> = 7</b> | 0.049    | 410               | 2.53<br>(34%) | 21.16<br>(66%)   | 14.74                          | 0.05<br>6                                   | 0.62<br>2                                      | 1.09     |
| <b>1 eqv peptide+<br/>1.00 eqv BSA</b> | <b>Buffer<br/>P<sup>H</sup> = 7</b> | 0.051    | 410               | 2.62<br>(33%) | 21.66<br>(67%)   | 15.36                          | 0.05                                        | 0.60                                           | 1.09     |
| <b>1 eqv peptide+<br/>2.00 eqv BSA</b> | <b>Buffer<br/>P<sup>H</sup> = 7</b> | 0.052    | 410               | 2.92<br>(35%) | 21.27<br>(65%)   | 14.74                          | 0.05<br>3                                   | 0.62<br>4                                      | 1.07     |
|                                        |                                     |          |                   |               |                  |                                |                                             |                                                |          |
| <b>Only Peptide 2</b>                  | <b>Buffer<br/>P<sup>H</sup> = 7</b> | 0.048    | 470               | 3.86<br>(37%) | 16.62<br>(62.7%) | 11.86                          | 0.06<br>1                                   | 0.78<br>1                                      | 1.07     |
| <b>1 eqv peptide+<br/>0.50 eqv BSA</b> | <b>Buffer<br/>P<sup>H</sup> = 7</b> | 0.055    | 470               | 3.79<br>(37%) | 16.63<br>(63%)   | 11.85                          | 0.07<br>0                                   | 0.77<br>3                                      | 1.04     |
| <b>1 eqv peptide+<br/>1.00 eqv BSA</b> | <b>Buffer<br/>P<sup>H</sup> = 7</b> | 0.055    | 470               | 3.9<br>(38%)  | 17.34<br>(61%)   | 12.19                          | 0.06<br>3                                   | 0.56<br>7                                      | 1.08     |
| <b>1 eqv peptide+<br/>2.00 eqv BSA</b> | <b>Buffer<br/>P<sup>H</sup> = 7</b> | 0.056    | 470               | 3.88<br>(37%) | 16.92<br>(62%)   | 12.09                          | 0.06<br>5                                   | 0.76<br>1                                      | 1.08     |

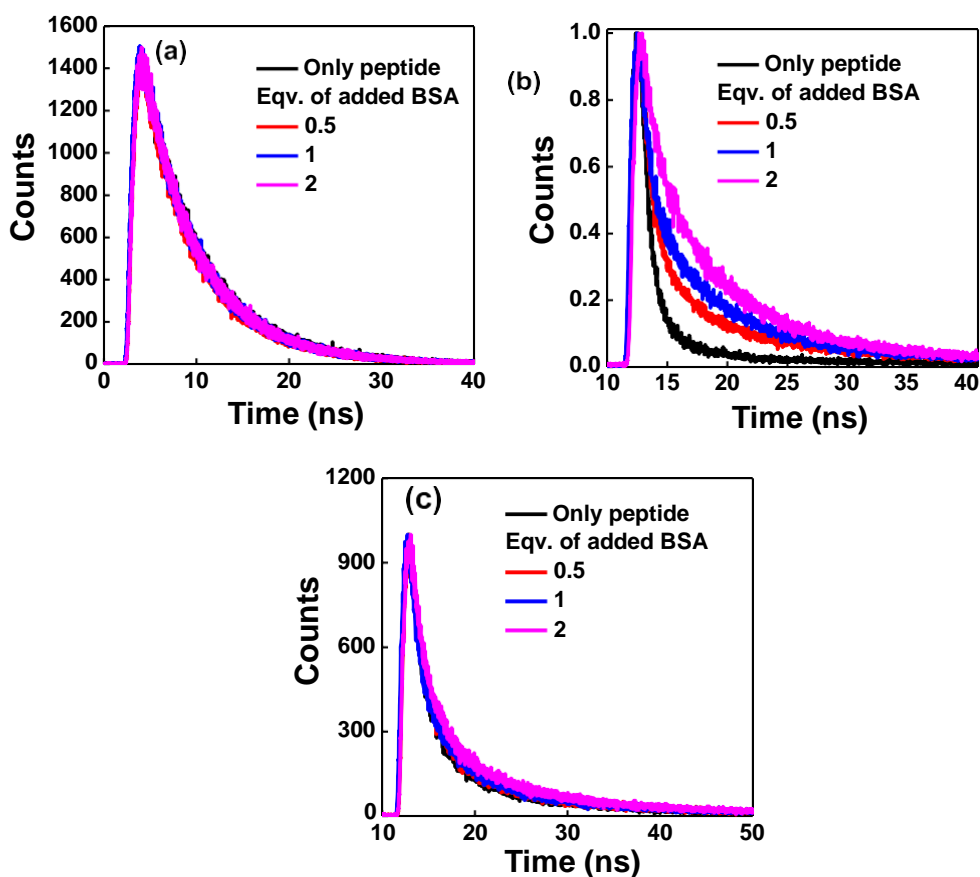

**Figure S40.** Time resolved fluorescence spectra of pentapeptide **2** trituted with increasing concentration of BSA using 290 LED in (a)  $\lambda_{\text{ex}} = 290 \text{ nm}$ ,  $\lambda_{\text{em}} = 350 \text{ nm}$ ; (b)  $\lambda_{\text{ex}} = 290 \text{ nm}$ ,  $\lambda_{\text{em}} = 410 \text{ nm}$ . (c)  $\lambda_{\text{ex}} = 290 \text{ nm}$ ,  $\lambda_{\text{em}} = 470 \text{ nm}$ . [peptide] = 10  $\mu\text{M}$  and [BSA] = 5, 10, 15 and 20  $\mu\text{M}$ .

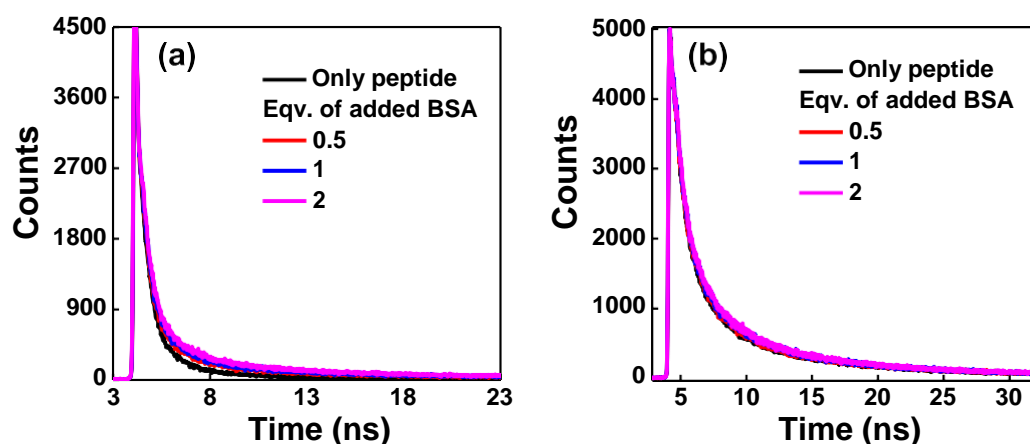

**Figure S41.** Time resolved fluorescence spectra of pentapeptide **2** trituted with increasing concentration of BSA using 375 LESER in (a)  $\lambda_{\text{ex}} = 375 \text{ nm}$ ,  $\lambda_{\text{em}} = 410 \text{ nm}$ ; (b)  $\lambda_{\text{ex}} = 375 \text{ nm}$ ,  $\lambda_{\text{em}} = 470 \text{ nm}$ . [peptide] = 10  $\mu\text{M}$  and [BSA] = 5, 10, 15 and 20  $\mu\text{M}$ .

## 7.6. Steady State Anisotropy and Polarisation study

**Table S14:** Summary table of steady state anisotropy and polarisation of the peptides **2** with increasing BSA concentration at  $\lambda_{\text{ex}} = 350 \text{ nm}$ ,  $\lambda_{\text{em}} = 385 \text{ nm}$  and **472 nm**.

| Entry                       | Solvents        | Anisotropy                             |                                        | Polarisation                           |                                        |
|-----------------------------|-----------------|----------------------------------------|----------------------------------------|----------------------------------------|----------------------------------------|
|                             |                 | $\lambda_{\text{em}} = 385 \text{ nm}$ | $\lambda_{\text{em}} = 472 \text{ nm}$ | $\lambda_{\text{em}} = 385 \text{ nm}$ | $\lambda_{\text{em}} = 472 \text{ nm}$ |
| Only Penta peptide          | Buffer (pH=7.0) | 0.025                                  | 0.0153                                 | 0.038                                  | 0.02278                                |
| 1 eqv.Peptide +0.25 eqv.BSA | Buffer (pH=7.0) | 0.08887                                | 0.02081                                | 0.12764                                | 0.03089                                |
| 1 eqv.Peptide +0.50 eqv.BSA | Buffer (pH=7.0) | 0.10623                                | 0.01931                                | 0.15131                                | 0.02869                                |
| 1 eqv.Peptide +0.75 eqv.BSA | Buffer (pH=7.0) | 0.11312                                | 0.02053                                | 0.1606                                 | 0.03049                                |
| 1 eqv.Peptide +1.00 eqv.BSA | Buffer (pH=7.0) | 0.11492                                | 0.02225                                | 0.16302                                | 0.033                                  |
| 1 eqv.Peptide +1.50 eqv.BSA | Buffer (pH=7.0) | 0.12768                                | 0.02412                                | 0.18003                                | 0.03575                                |
| 1 eqv.Peptide +2.0 eqv.BSA  | Buffer (pH=7.0) | 0.13569                                | 0.02882                                | 0.19061                                | 0.04261                                |
| 1 eqv.Peptide +2.5 eqv.BSA  | Buffer (pH=7.0) | 0.13217                                | 0.03047                                | 0.18596                                | 0.04502                                |
| 1 eqv.Peptide +3.0 eqv.BSA  | Buffer (pH=7.0) | 0.14056                                | 0.03123                                | 0.19699                                | 0.04612                                |
| 1 eqv.Peptide +4.0 eqv.BSA  | Buffer (pH=7.0) | 0.13998                                | 0.0337                                 | 0.19624                                | 0.04971                                |
| 1 eqv.Peptide +5.0 eqv.BSA  | Buffer (pH=7.0) | 0.14484                                | 0.03464                                | 0.20259                                | 0.05108                                |
| 1 eqv.Peptide +7.0 eqv.BSA  | Buffer (pH=7.0) | 0.15                                   | 0.04307                                | 0.2093                                 | 0.06325                                |

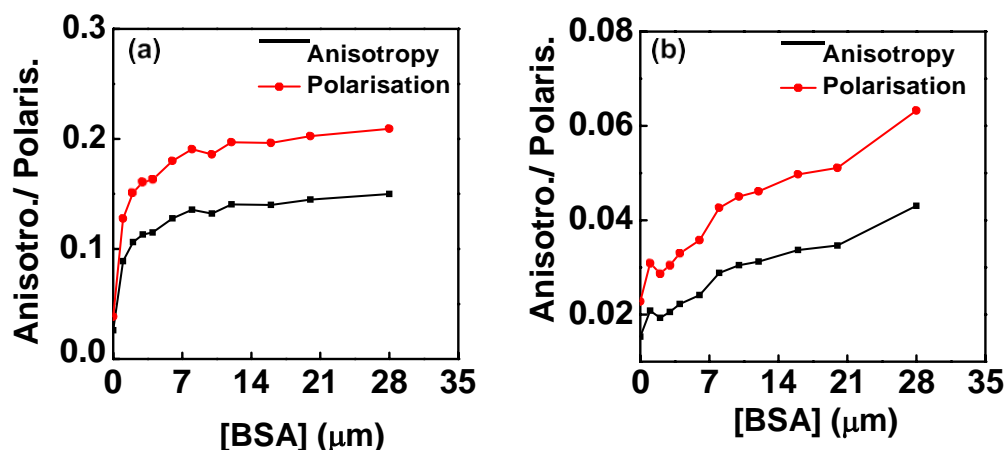

**Figure S42:** Steady-state anisotropy and polarisation plot (a)  $\lambda_{em} = 385$  nm (b)  $\lambda_{em} = 472$  nm of Pentapeptide fluorophore in presence of increasing BSA concentration. [Pentapeptide] = 4  $\mu$ M and [BSA] = 0, 1, 2, 3, 4, 6, 8, 12, 16, 20, 24, 28  $\mu$ M.

### 7.7. Study of Circular Dichroism Spectroscopy

Circular dichroism spectra were recorded using a CD spectropolarimeter with a cell path length of 1 mm at 25 °C. Samples concentration 10  $\mu$ M.

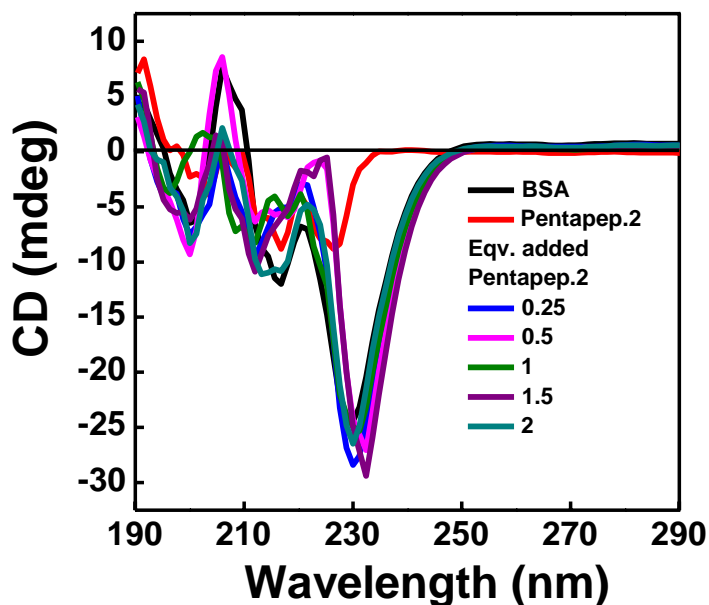

**Figure S43.** CD spectra of BSA in presence of increasing concentration of fluorophoric pentapeptide **2** in phosphate buffer (2% DMF). [BSA] = 10  $\mu$ M and [Pentapeptide] = 2.5, 5, 10, 15, 20,  $\mu$ M.

## 7.8. Molecular docking calculation

Docking calculations were carried out using Autodock4 (Bikadi, Hazai, 2009). The amino acid sequence of BSA protein was observed from the NCBI website, <http://www.ncbi.nlm.nih.gov/protein/CAA76847.1>. The 3D model of the BSA protein

was built using the 3D structure 1AO6 chain 'A' as template using the ESyPred3D11 web server. This template shares 72.4% identities with the BSA sequence. Following is the

BSA sequence which was used to generate the 3D model. >gi|3336842|emb|CAA76847.1| bovine serum albumin [Bos taurus]

<http://www.rcsb.org/pdb/results/results.do?grid=D081659C&tabtoshow=Current>

MKWVTFISLLLLFSSAYSRGVFRDTHKSEIAHRFKDLGEEHFKGLVLIAFSQYL  
QQCPFDEHVKLVNELTEFAKTCVADESHAGCEKSLHTLFGDELCKVASLRETYG  
DMADCCEKQEPERNECFLSHKDDSPDLPKLKDPNTLCDEFKADEKKFWGKYL  
YEIARRHPYFYAPELLYYANKYNGVFQECCQAEDKGACLLPKIETMREKVLTS  
ARQRLRCASIQKFGERALKAWSVARLSQKFPKAEFVEVTKLVTDLTKVHKECCH  
GDLLECADDRADLAKYICDNQDTISSKLKECCDKPLLEKSHCIAEVEKDAIPENLP  
PLTADFAEDKDVCKNYQEAKDAFLGSFLYEYSRRHPEYAVSVLLRLAKEYEATL  
EECCA KDDPHACYSTVFDKCLKHLVDEPQNLIKQNC DQFEKLGEYGFQNALIVRY  
TRKVPQVSTPTLVEVSRSLGKVGTRCCTKPESERMPCTEDYLSLILNRLCVLHEK  
TPVSEKVTKCCTESLVNRRPCFSALTPDETYVPKAFDEKLFTFHADICTLPDTEKQ  
IKKQTALVELLKHKPKATEEQLKTVMENFVAFVDKCCAADDKEACFAVEGPKL  
VVSTQTALA

Among the various conformation of Peptide **2** with BSA from docking result, the docking pose (rank-2) was shown in **Figure S44**. This conformer showed that the peptide binds in hydrophobic pocket of subdomain IB in site-I. From the result it was also observed that the C-terminal pyrene triazole of peptide 2 is surrounded by the hydrophobic amino acid side chain. Thus it is conclude that the interaction between Peptide 2 and BSA is strongly hydrophobic in nature. It was also observed that the close proximity of tryptophan (Trp-134) with triazolyl pyrene also support the possibilities of energy transfer (FRET) process in the peptide 2 - BSA protein sysrem. The free energy of binding ( $\Delta G$ ) of Pentapeptide 2-BSA complex obtained from the docking calculation is  $-7.10 \text{ kcal mol}^{-1}$  which is close to our experimental value  $-7.16 \text{ kcal mol}^{-1}$  calculated from the Benesi–Hildebrand plot.



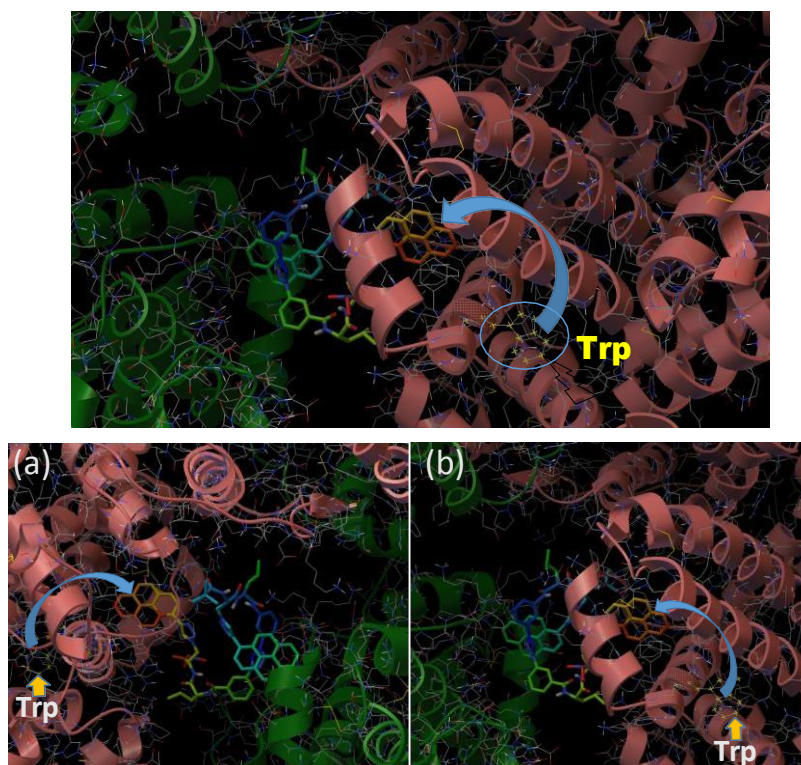

**Figure S44:** Docking pose of **pentapeptide 2 - BSA** (a) front side view (b) back side view.

**Table S15:** Energy of Pentapeptide **2-BSA** complex obtained from Autodock4

|                                  |          |
|----------------------------------|----------|
| Interaction Energy               | kcal/mol |
| Estimated Free Energy of Binding | -7.10    |
| Final Intermolecular Energy      | -14.55   |
| vdW + Hbond + desolv Energy      | -13.45   |
| Electrostatic Energy             | -1.11    |
| Final Total Internal Energy      | -8.67    |
| Torsional Free Energy            | +7.46    |
| Unbound System's Energy          | -8.67    |

## 7.9. Determination of the Detection Limit of BSA protein

We have determined quantitatively the BSA protein by our synthesized pentapeptide **2**. To evaluate the detection limit of BSA, we have plotted  $(I_{min} - I)/(I_{min} - I_{max})$  vs log of added concentration of BSA taking increased **TPy** monomer emission wavelength at 385 nm when excited at 280 nm (absorption of the scaffold, **ArTAA** and BSA). The linear fit was drawn by taking the nine points (conc. of BSA 1  $\mu$ M to 28  $\mu$ M) of the linear region. The extended line where it crossed the coordinate axes is the detection limit of BSA which was found to be 0.054  $\mu$ g/ml.

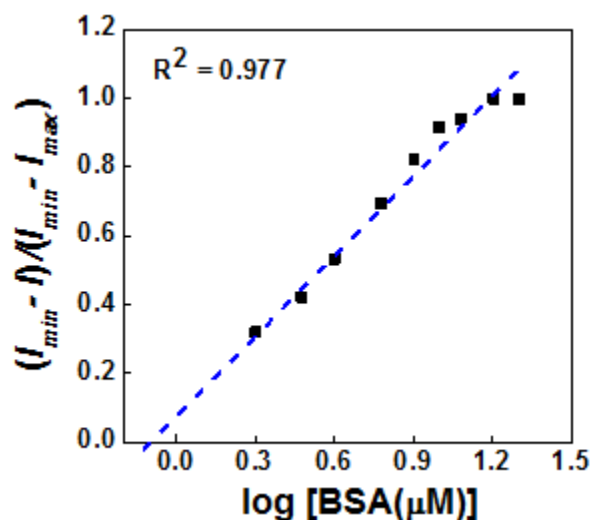

**Figure S45.** Plot of  $(I_{min} - I)/(I_{min} - I_{max})$  vs  $\log (\text{Conc. BSA})$  of pentapeptide 2 titrated with BSA protein.

## 8. Studies on the interaction of Pentapeptide 2 with $\alpha$ -Amylase

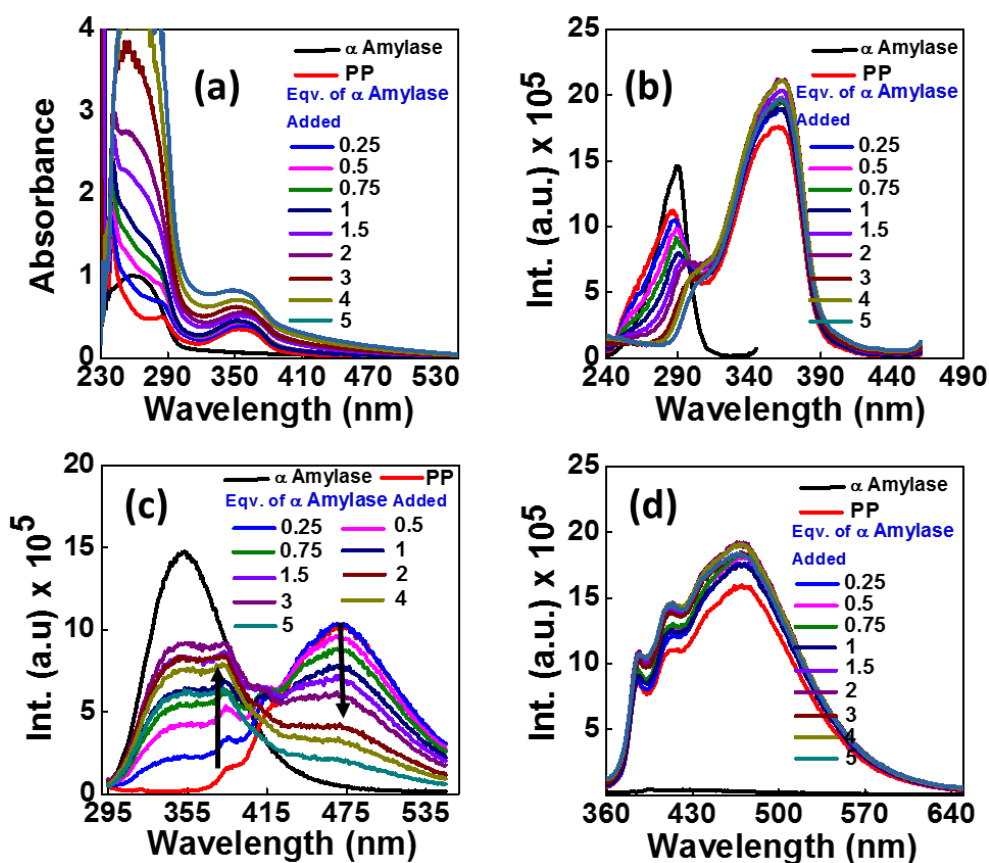

**Figure S46:** (a) UV-visible and (b) excitation spectra ( $\lambda_{ex} = 470$  nm), (c) emission spectra ( $\lambda_{ex} = 280$  nm) and (d) emission spectra ( $\lambda_{ex} = 350$  nm) of Pentapeptide 2 in presence of increasing  $\alpha$ -amylase concentration at 298K. [Pentapeptide] = 10  $\mu\text{M}$  and [ $\alpha$ -amylase] = 0, 2.5, 5, 7.5, 10, 15, 20, 30, 40, 50  $\mu\text{M}$

### 8.1. Relative change of fluorescence intensity of pentapeptide 2 with BSA and $\alpha$ -Amylase

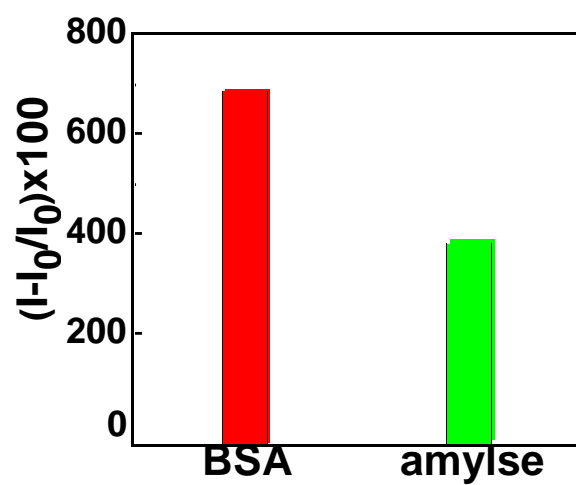

**Figure S47:** Plot of relative change of the fluorescence intensity of pentapeptide 2 with BSA and  $\alpha$ -Amylase protein.

# 9. $^1\text{H}$ and $^{13}\text{C}$ NMR spectra of synthesized compound

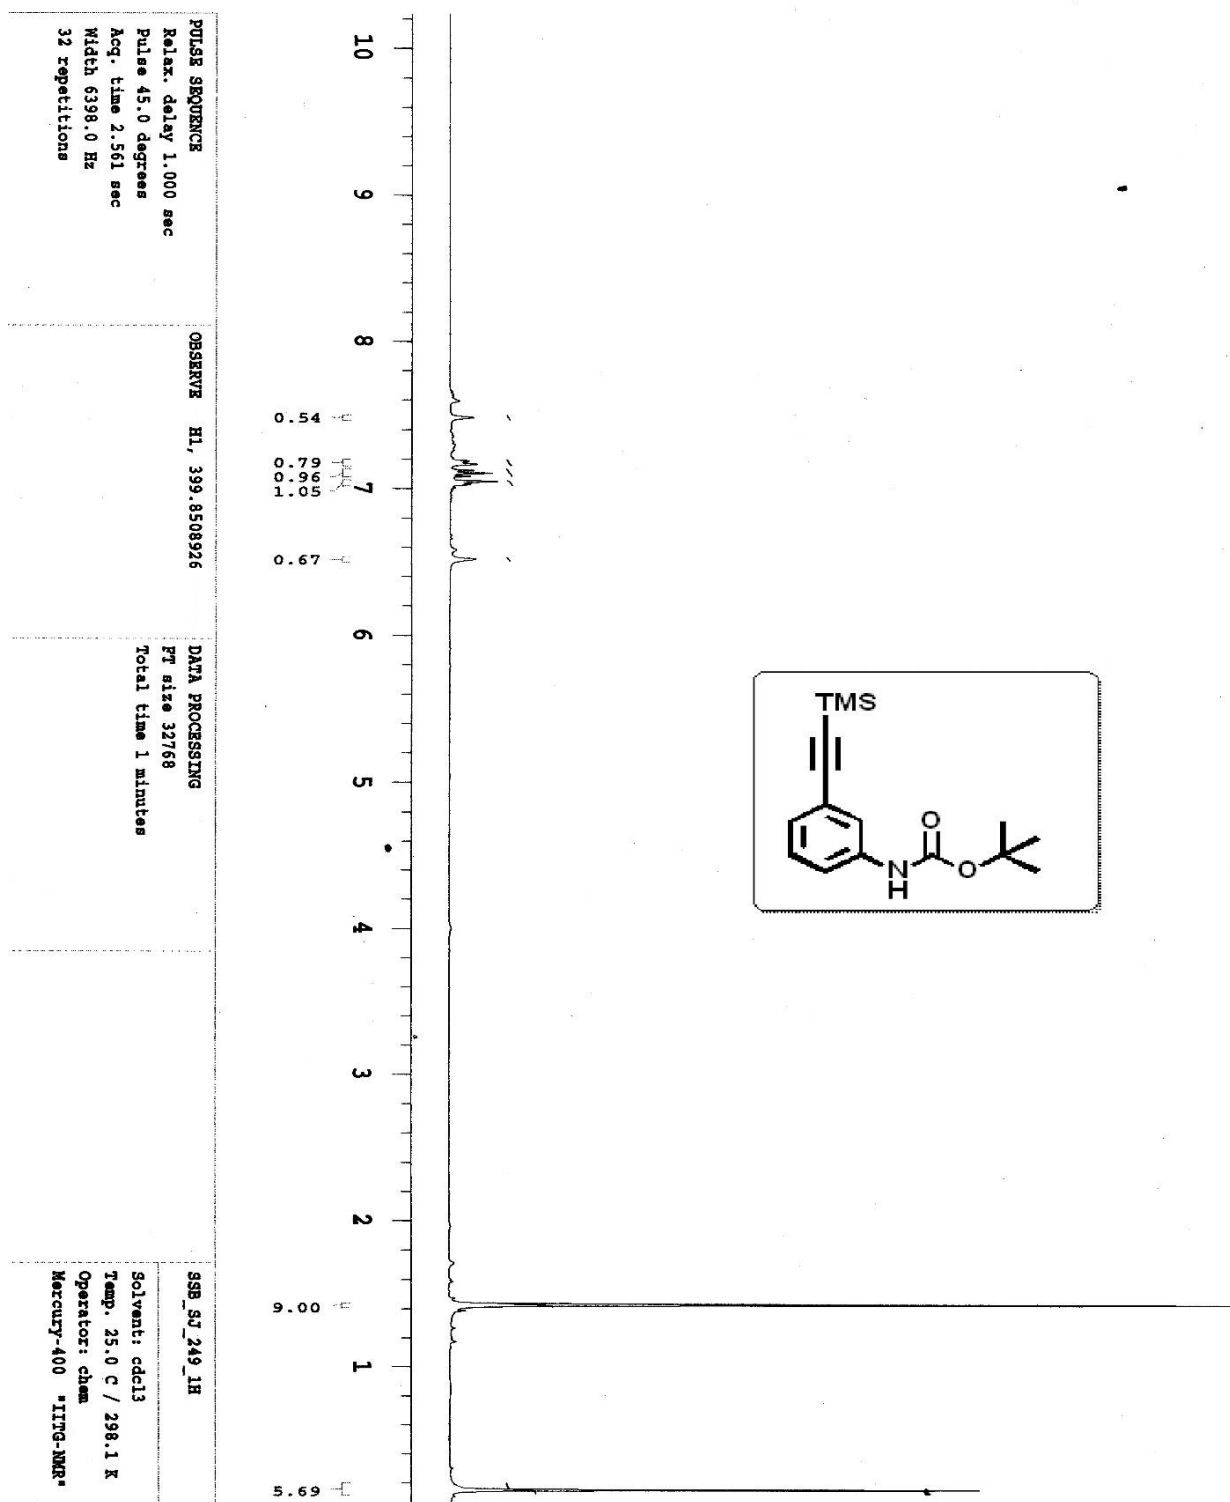

Figure S48.  $^1\text{H}$  Spectra of synthesized compound 9.

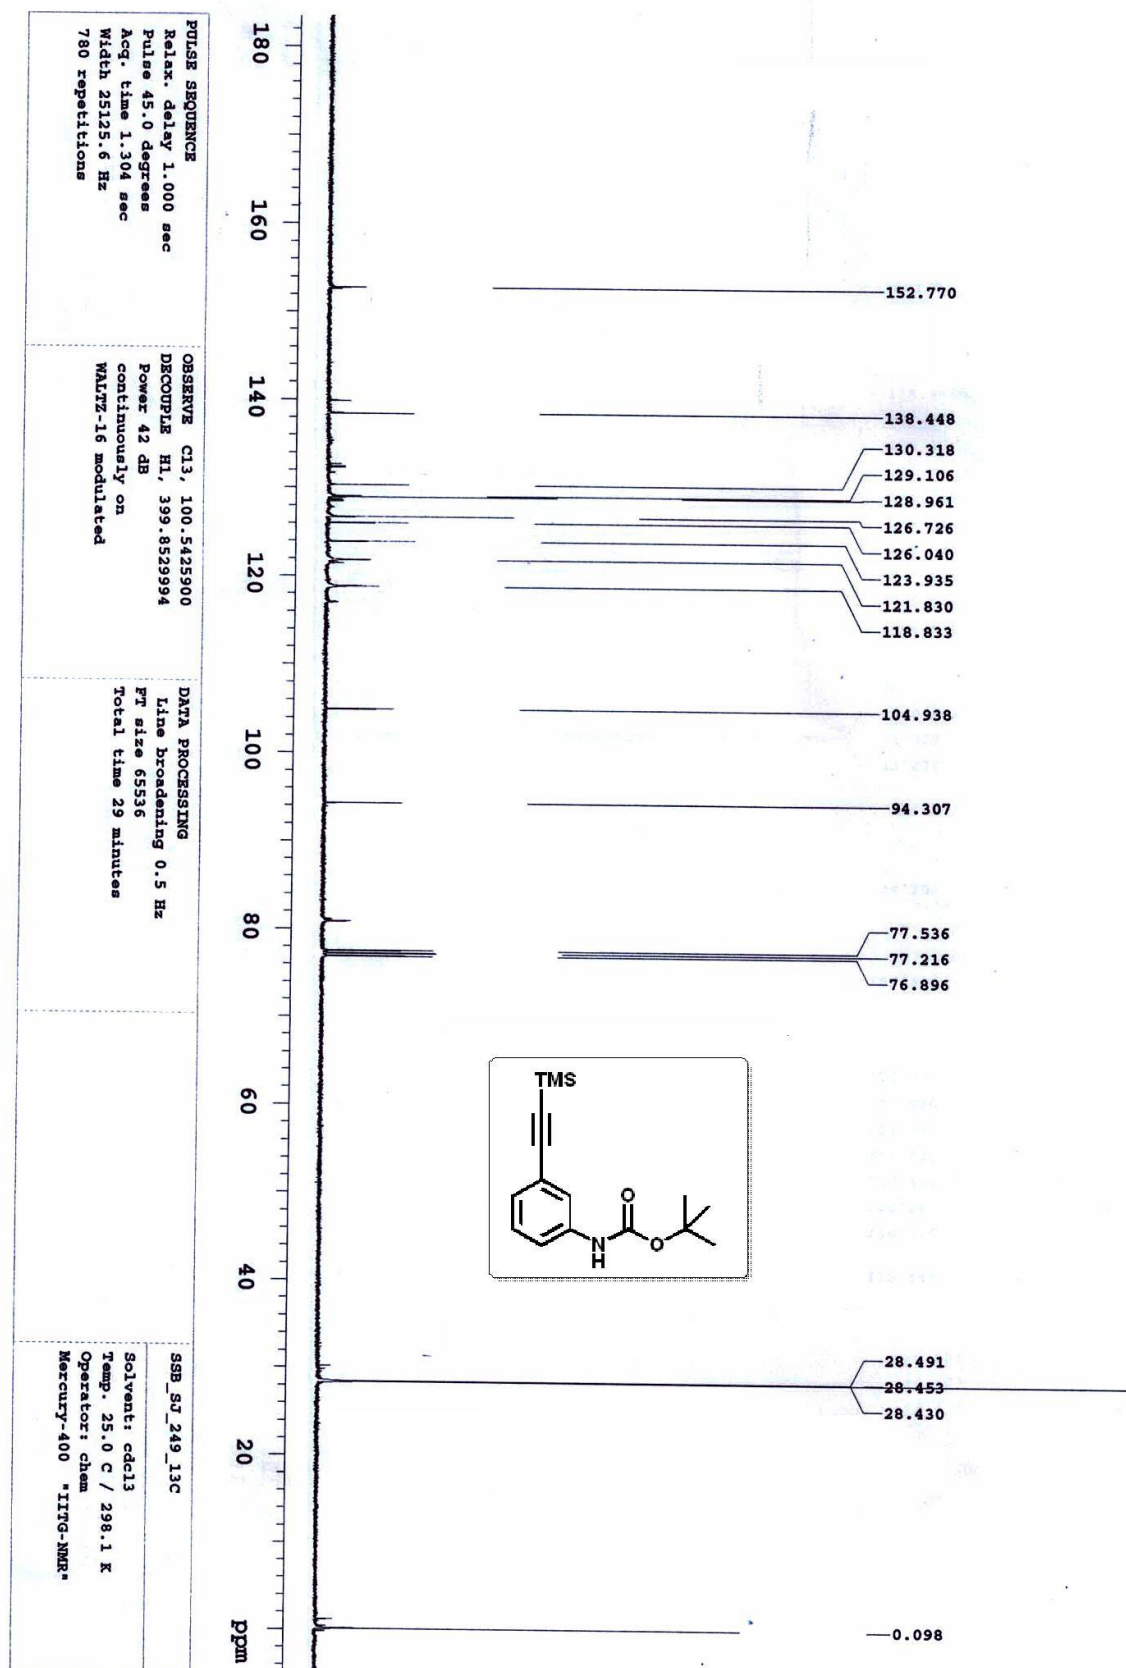

Figure S49.  $^{13}\text{C}$  Spectra of synthesized compound 9.

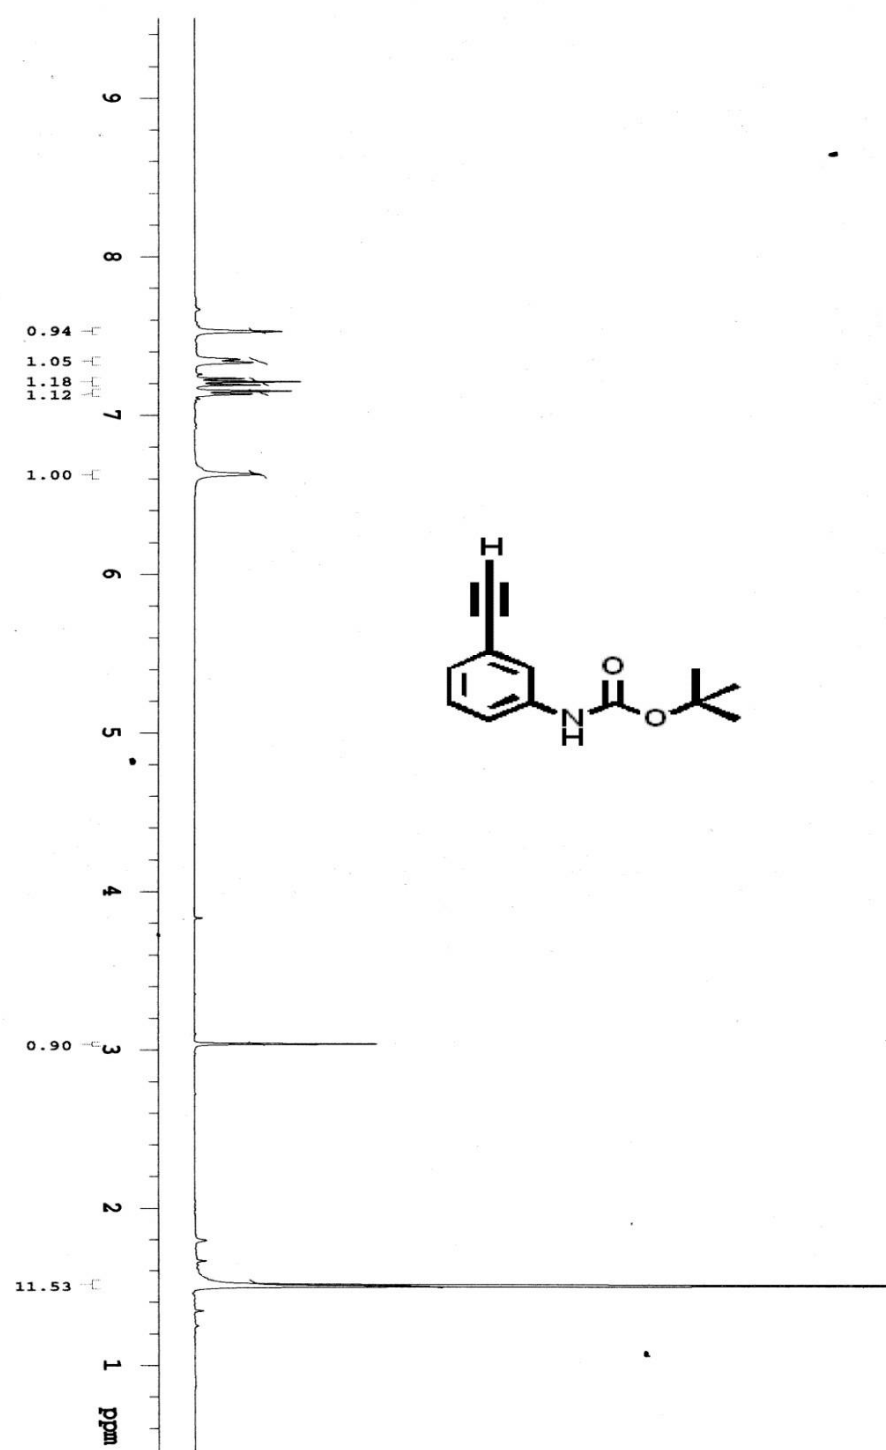

**Figure S50.**  $^1\text{H}$  Spectra of synthesized compound 10.

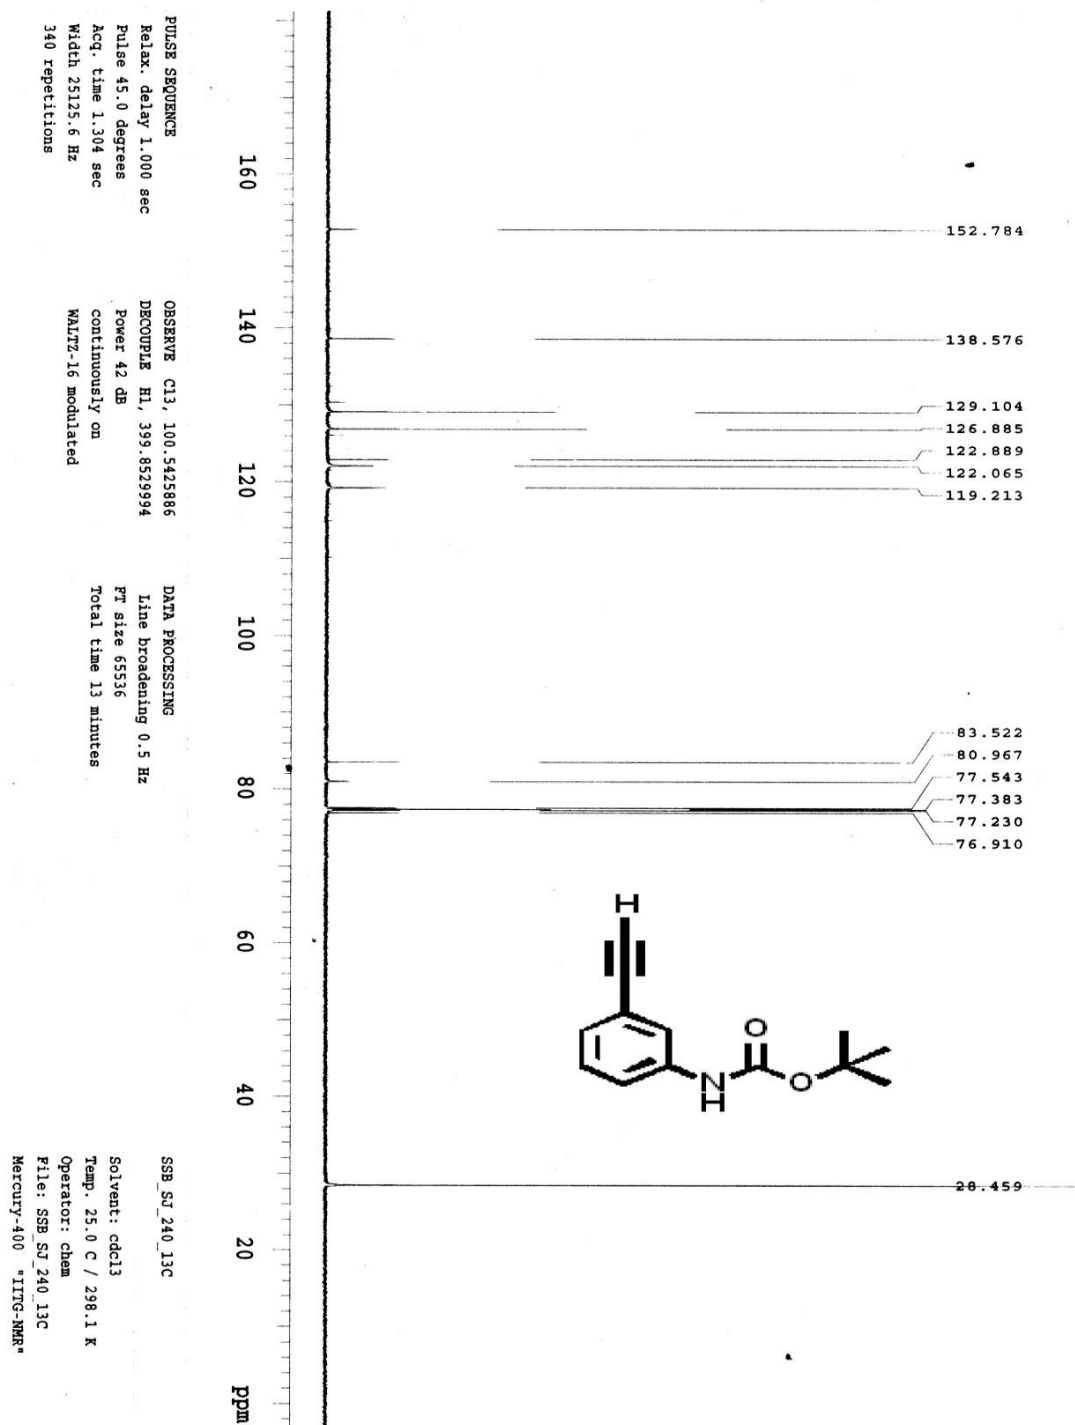

**Figure S51.**  $^{13}\text{C}$  Spectra of synthesized compound 10.

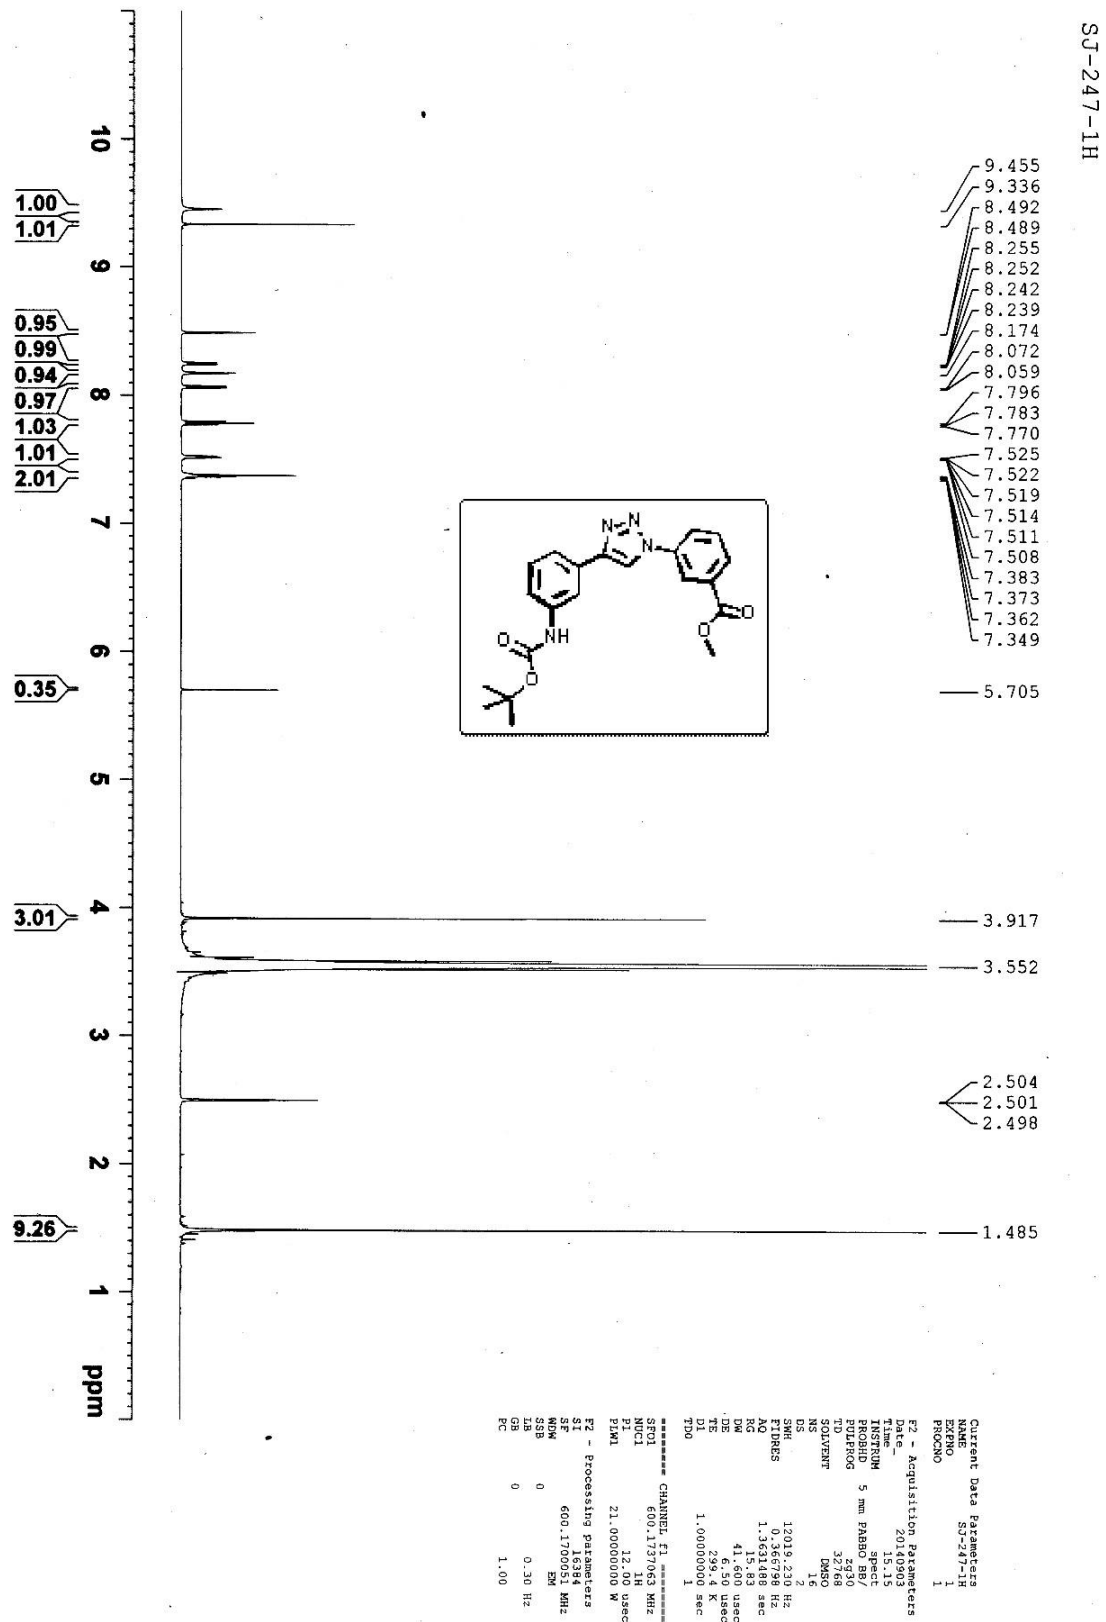

Figure S52. <sup>1</sup>H Spectra of synthesized compound 11.



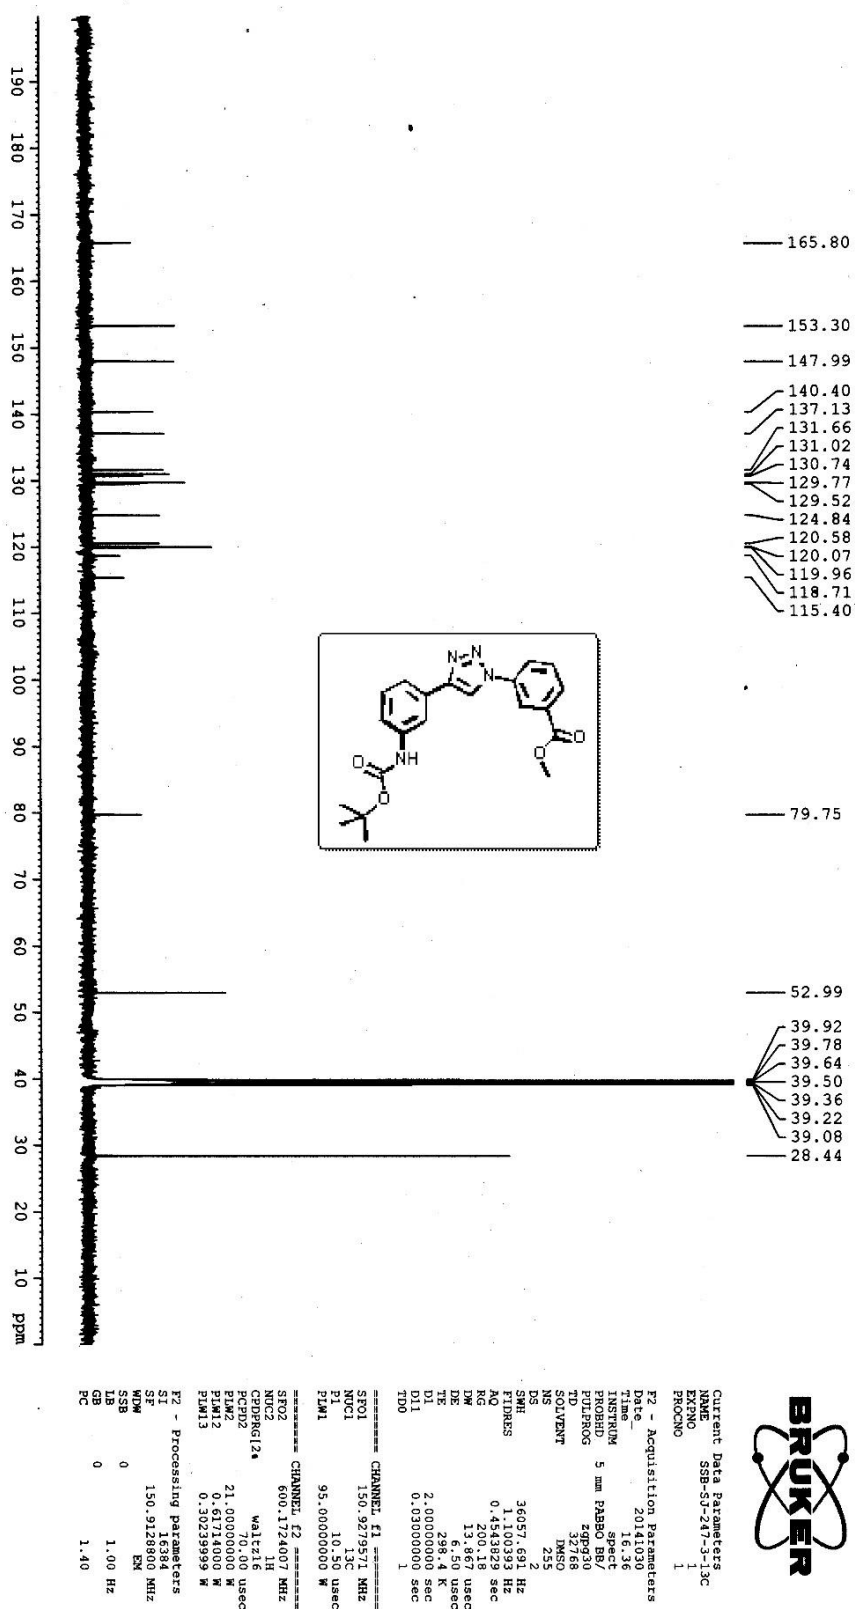Figure S53. <sup>13</sup>C Spectra of synthesized compound 11.

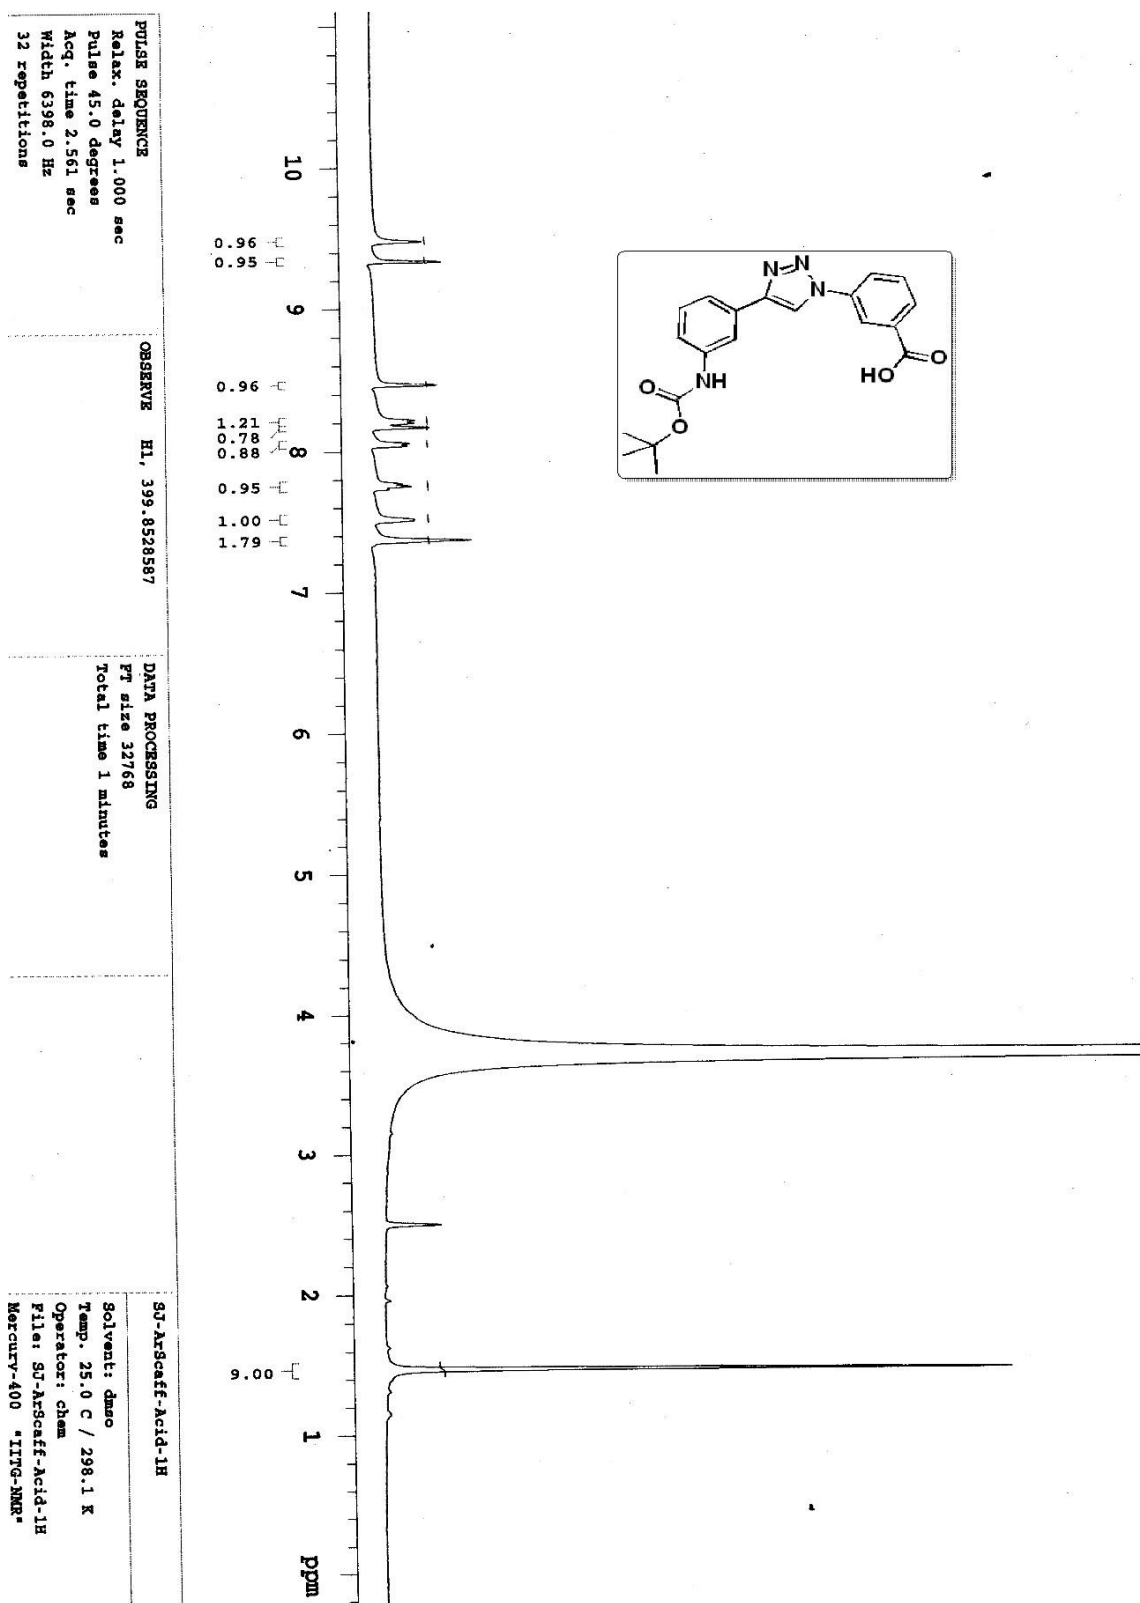

Figure S54. <sup>1</sup>H Spectra of synthesized compound 1.

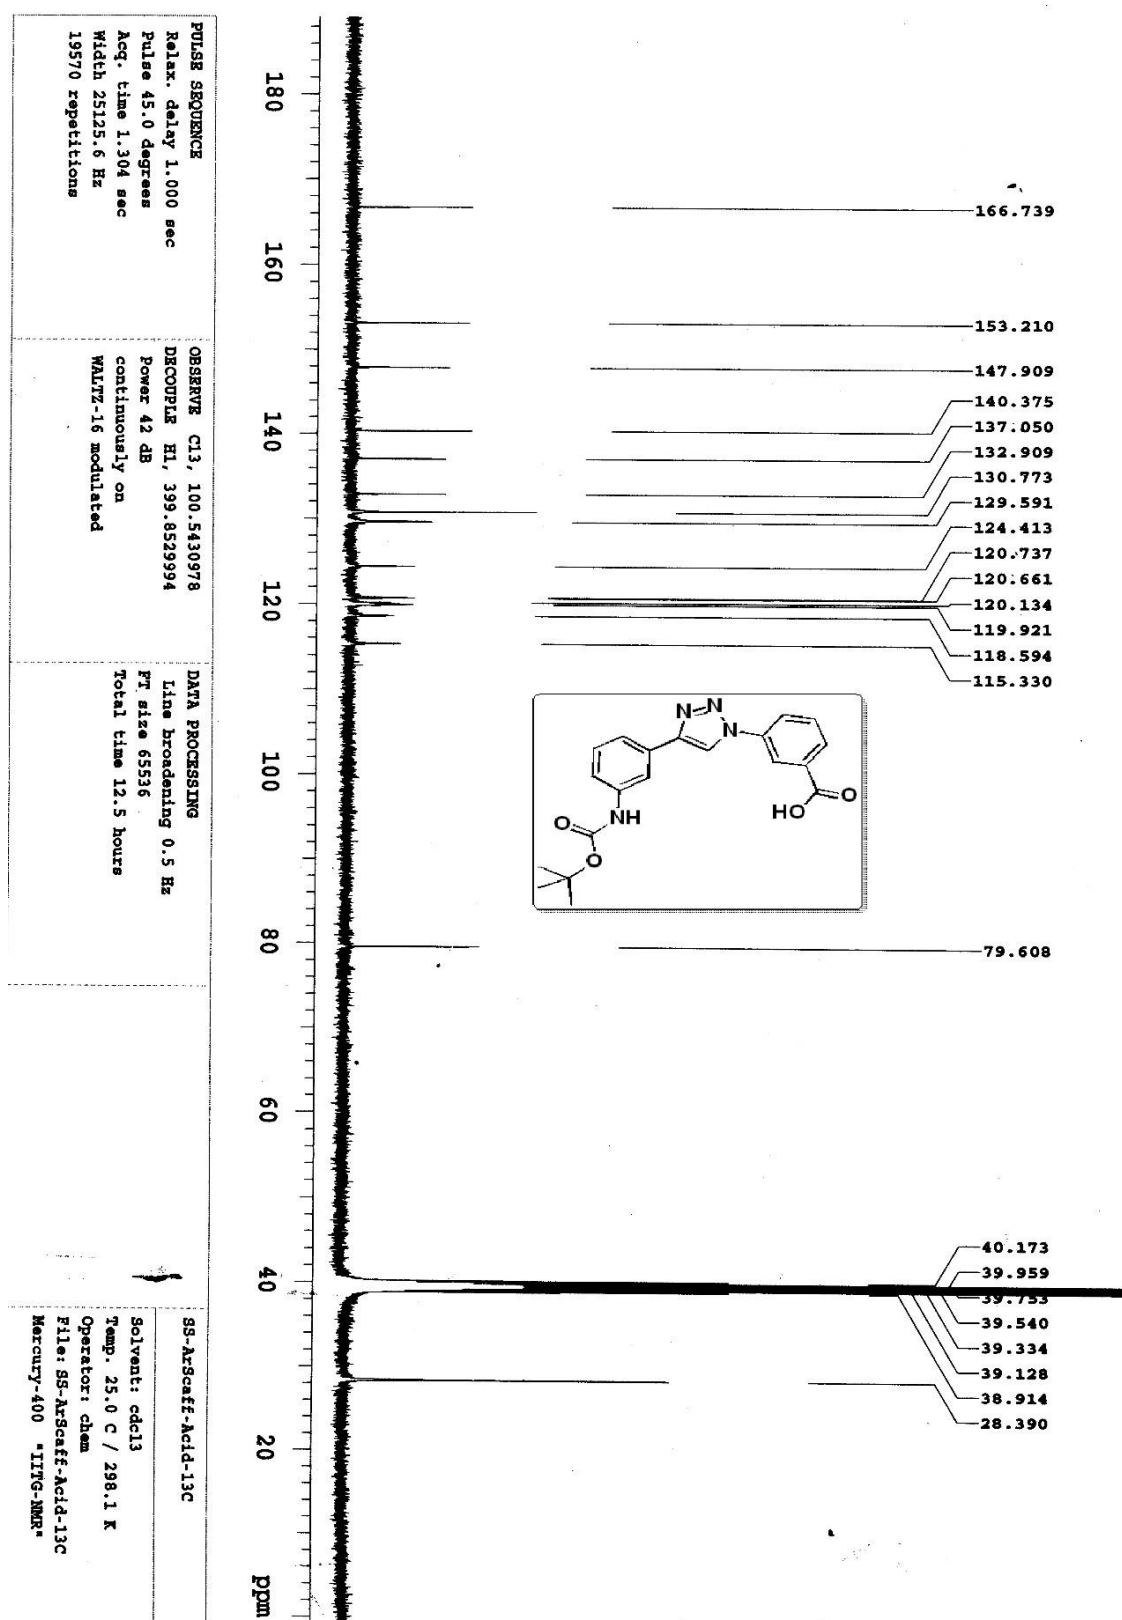

Figure S55. <sup>13</sup>C Spectra of synthesized compound 1.

1H NMR Spectrum (400 MHz, CDCl3) of compound 15. The spectrum shows peaks at 1.17, 1.33, 1.69, 2.05, 2.87, 2.91, 3.02, 3.08, 3.12, 3.16, 3.20, 3.24, 3.28, 3.32, 3.36, 3.40, 3.44, 3.48, 3.52, 3.56, 3.60, 3.64, 3.68, 3.72, 3.76, 3.80, 3.84, 3.88, 3.92, 3.96, 4.00, 4.04, 4.08, 4.12, 4.16, 4.20, 4.24, 4.28, 4.32, 4.36, 4.40, 4.44, 4.48, 4.52, 4.56, 4.60, 4.64, 4.68, 4.72, 4.76, 4.80, 4.84, 4.88, 4.92, 4.96, 5.00, 5.04, 5.08, 5.12, 5.16, 5.20, 5.24, 5.28, 5.32, 5.36, 5.40, 5.44, 5.48, 5.52, 5.56, 5.60, 5.64, 5.68, 5.72, 5.76, 5.80, 5.84, 5.88, 5.92, 5.96, 6.00, 6.04, 6.08, 6.12, 6.16, 6.20, 6.24, 6.28, 6.32, 6.36, 6.40, 6.44, 6.48, 6.52, 6.56, 6.60, 6.64, 6.68, 6.72, 6.76, 6.80, 6.84, 6.88, 6.92, 6.96, 7.00, 7.04, 7.08, 7.12, 7.16, 7.20, 7.24, 7.28, 7.32, 7.36, 7.40, 7.44, 7.48, 7.52, 7.56, 7.60, 7.64, 7.68, 7.72, 7.76, 7.80, 7.84, 7.88, 7.92, 7.96, 8.00, 8.04, 8.08, 8.12, 8.16, 8.20, 8.24, 8.28, 8.32, 8.36, 8.40, 8.44, 8.48, 8.52, 8.56, 8.60, 8.64, 8.68, 8.72, 8.76, 8.80, 8.84, 8.88, 8.92, 8.96, 9.00, 9.04, 9.08, 9.12, 9.16, 9.20, 9.24, 9.28, 9.32, 9.36, 9.40, 9.44, 9.48, 9.52, 9.56, 9.60, 9.64, 9.68, 9.72, 9.76, 9.80, 9.84, 9.88, 9.92, 9.96, 10.00.

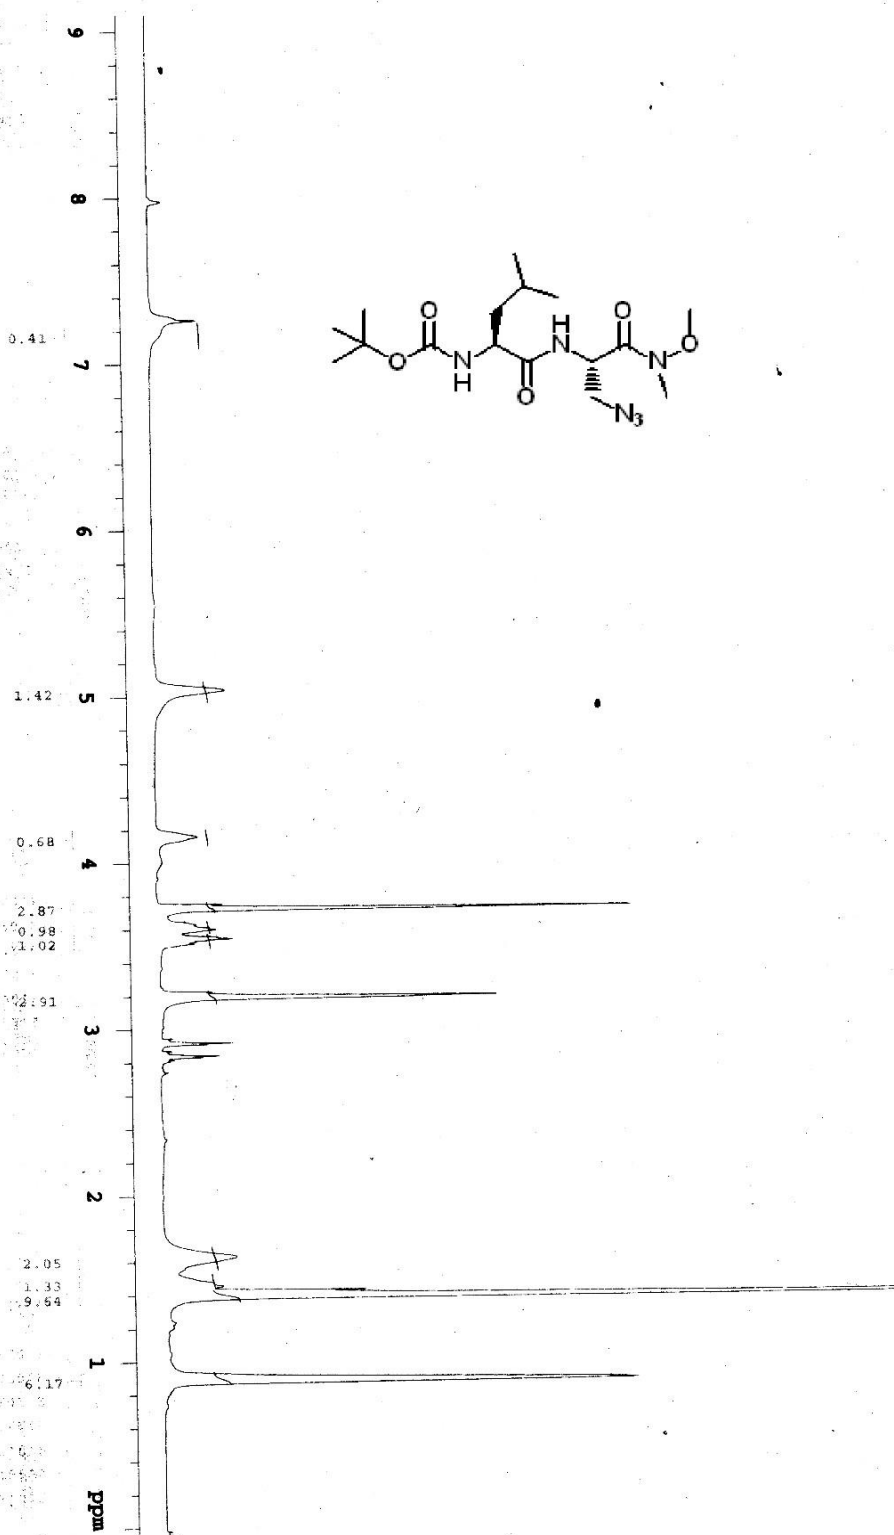

Figure S56. <sup>1</sup>H Spectra of synthesized compound 15.

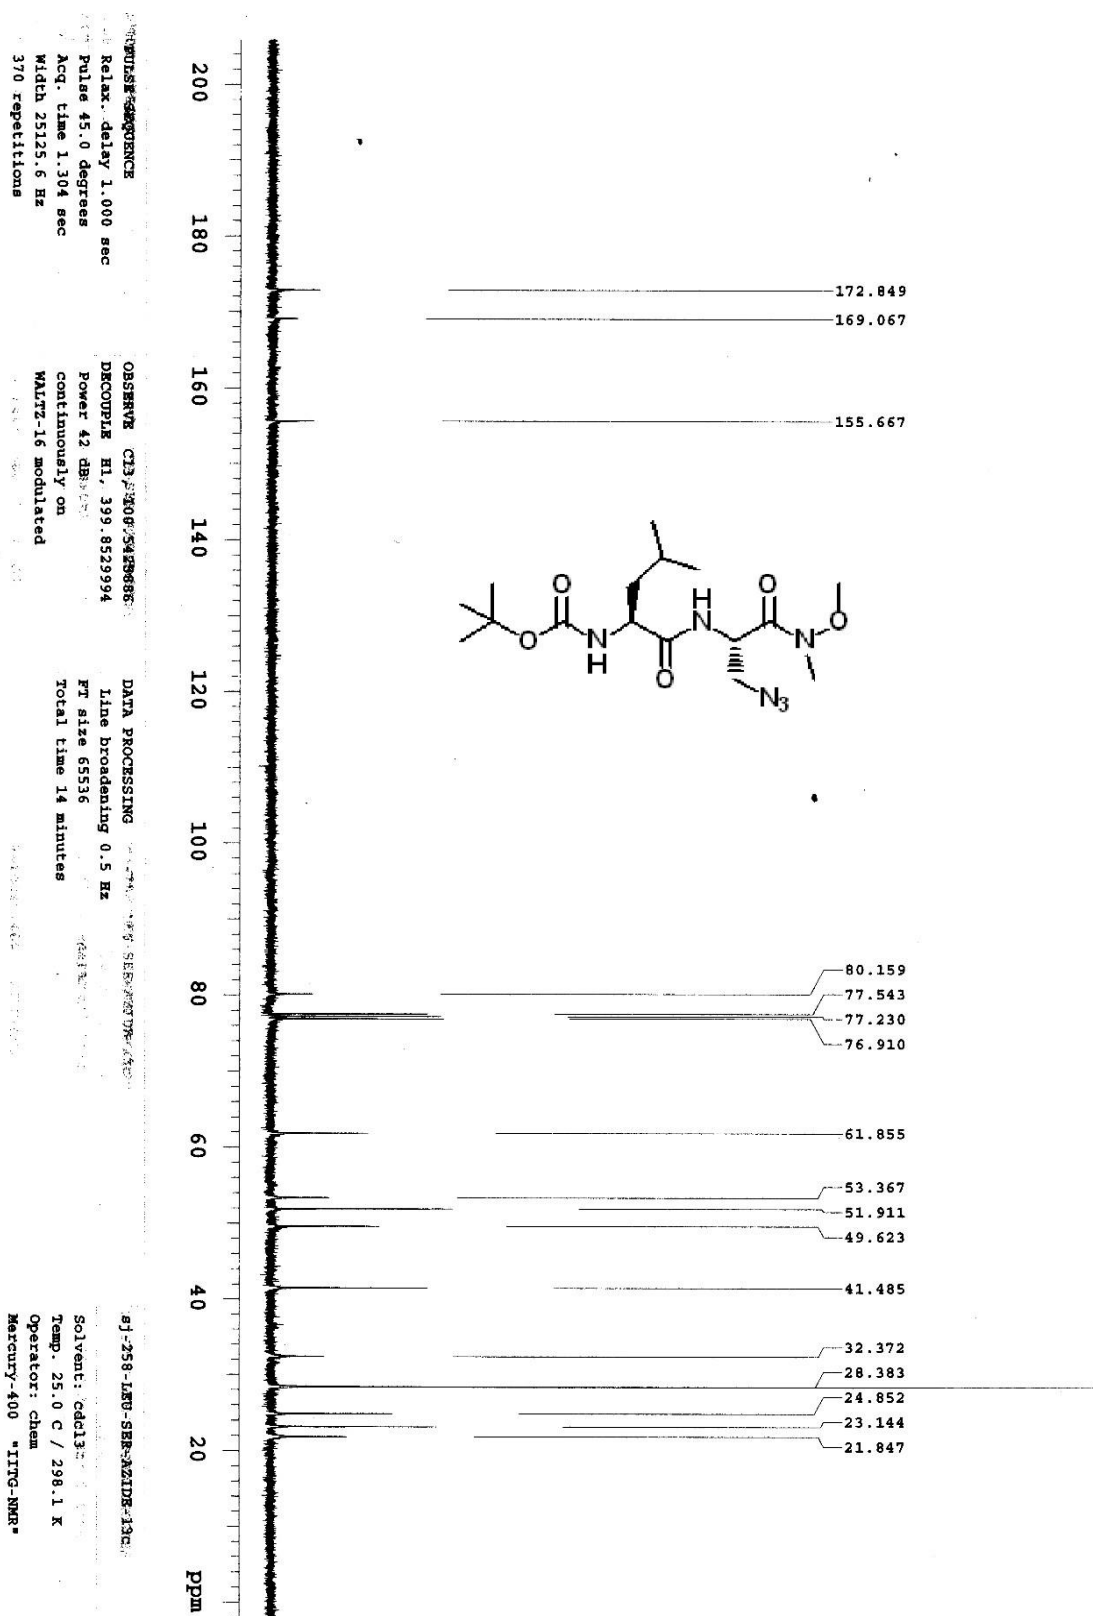

Figure S57. <sup>13</sup>C Spectra of synthesized compound 15.

SJ-298-1H

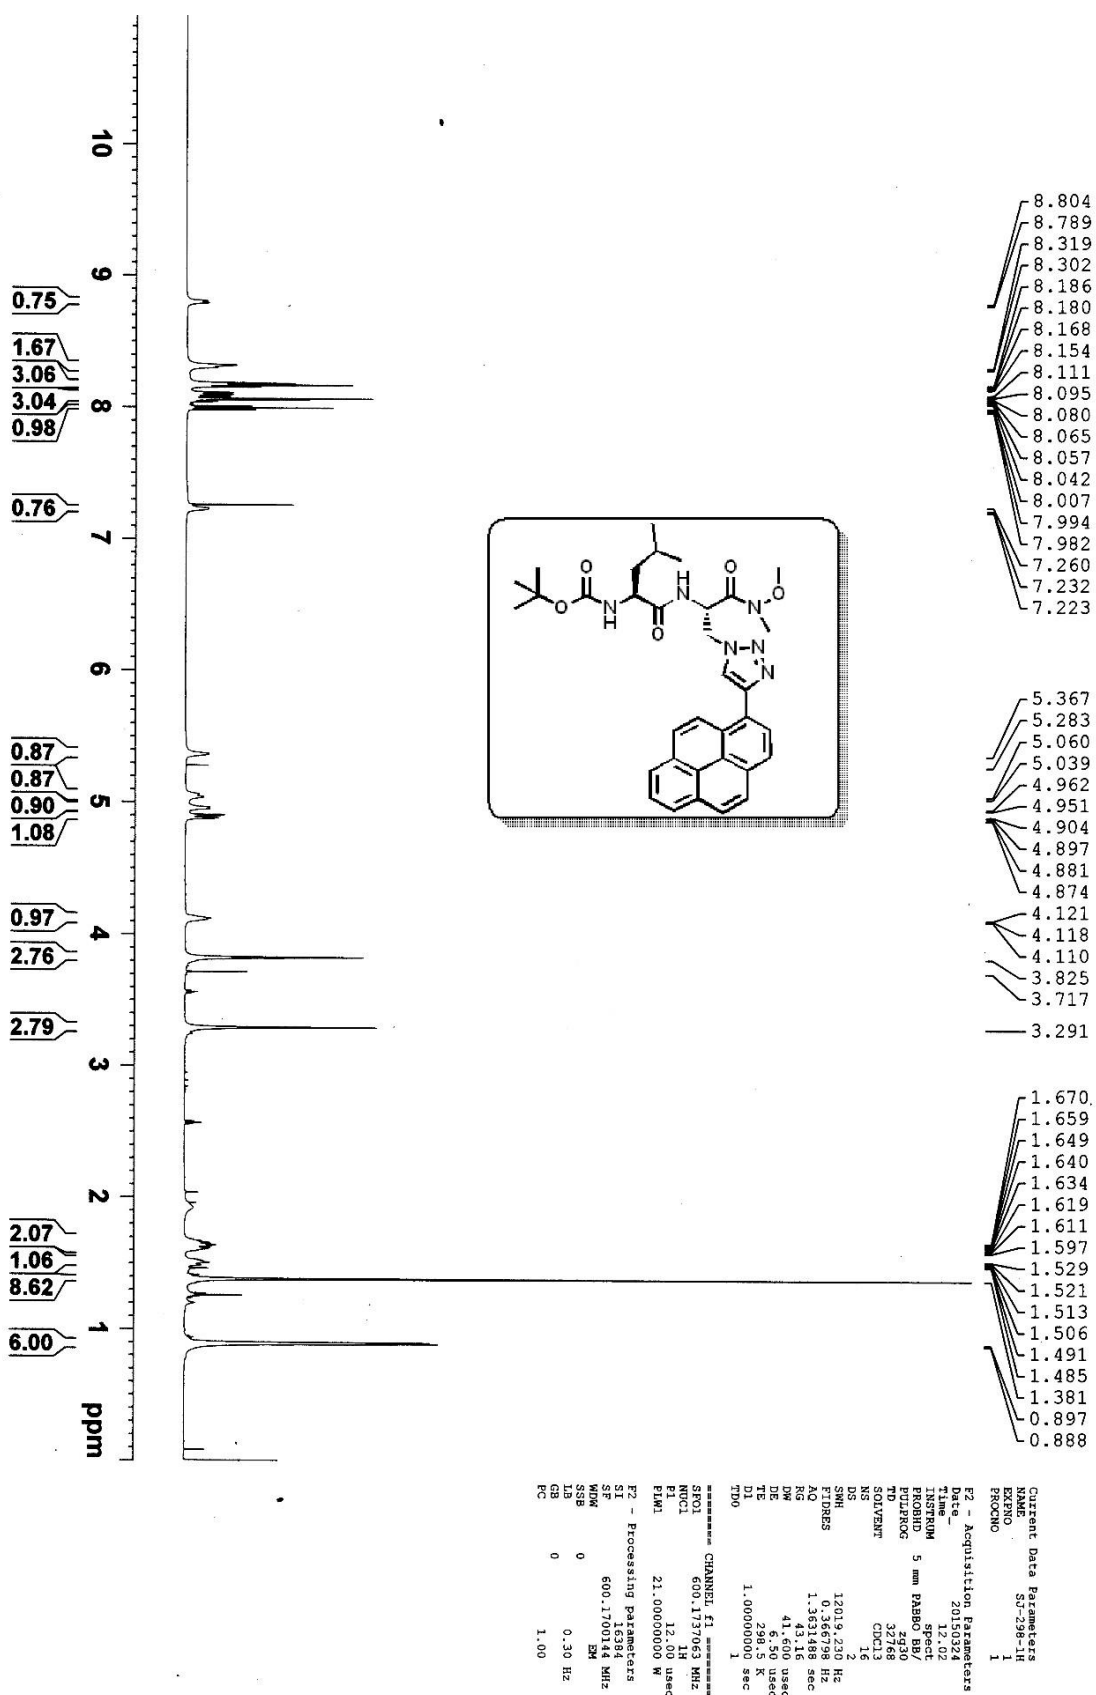

Figure S58. <sup>1</sup>H Spectra of synthesized compound 16.

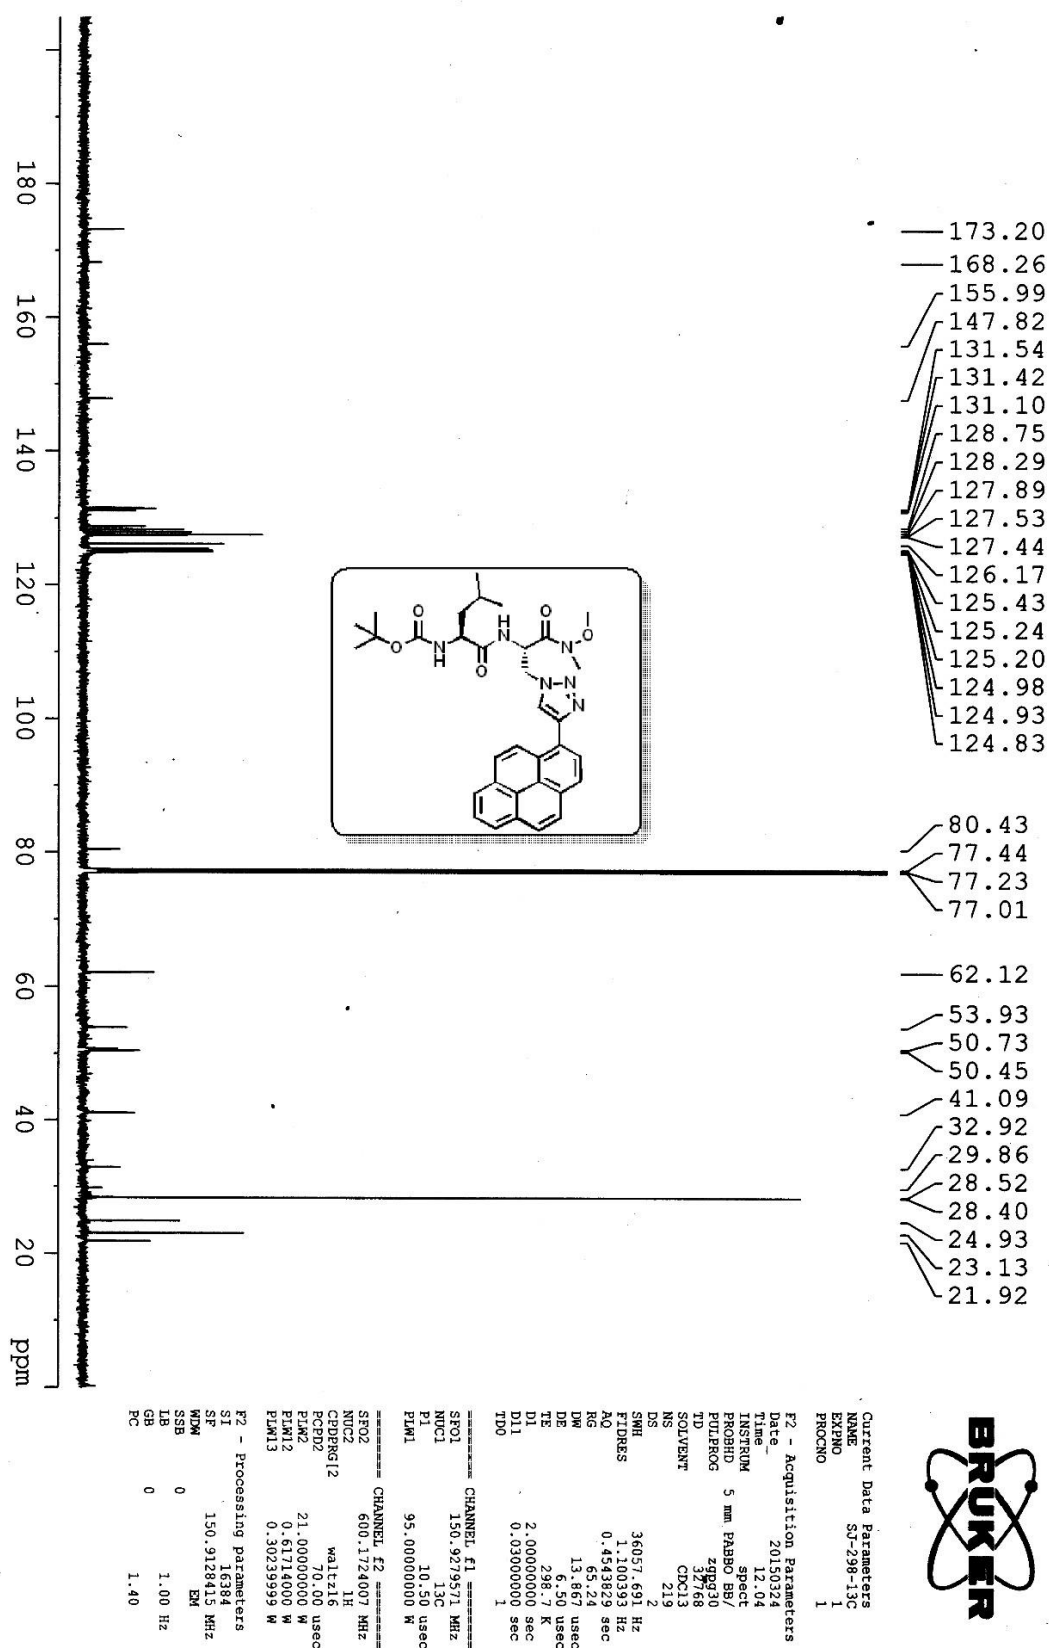

Figure S59. <sup>13</sup>C Spectra of synthesized compound 16.

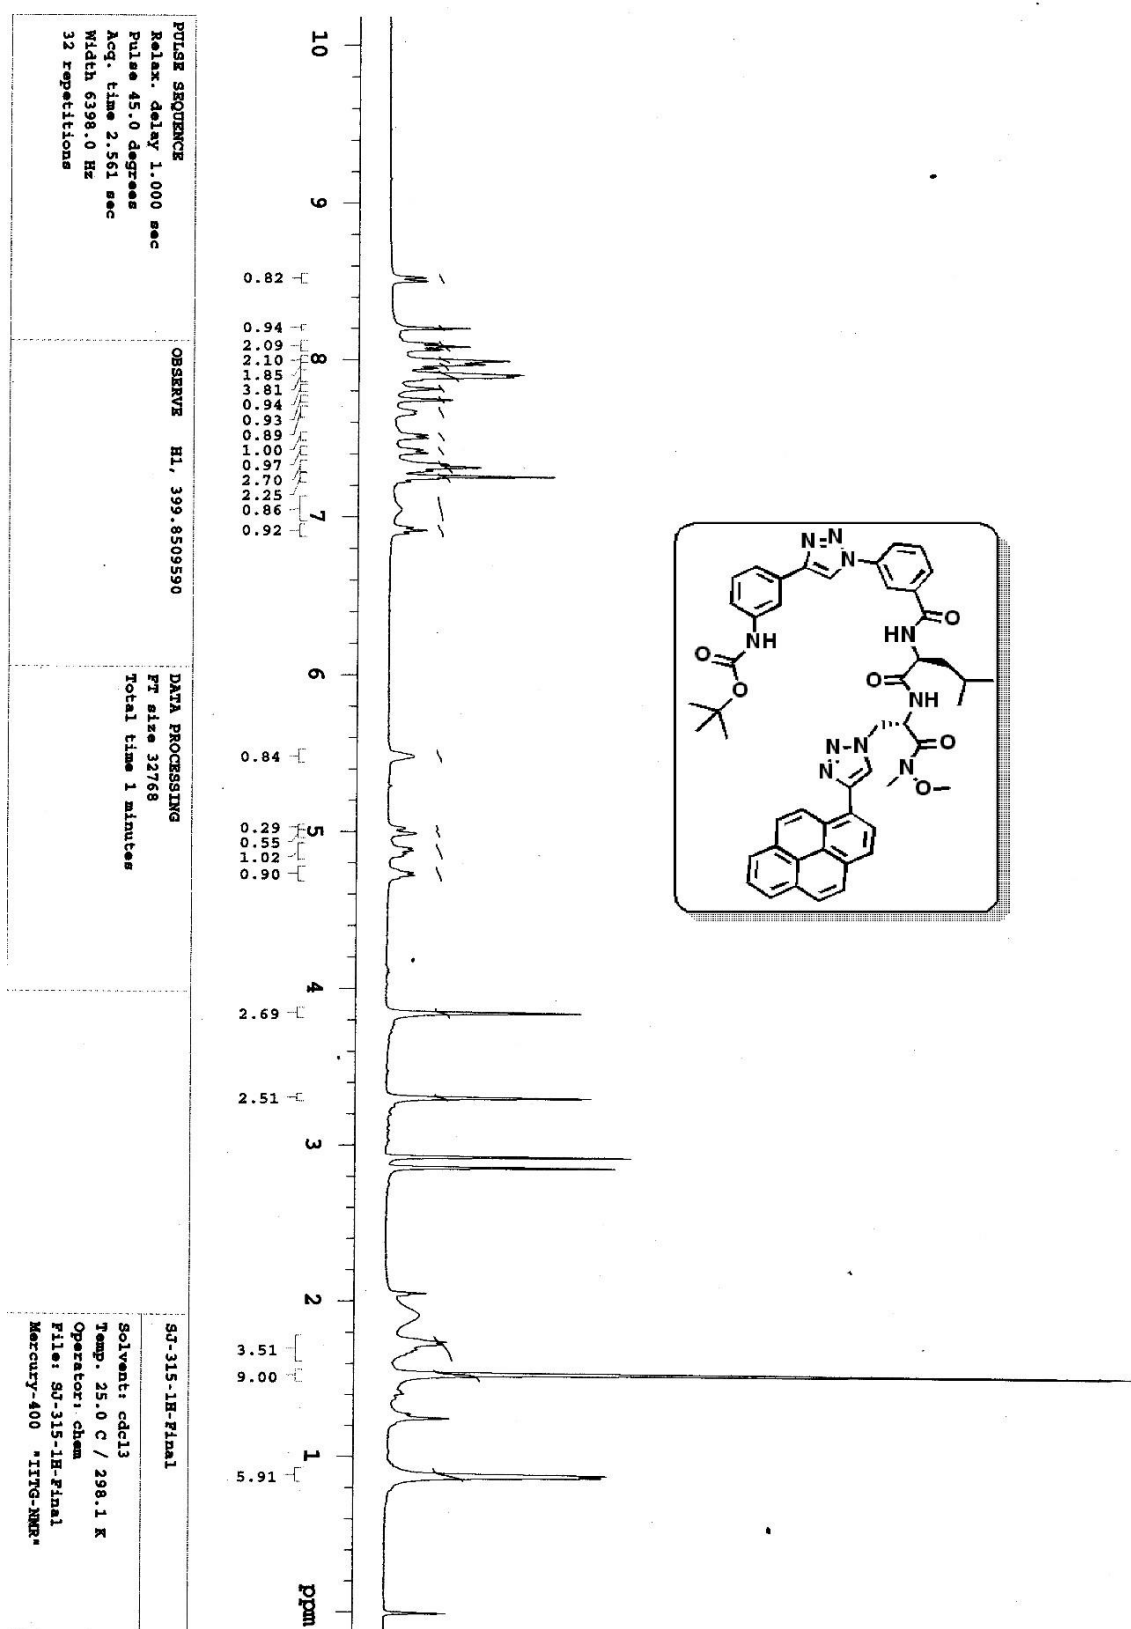

Figure S60.  $^1\text{H}$  Spectra of synthesized compound 18.



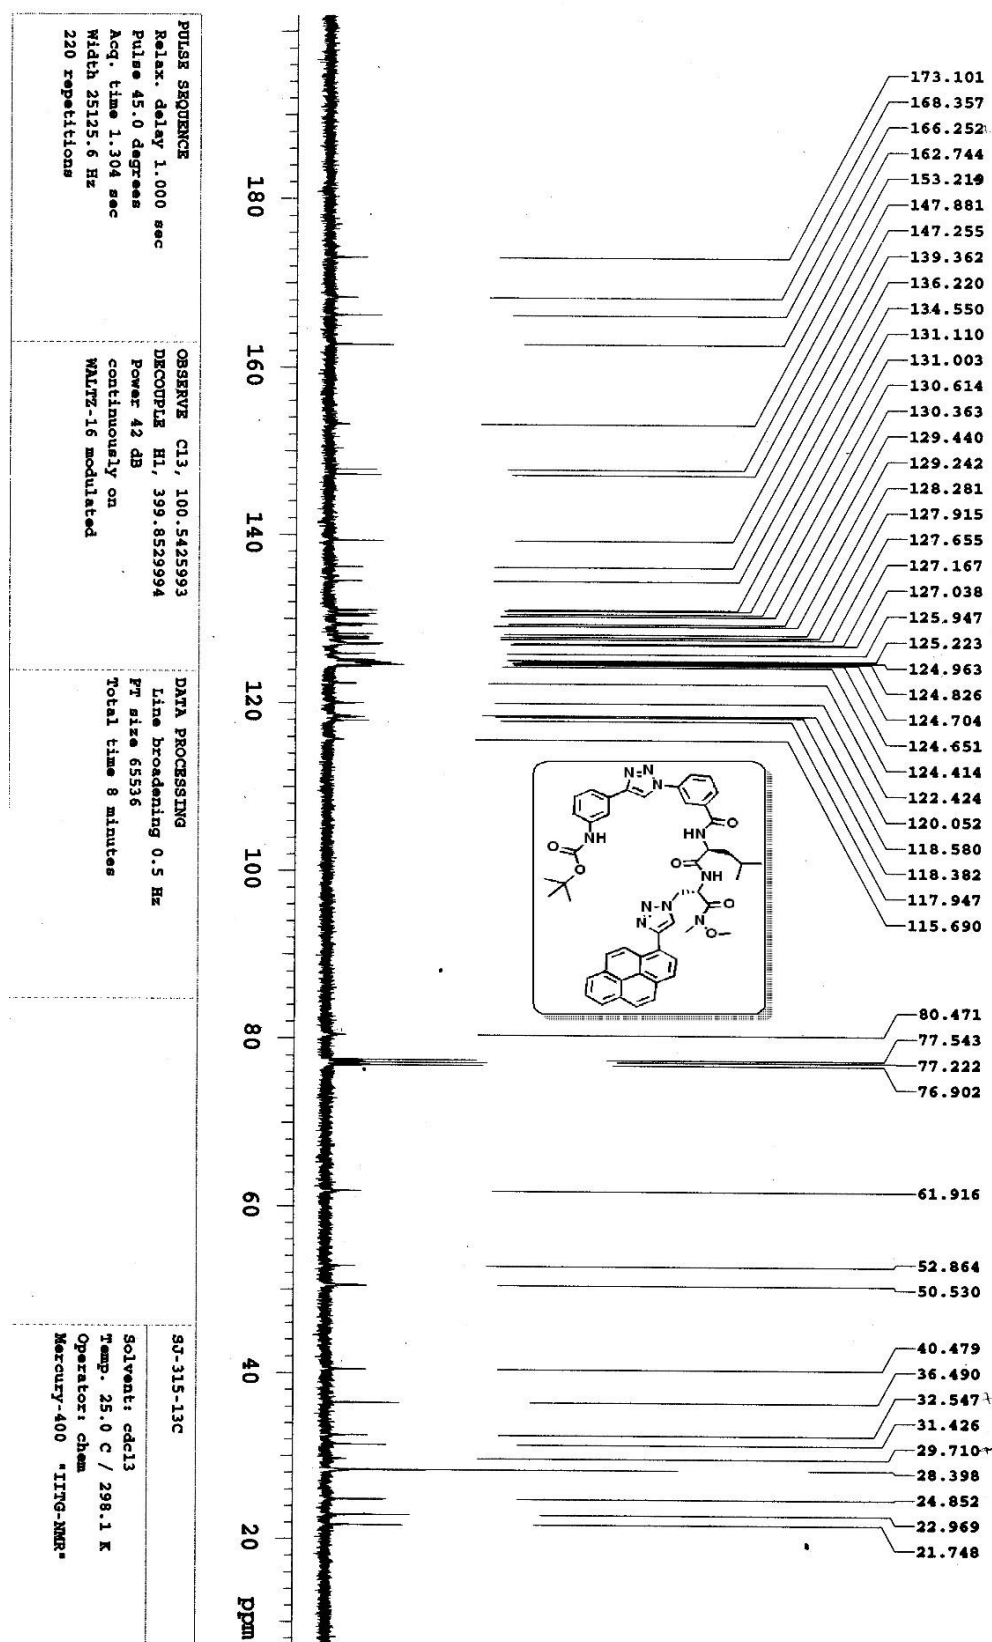

Figure S61.  $^{13}\text{C}$  Spectra of synthesized compound 18.



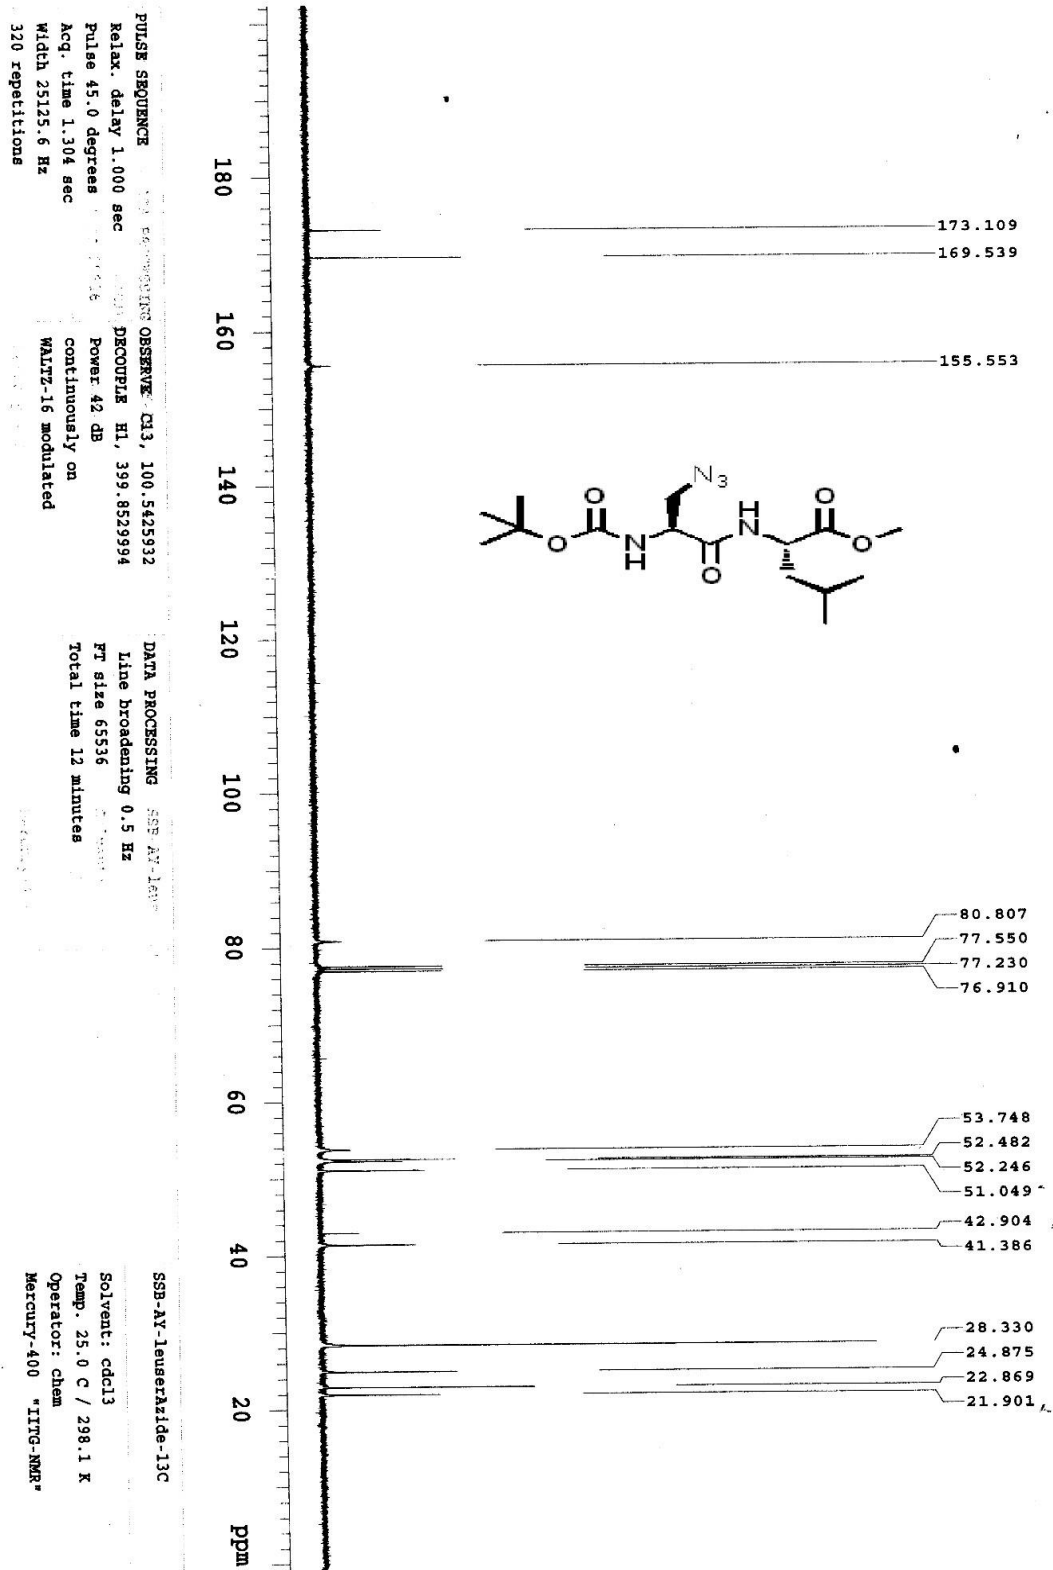

Figure S63.  $^{13}\text{C}$  Spectra of synthesized compound 23.

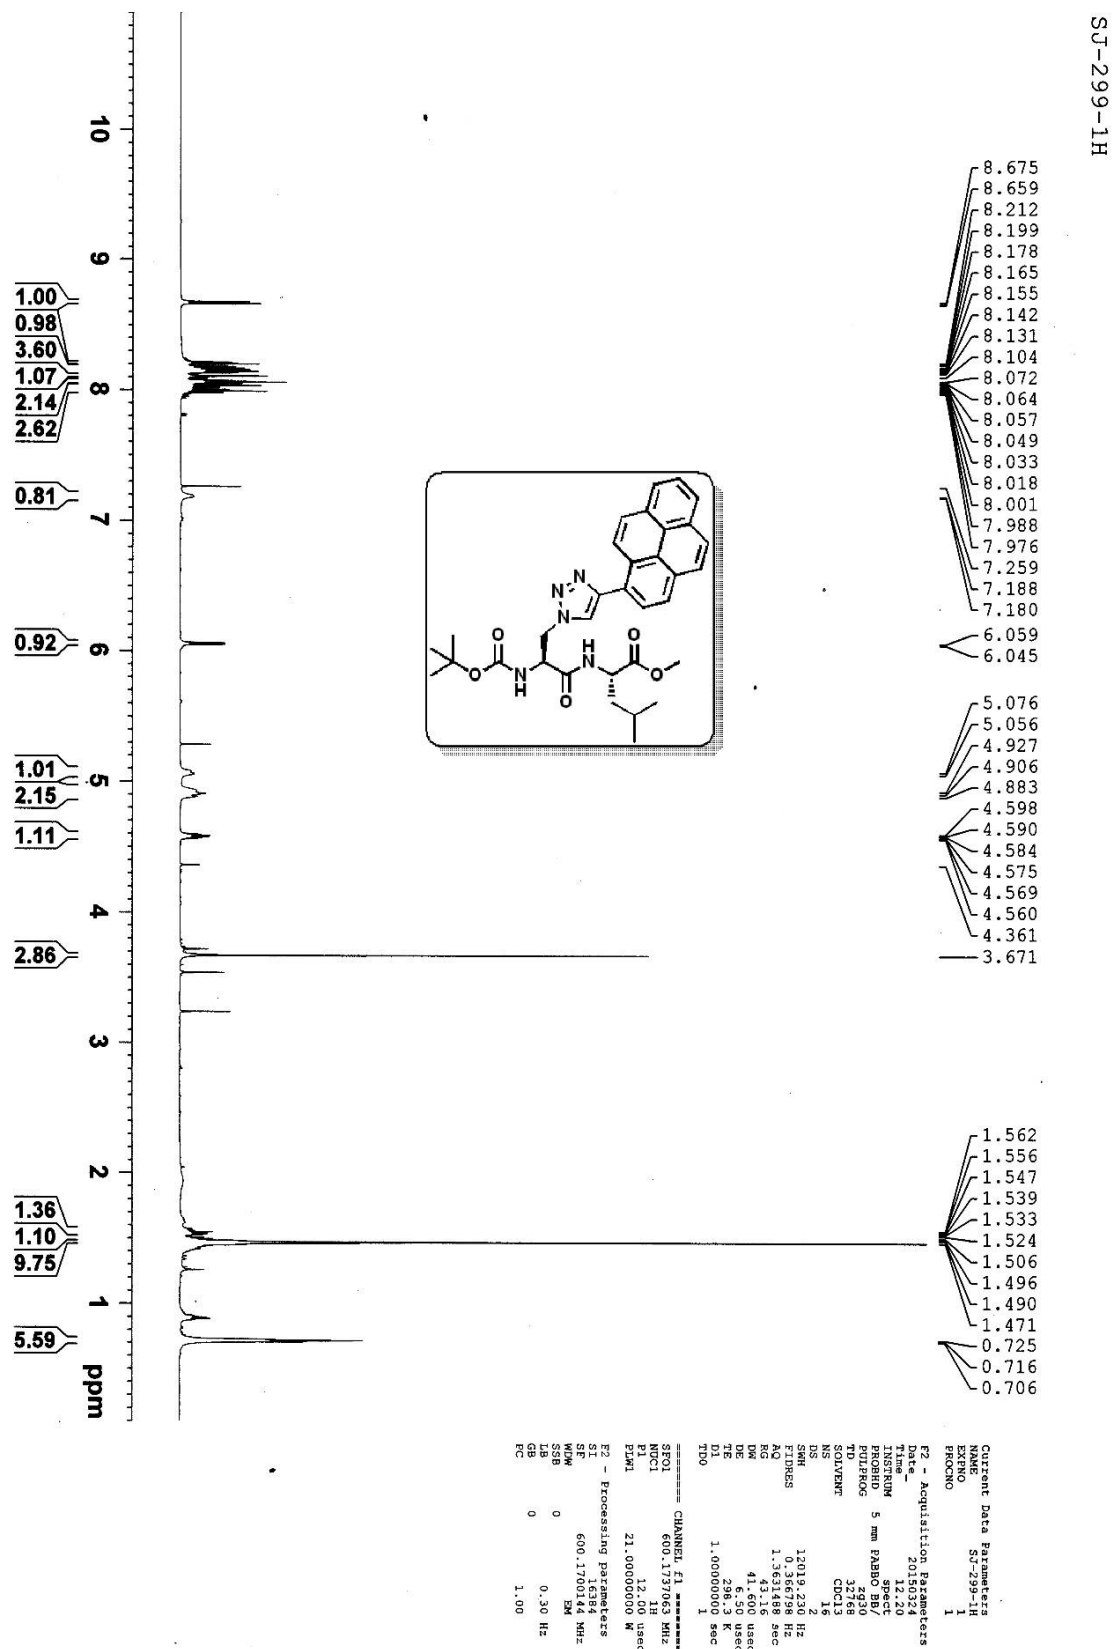

Figure S64.  $^1\text{H}$  Spectra of synthesized compound **24**.

SJ-299-13C

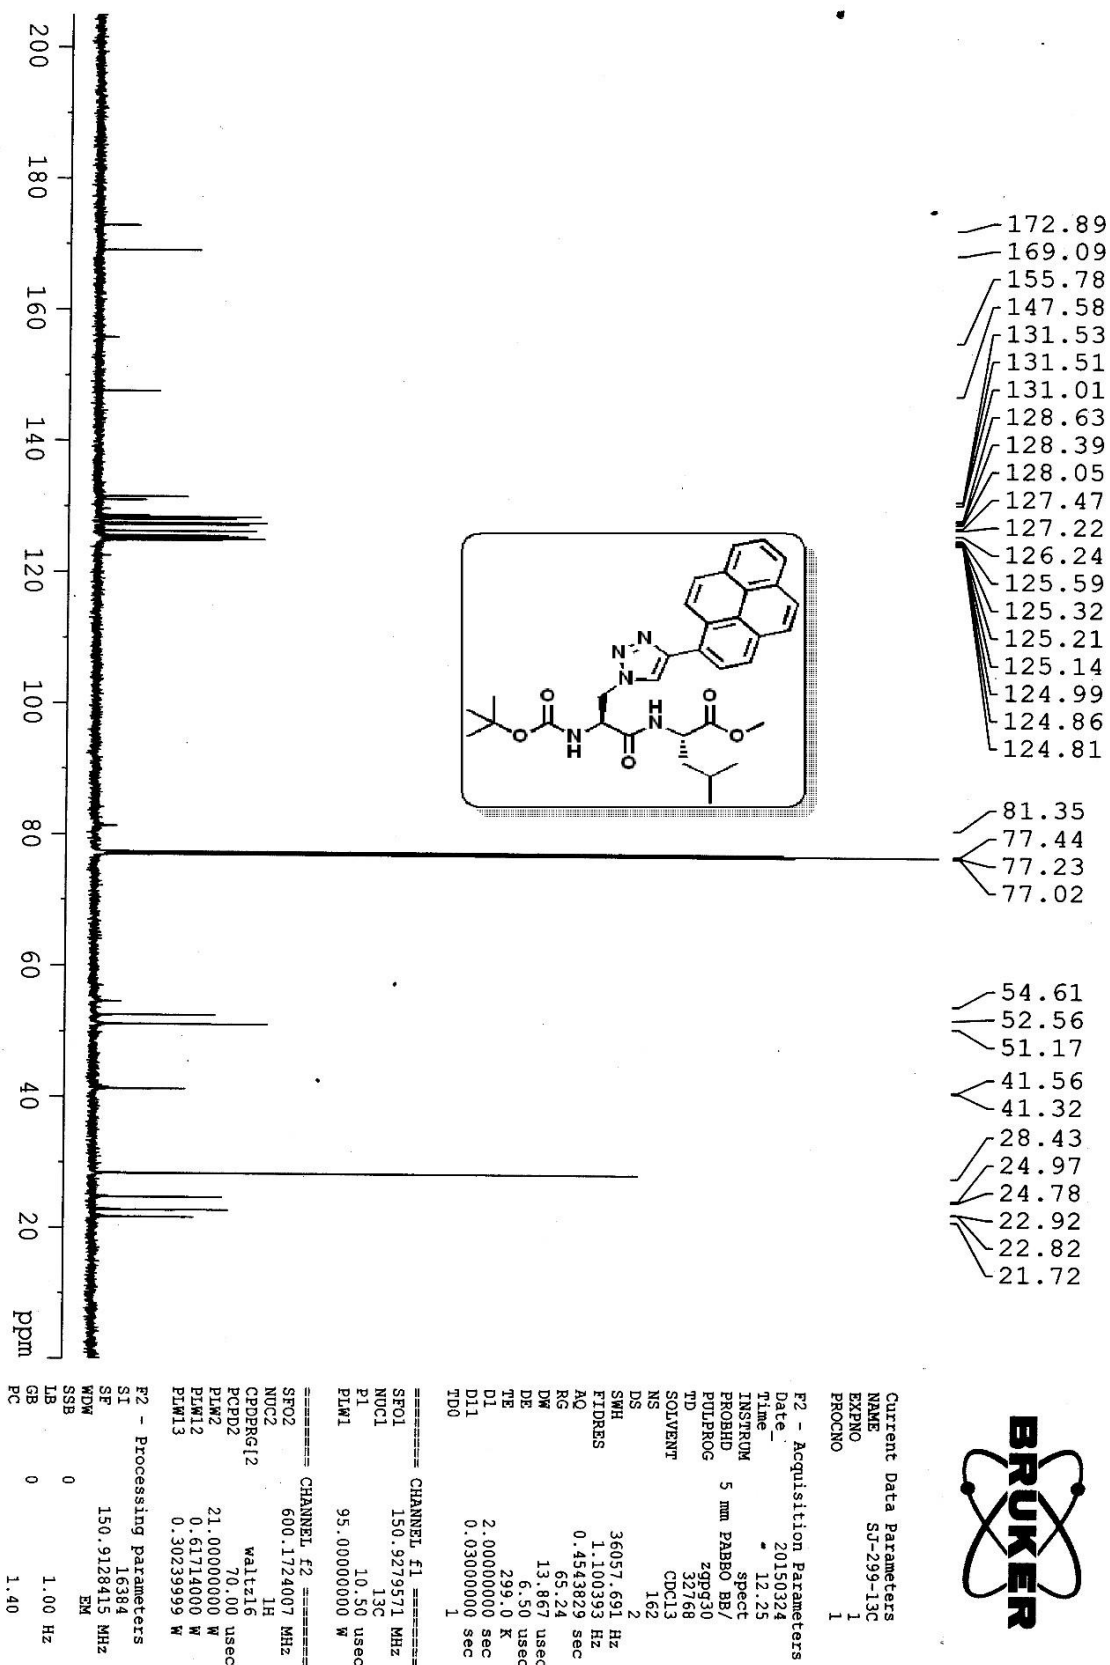

Figure S65. <sup>13</sup>C Spectra of synthesized compound 24.

6.6.8.0 (8.1)

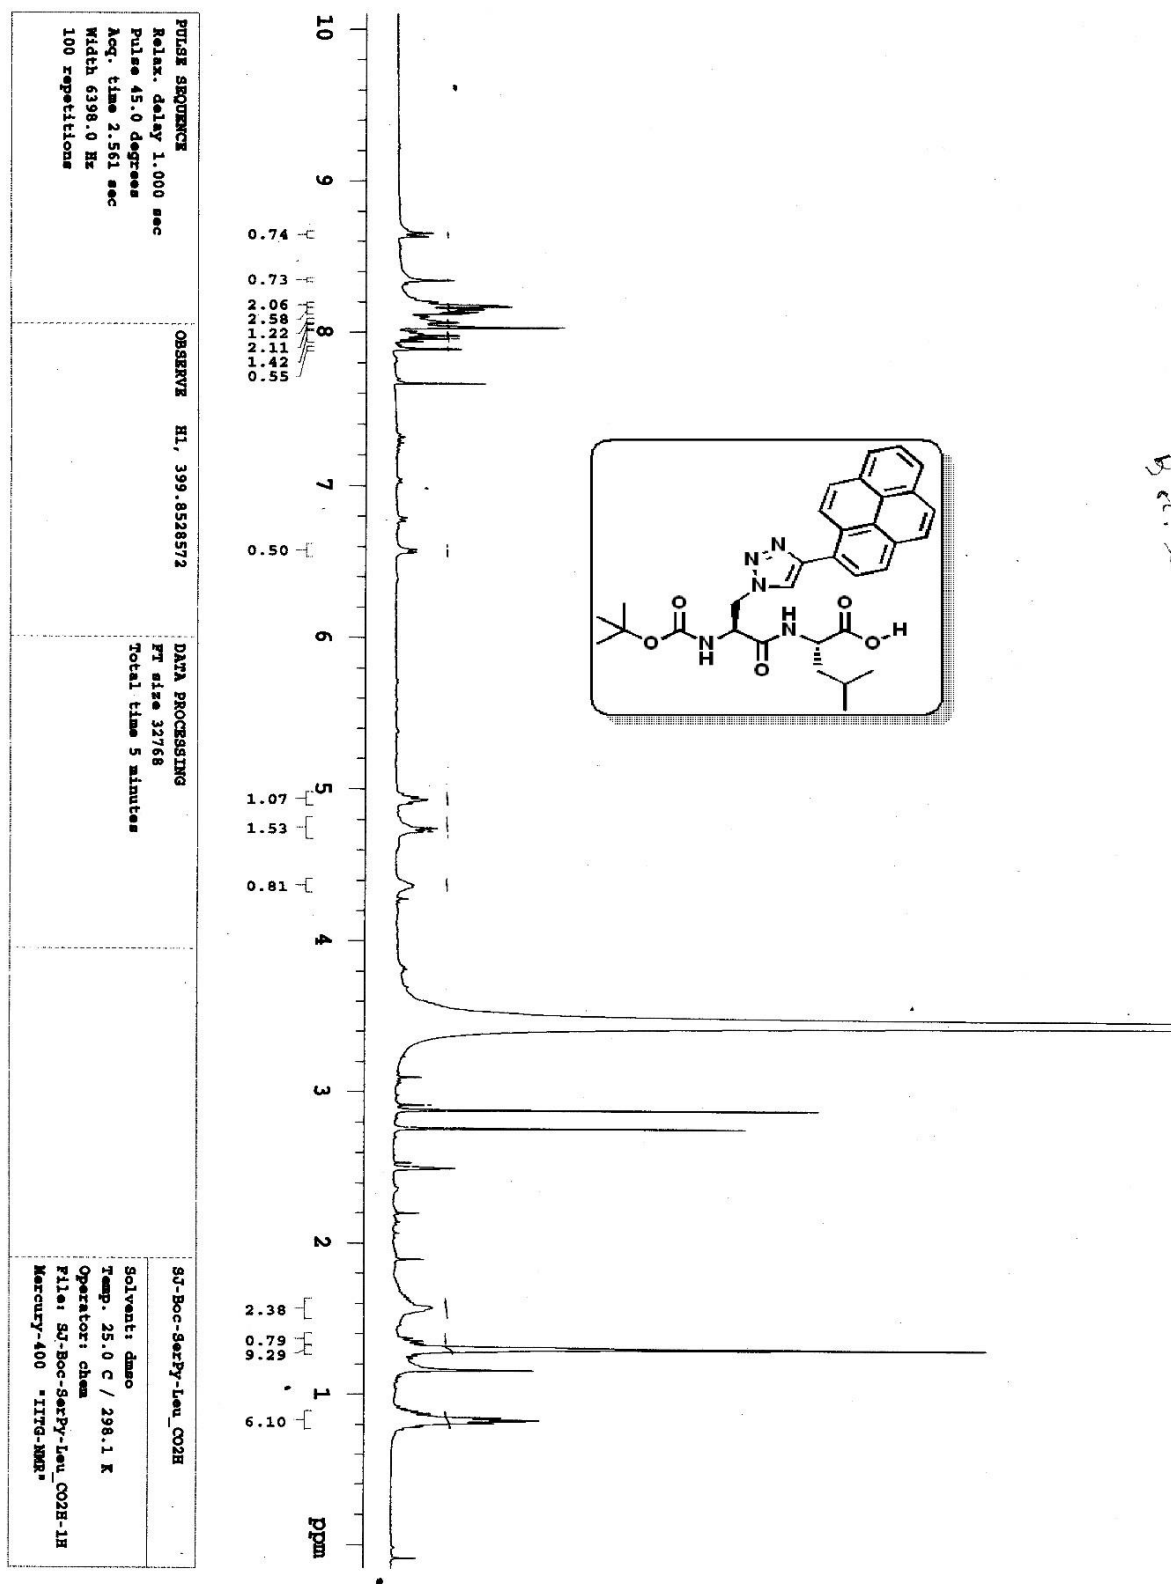

Figure S66. <sup>1</sup>H Spectra of synthesized compound 25.

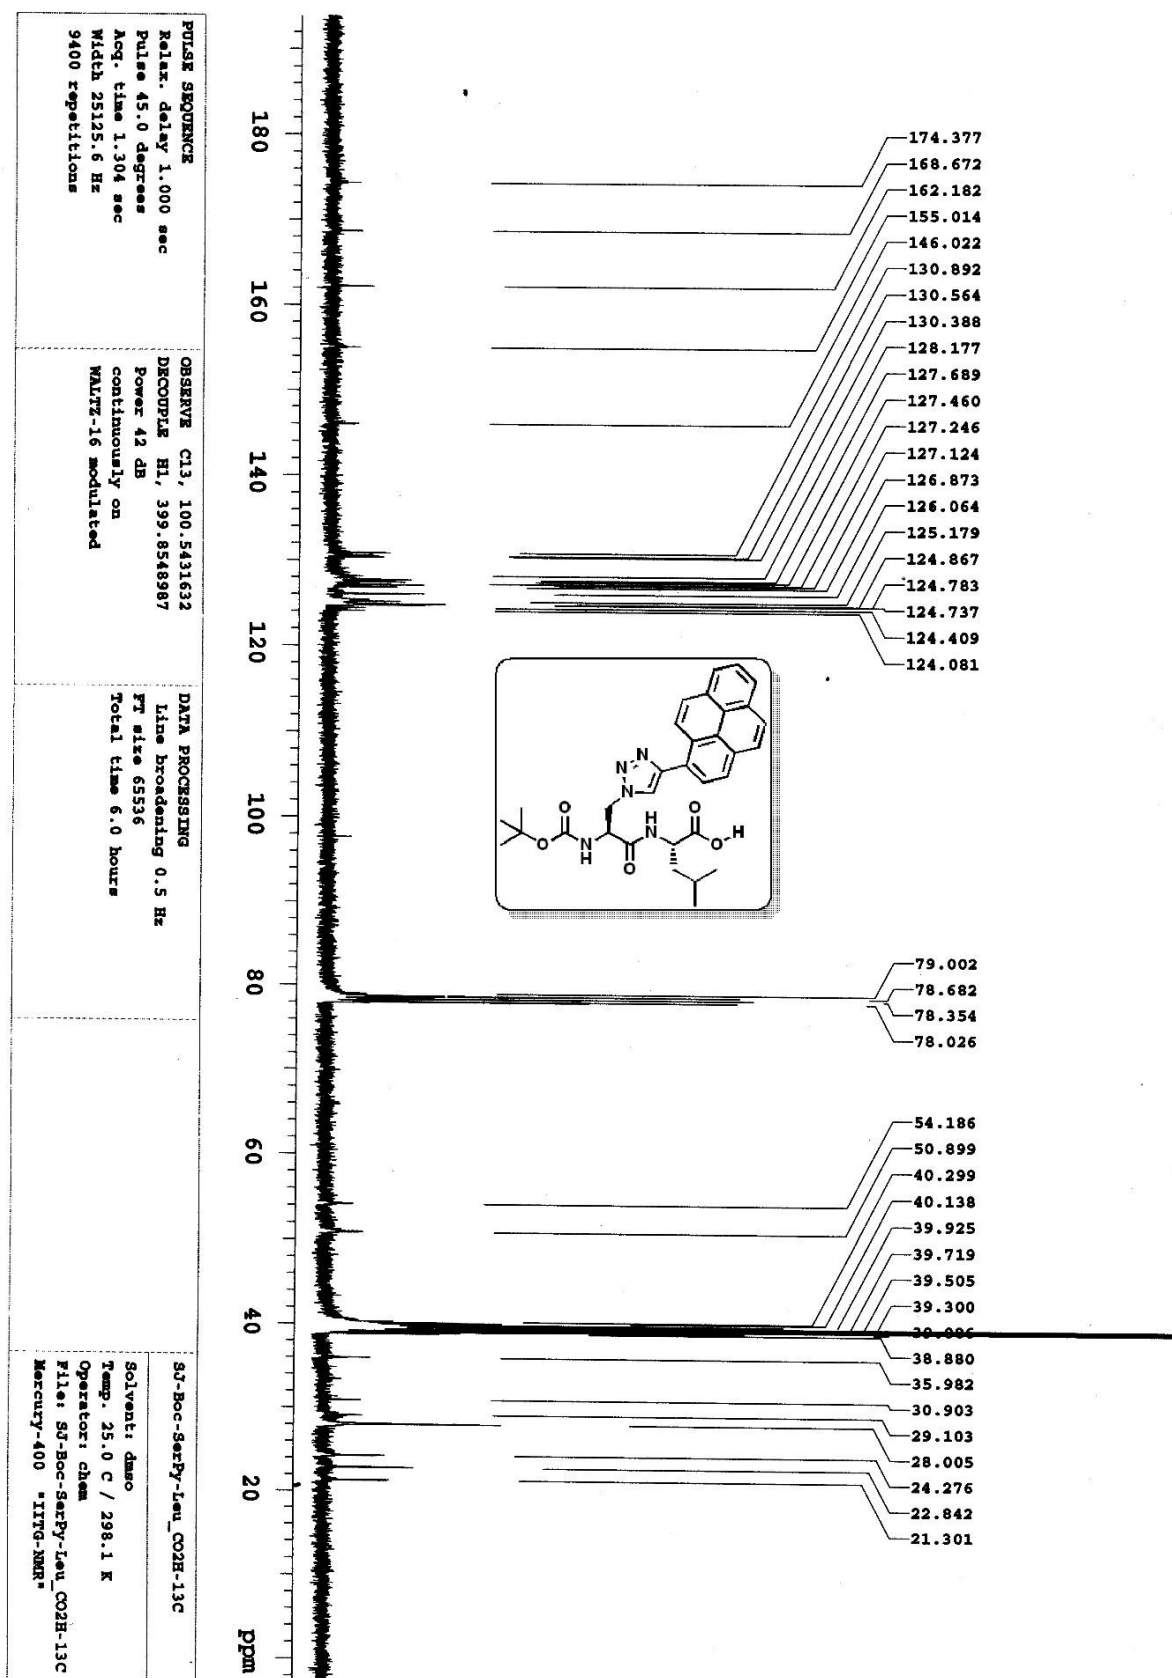

Figure S67.  $^{13}\text{C}$  Spectra of synthesized compound 25.

Figure 1 is a vertical line graph showing the distribution of 1000 random numbers. The y-axis is labeled "NUMBER OF RANDOM NUMBERS" and ranges from 0 to 10.297. The x-axis is labeled "RANDOM NUMBER" and ranges from 0.838 to 1.718. The graph displays a series of vertical bars of varying heights, representing the frequency of random numbers. The distribution is skewed to the right, with the highest frequency (10.297) occurring at the lowest random number value (0.838). The bars are labeled with their corresponding random number values on the x-axis.

| Random Number | Number of Random Numbers |
|---------------|--------------------------|
| 10.297        | 10.297                   |
| 9.103         | 9.103                    |
| 8.824         | 8.824                    |
| 8.808         | 8.808                    |
| 8.760         | 8.760                    |
| 8.744         | 8.744                    |
| 8.734         | 8.734                    |
| 8.722         | 8.722                    |
| 8.682         | 8.682                    |
| 8.650         | 8.650                    |
| 8.347         | 8.347                    |
| 8.312         | 8.312                    |
| 8.294         | 8.294                    |
| 8.281         | 8.281                    |
| 8.267         | 8.267                    |
| 8.257         | 8.257                    |
| 8.250         | 8.250                    |
| 8.246         | 8.246                    |
| 8.232         | 8.232                    |
| 8.221         | 8.221                    |
| 8.209         | 8.209                    |
| 8.195         | 8.195                    |
| 8.186         | 8.186                    |
| 8.180         | 8.180                    |
| 8.171         | 8.171                    |
| 8.152         | 8.152                    |
| 8.141         | 8.141                    |
| 8.114         | 8.114                    |
| 8.099         | 8.099                    |
| 8.071         | 8.071                    |
| 8.058         | 8.058                    |
| 8.032         | 8.032                    |
| 8.020         | 8.020                    |
| 7.860         | 7.860                    |
| 7.847         | 7.847                    |
| 7.789         | 7.789                    |
| 7.777         | 7.777                    |
| 7.648         | 7.648                    |
| 7.635         | 7.635                    |
| 7.528         | 7.528                    |
| 7.515         | 7.515                    |
| 7.381         | 7.381                    |
| 7.352         | 7.352                    |
| 7.339         | 7.339                    |
| 7.274         | 7.274                    |
| 7.261         | 7.261                    |
| 4.941         | 4.941                    |
| 4.920         | 4.920                    |
| 4.913         | 4.913                    |
| 4.897         | 4.897                    |
| 4.776         | 4.776                    |
| 4.761         | 4.761                    |
| 4.754         | 4.754                    |
| 4.742         | 4.742                    |
| 3.792         | 3.792                    |
| 3.180         | 3.180                    |
| 2.500         | 2.500                    |
| 1.718         | 1.718                    |
| 1.694         | 1.694                    |
| 1.672         | 1.672                    |
| 1.590         | 1.590                    |
| 1.313         | 1.313                    |
| 0.938         | 0.938                    |
| 0.926         | 0.926                    |
| 0.921         | 0.921                    |
| 0.910         | 0.910                    |
| 0.838         | 0.838                    |

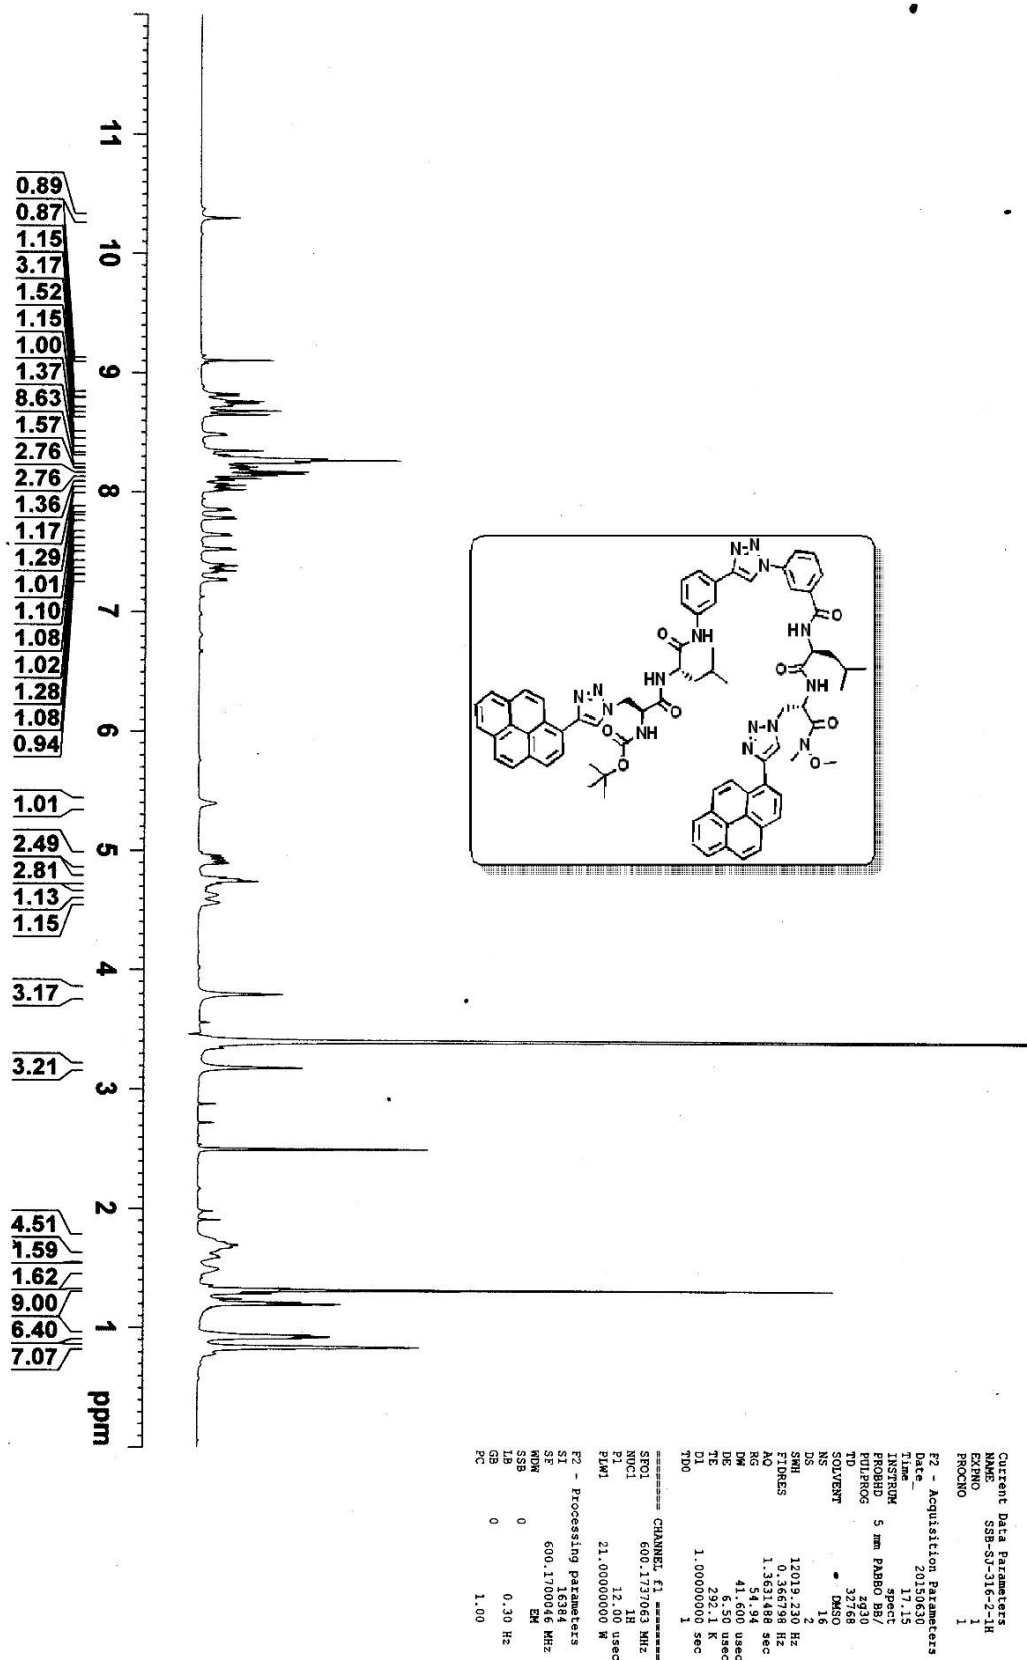

84



SJ-316\_13C

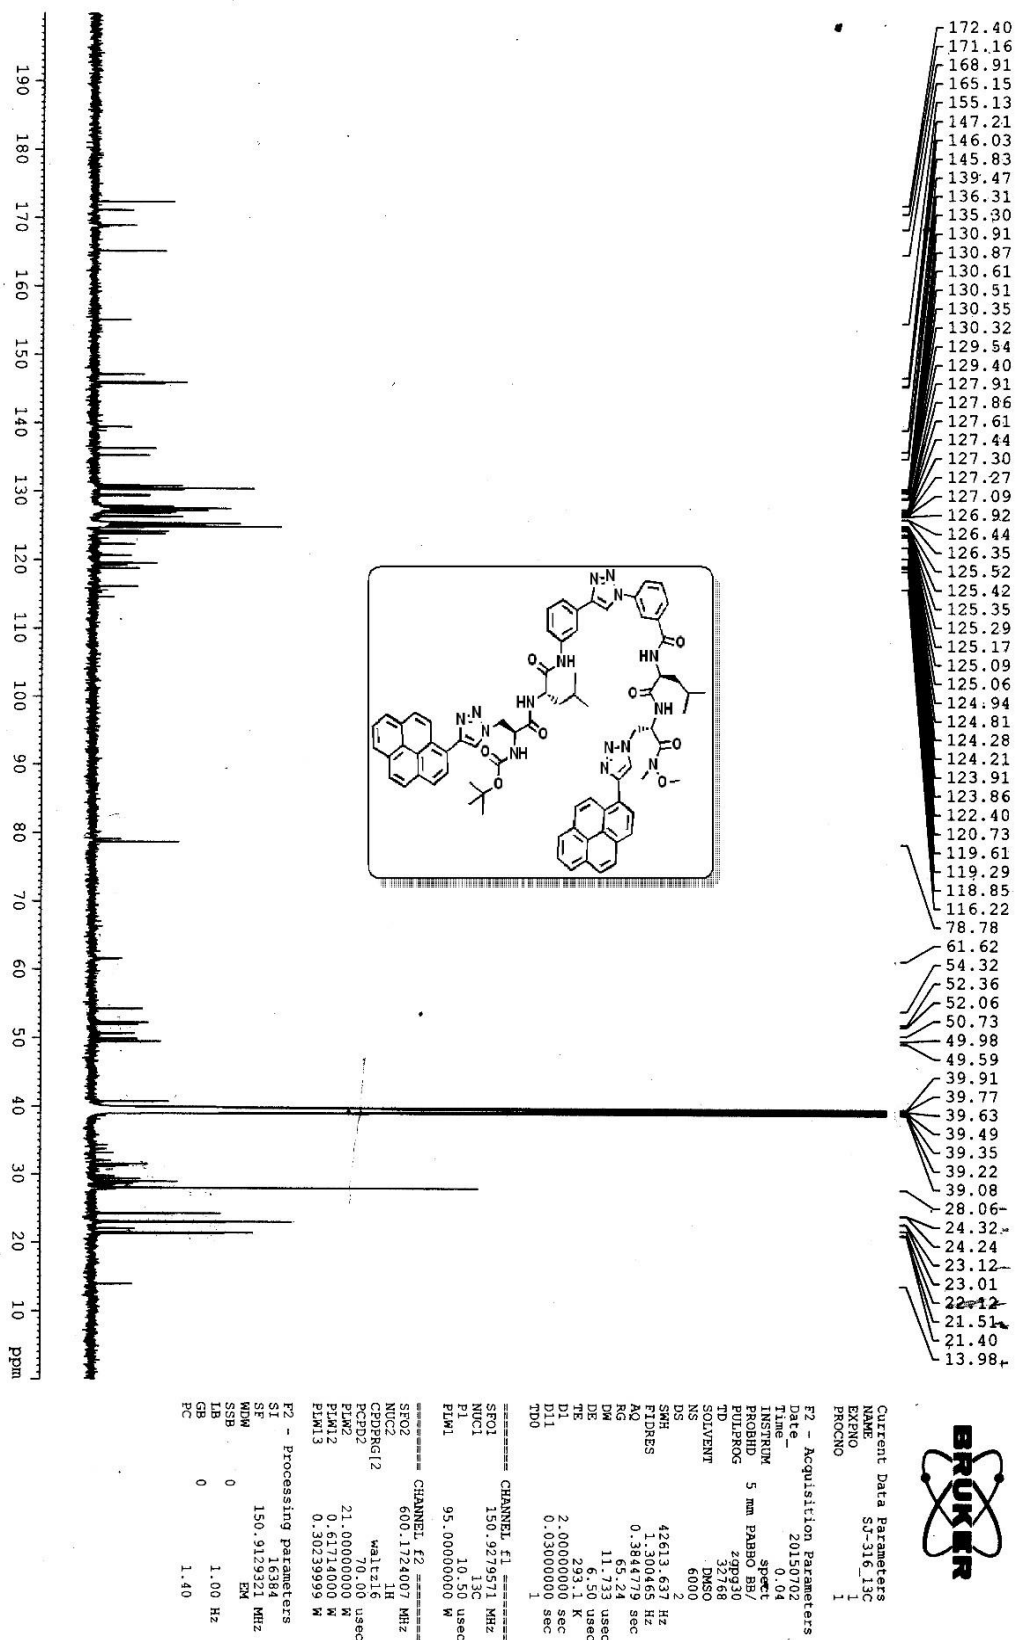

Figure S69. <sup>13</sup>C Spectra of synthesized compound 2.

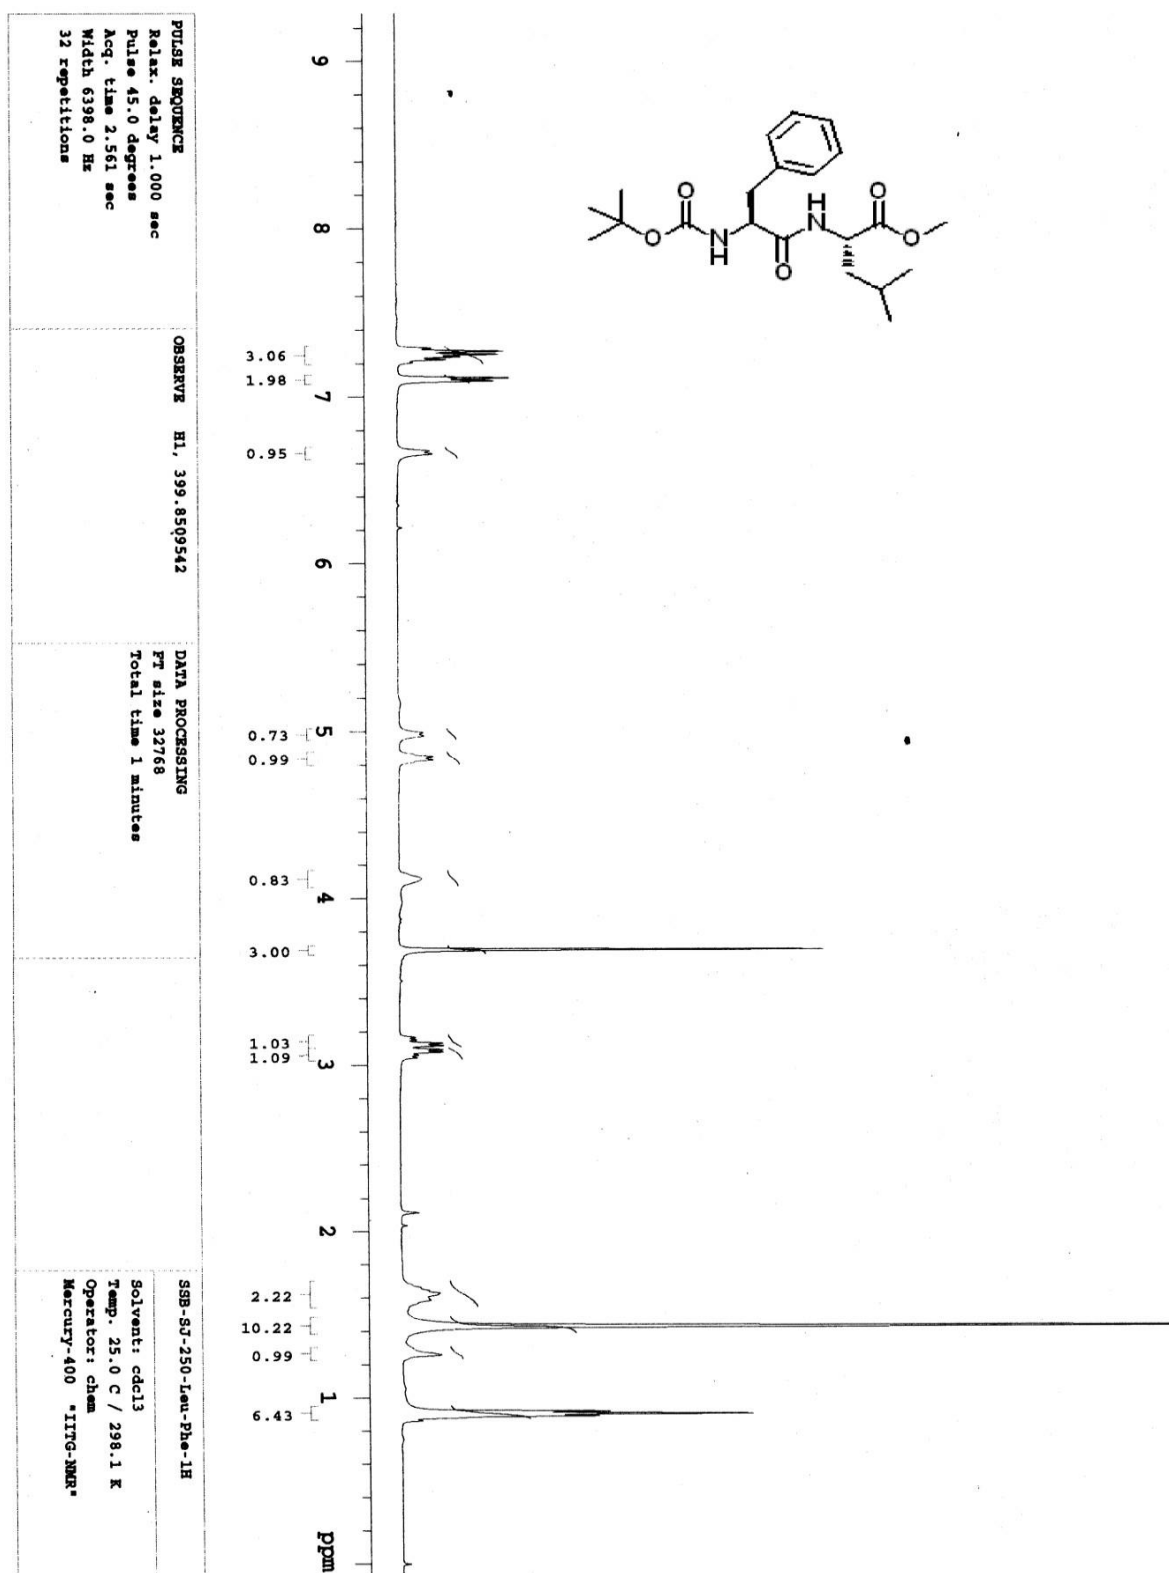

Figure S70.  $^1\text{H}$  Spectra of synthesized compound 27.

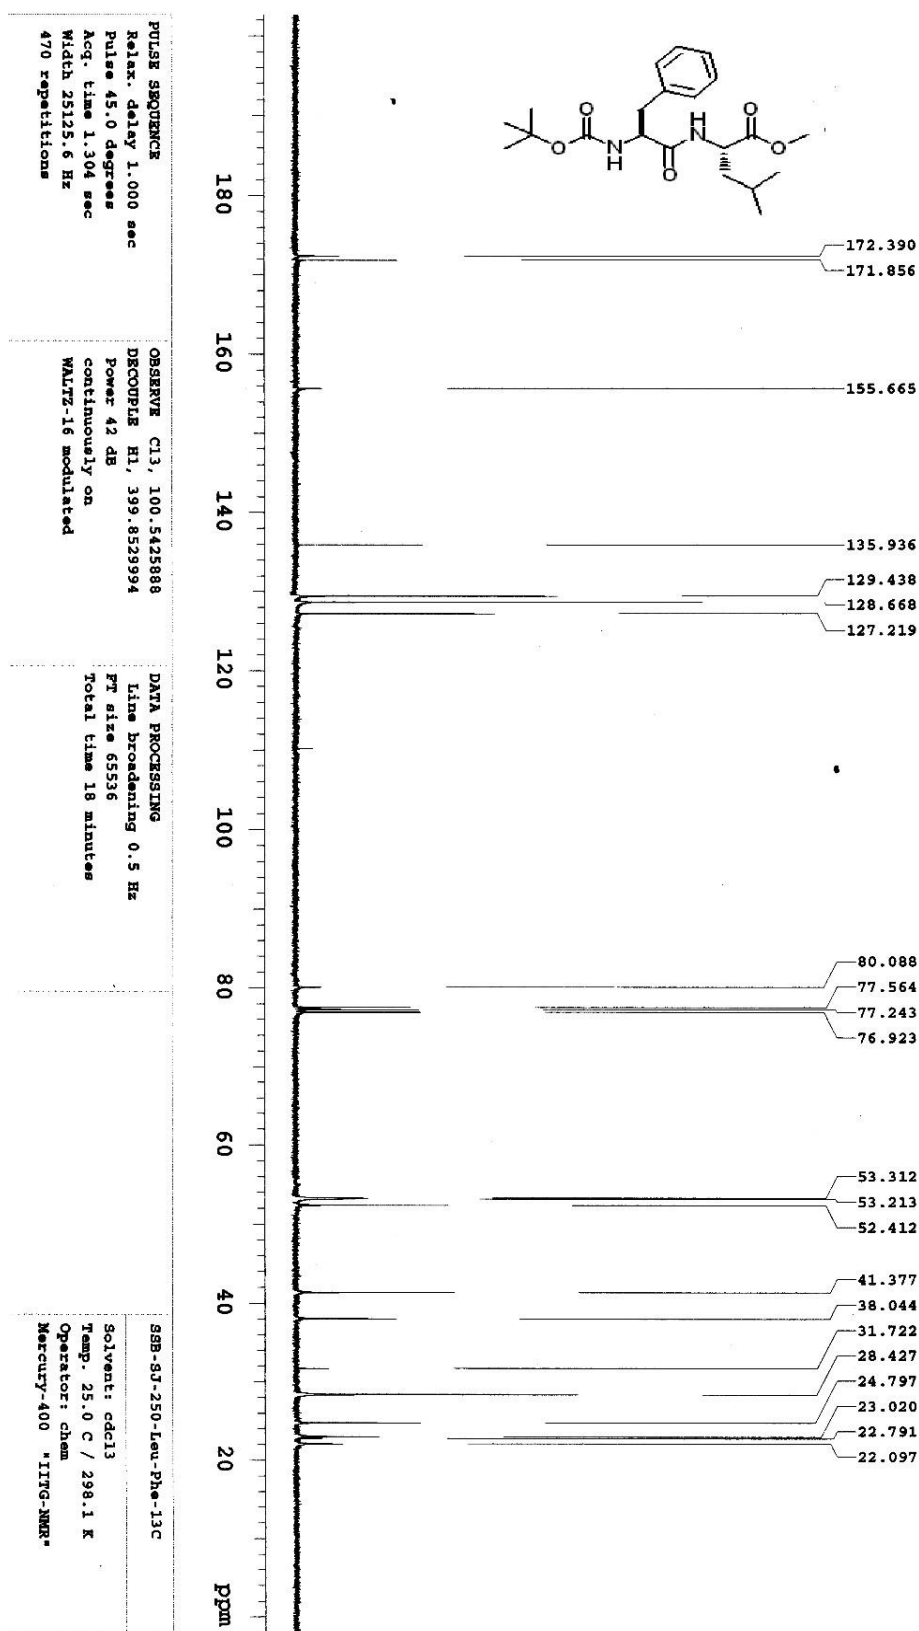

Figure S71.  $^{13}\text{C}$  Spectra of synthesized compound 27.

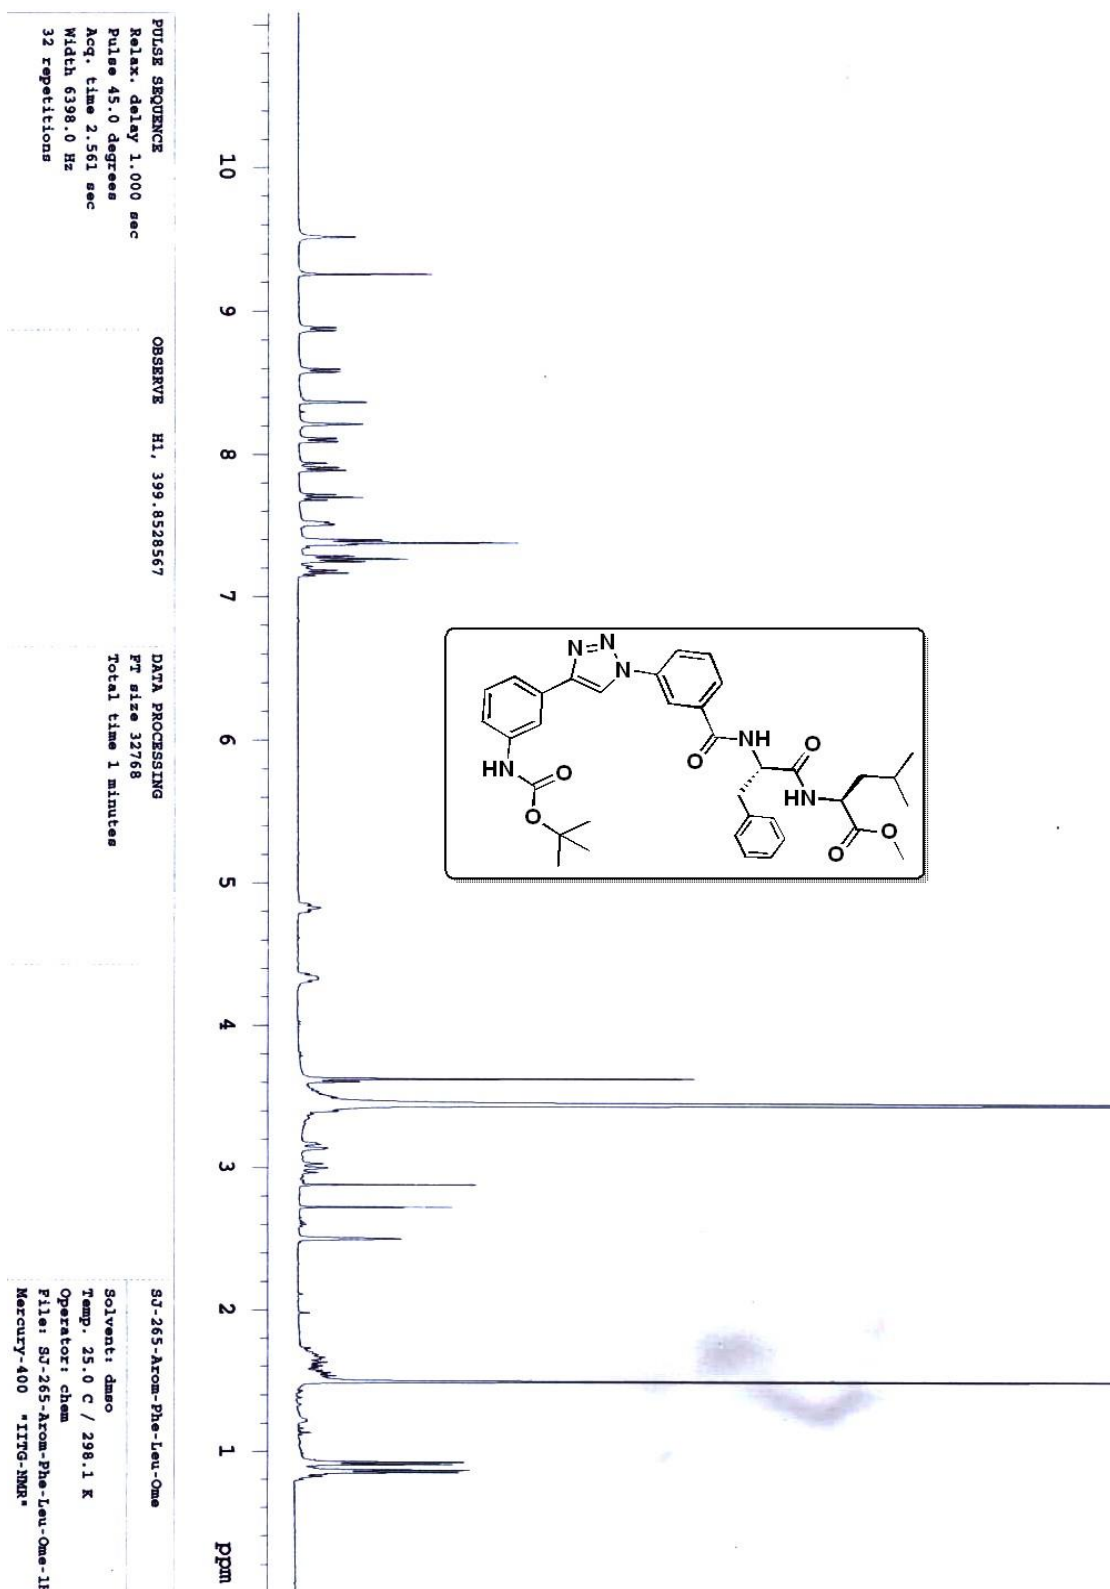

Figure S72.  $^1\text{H}$  Spectra of synthesized compound 29.

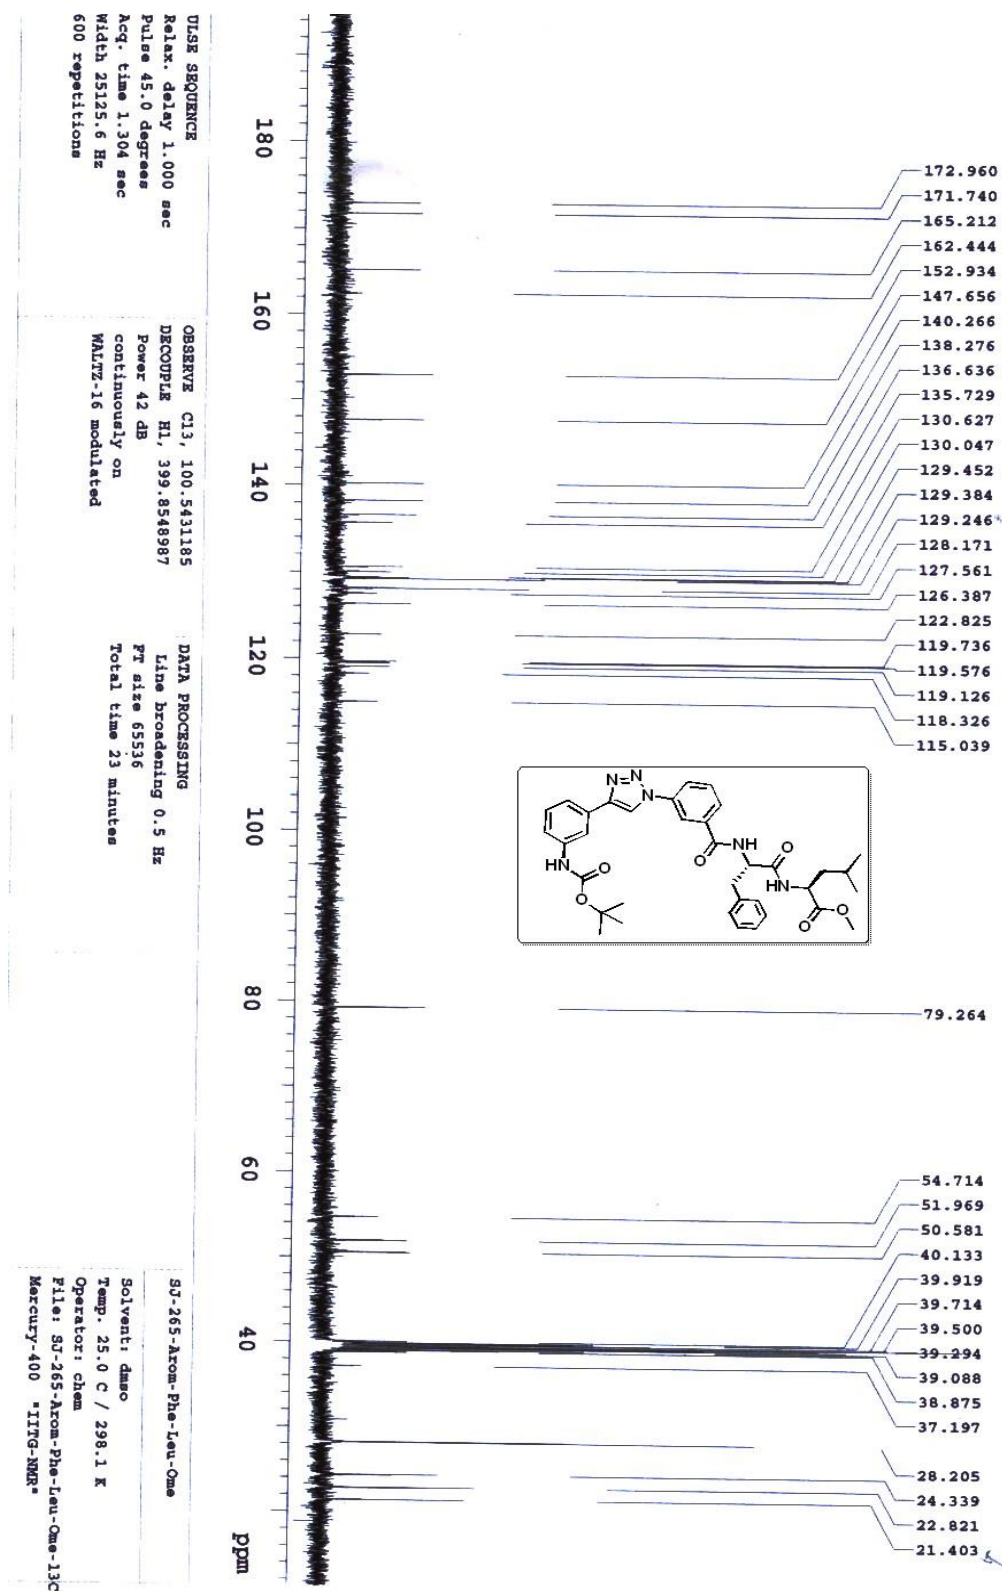

Figure S73. <sup>13</sup>C Spectra of synthesized compound 29.

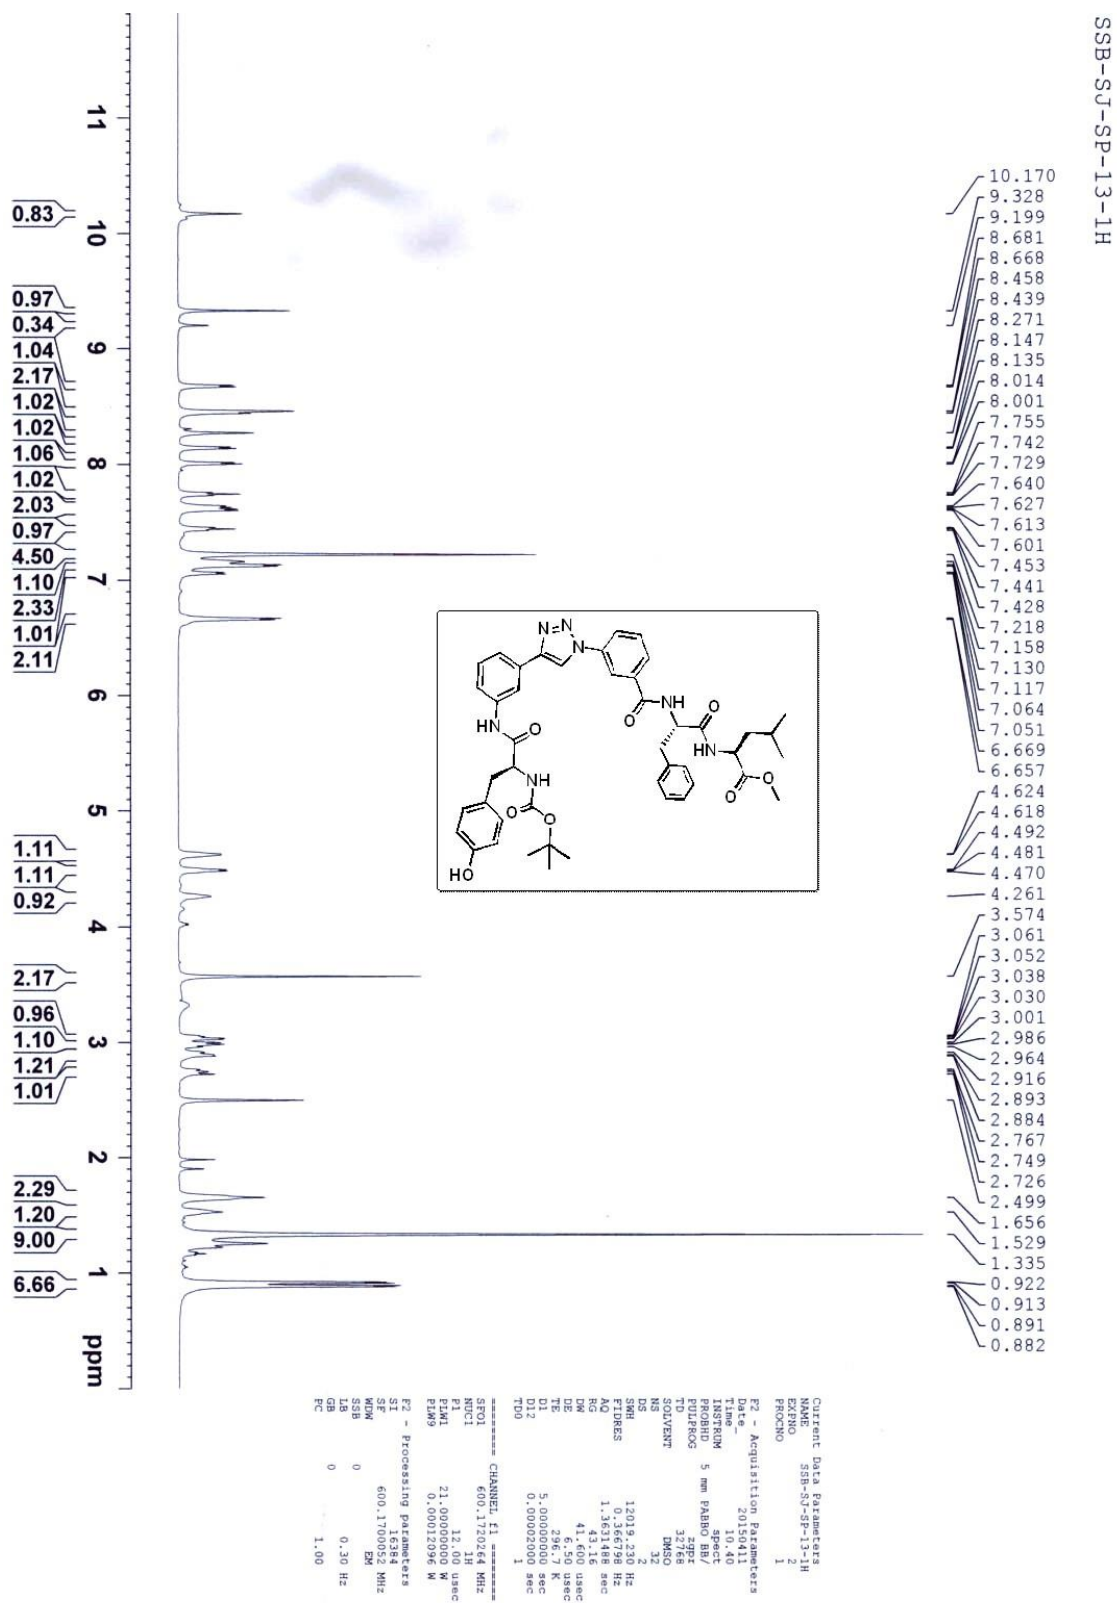

**Figure S74.**  $^1\text{H}$  Spectra of synthesized compound **3**.

SSB-SP-13-2-13C

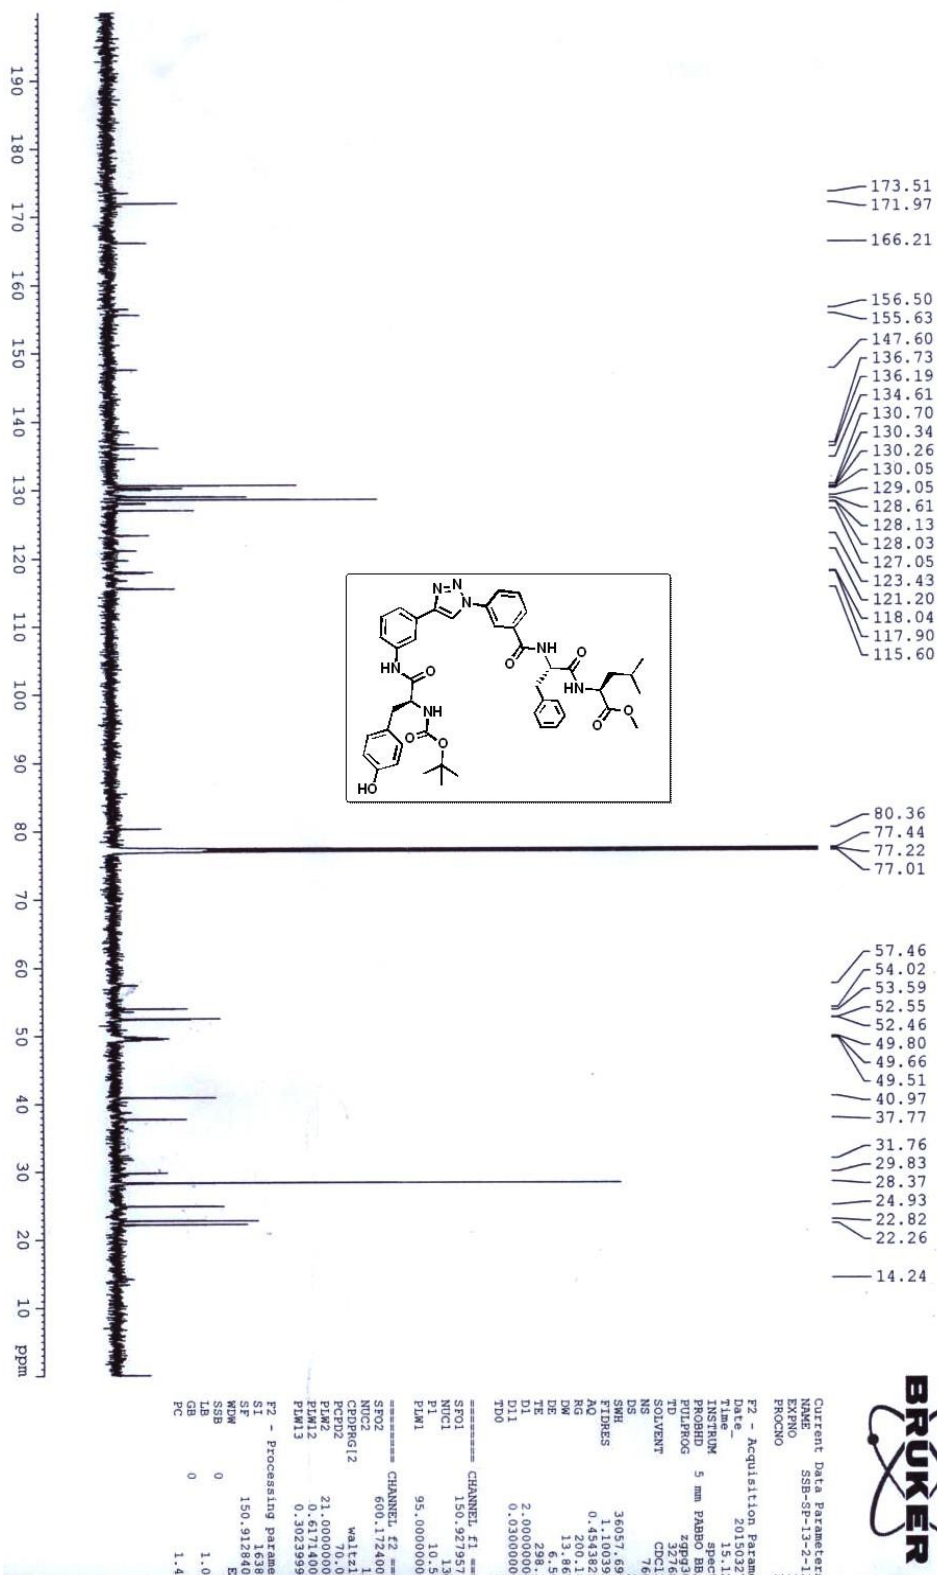

Figure S75.  $^{13}\text{C}$  Spectra of synthesized compound 3.
